# Supplementary material for: MDGAs are fast-diffusing molecules that delay excitatory synapse development by altering neuroligin behavior
Source: eLife journal article supplement (doi:10.7554/elife.75233), 2022-04-13

Figure 1A

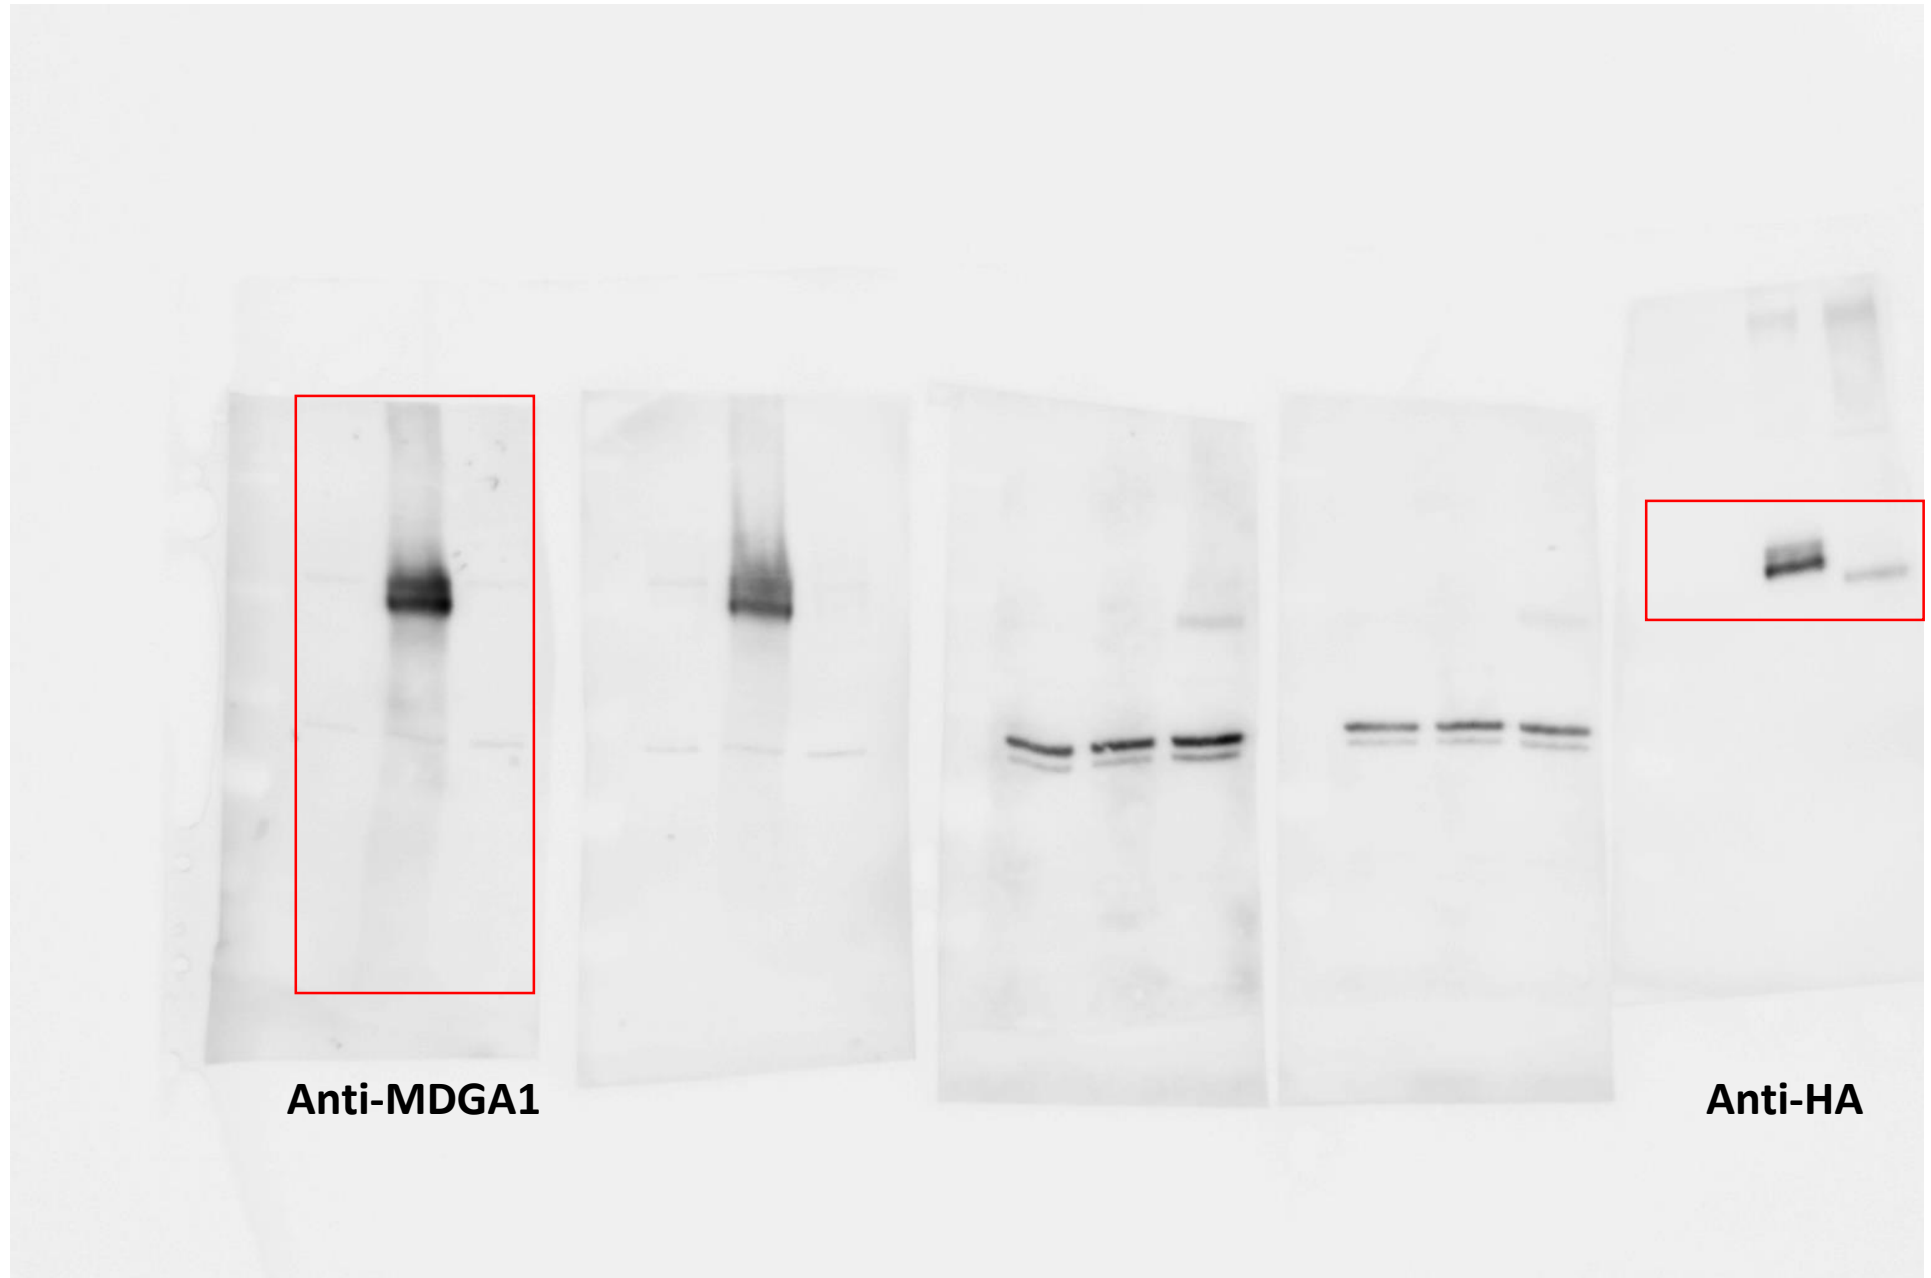

**Figure 1B**

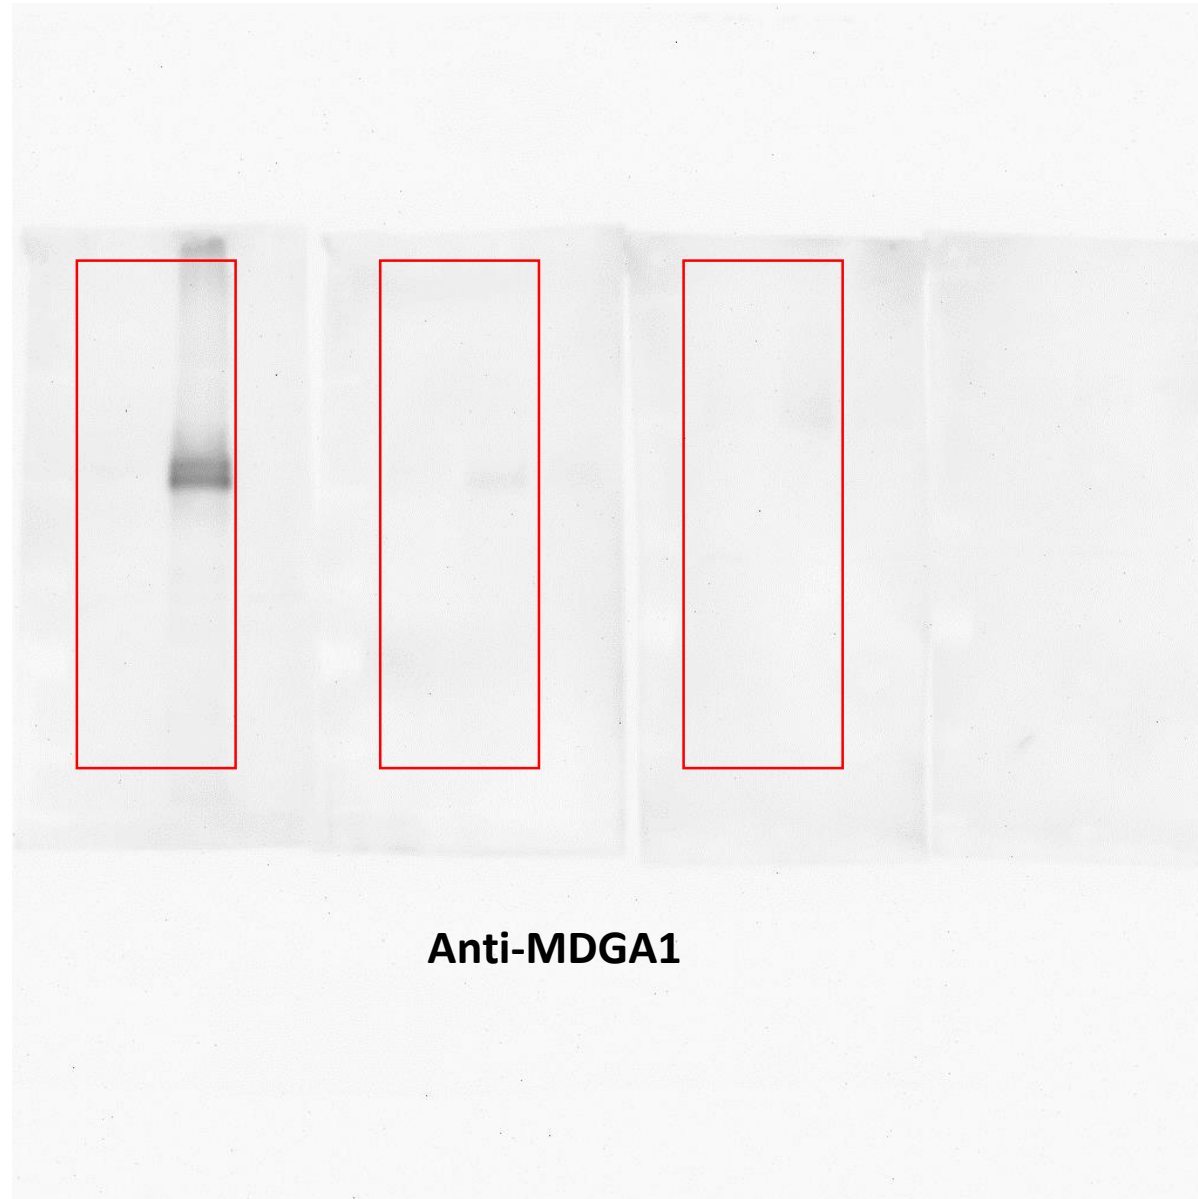

Figure 1C

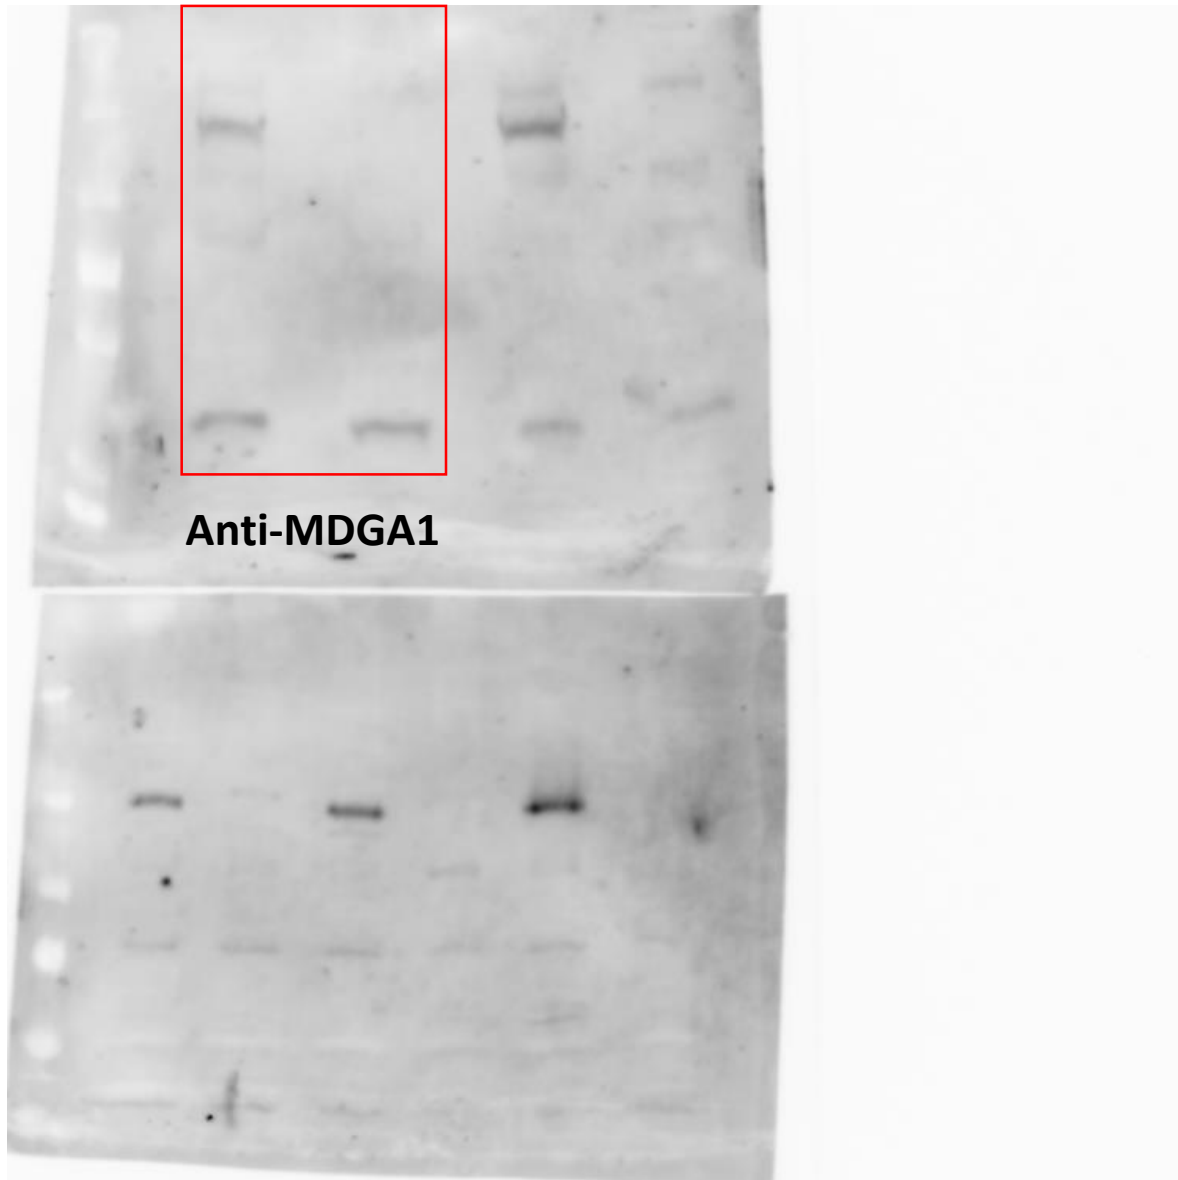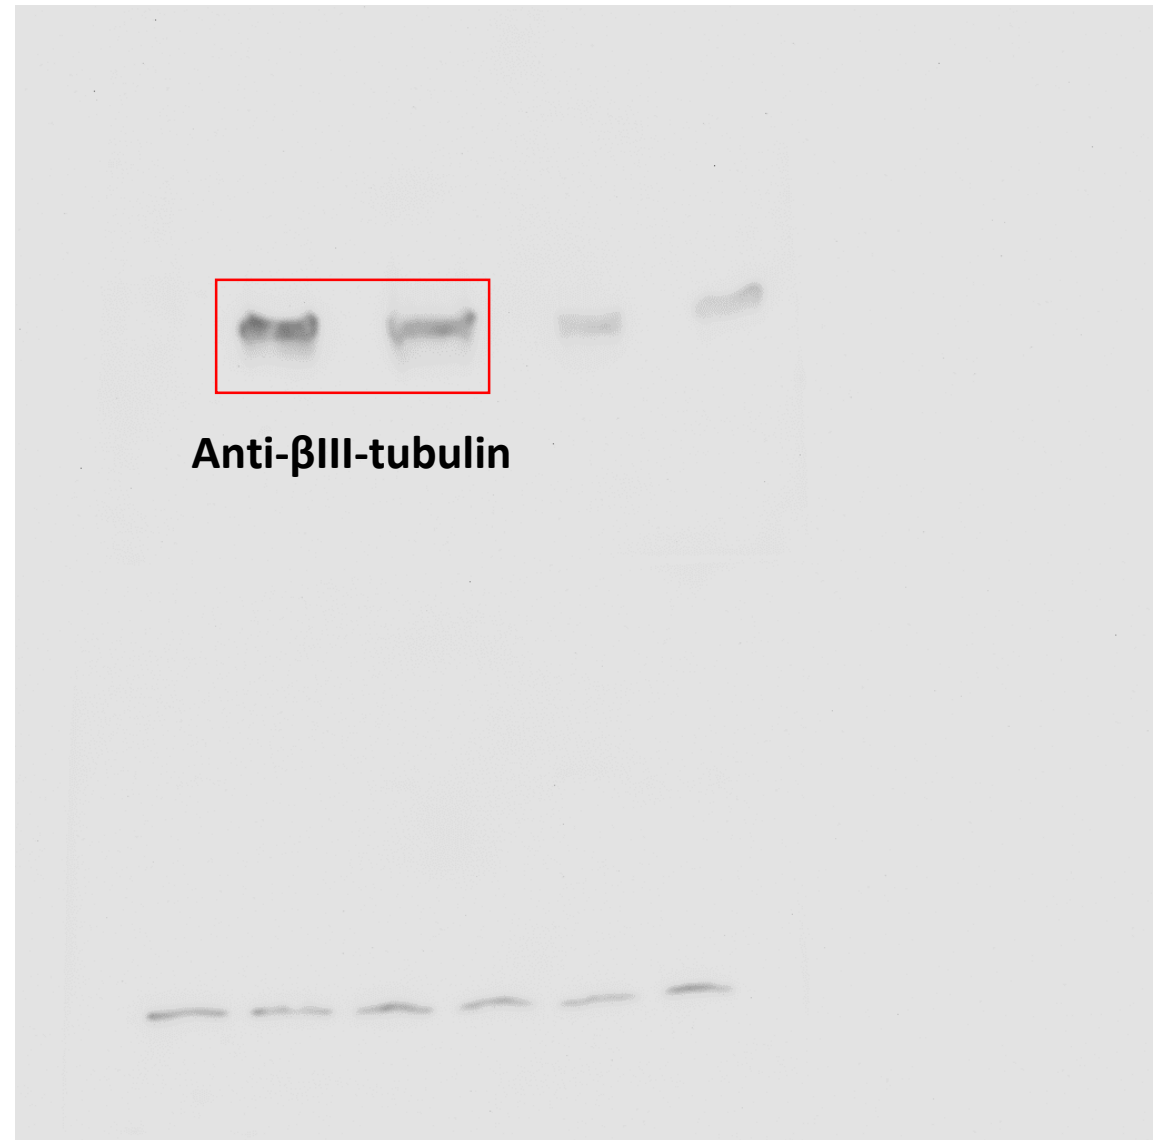

**Figure 1E**

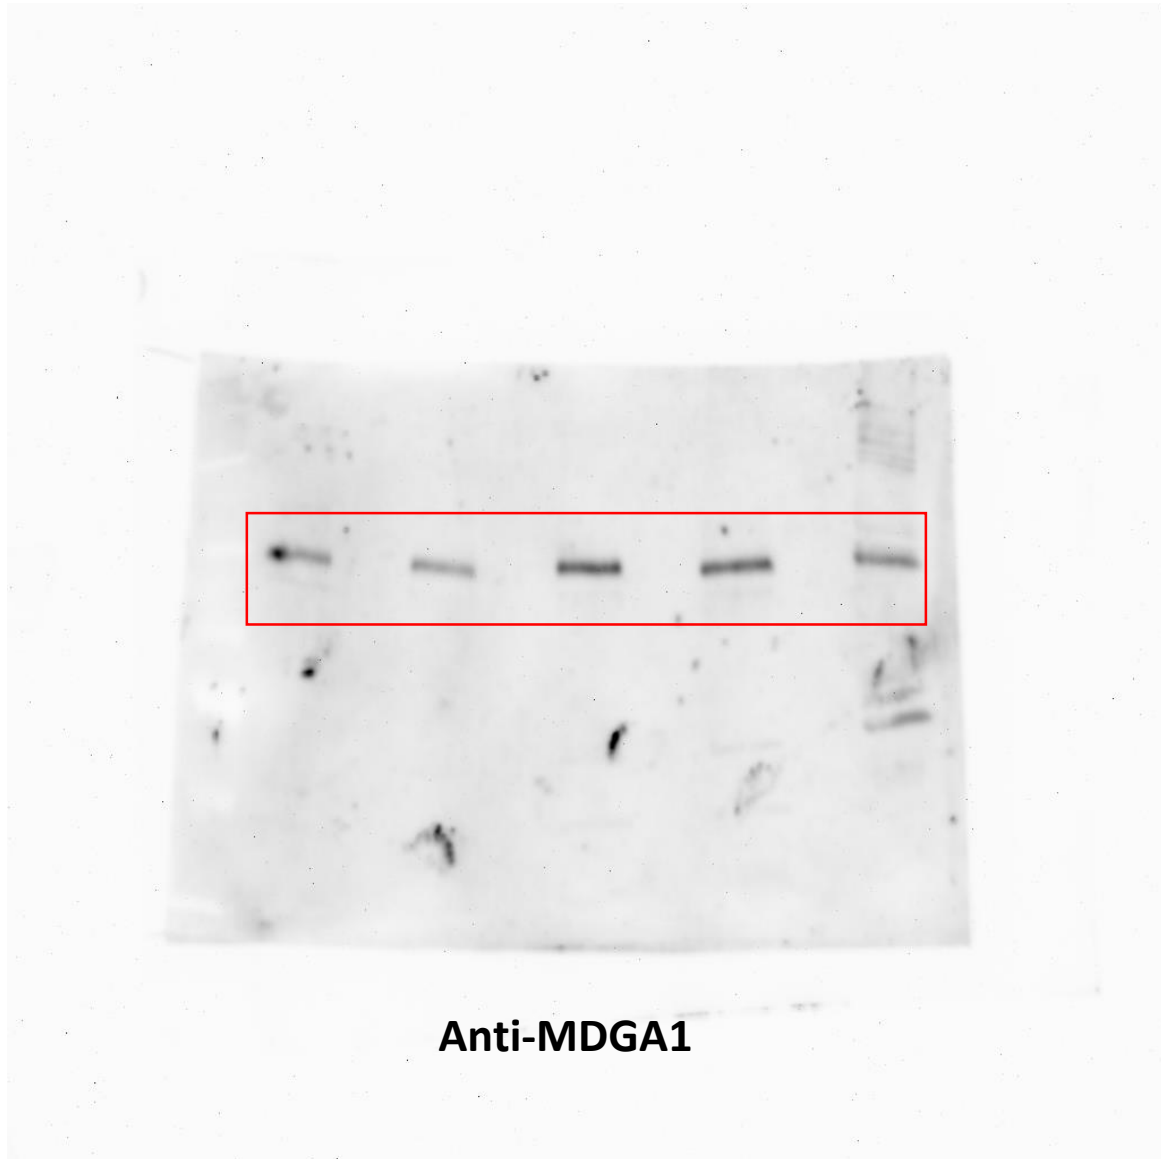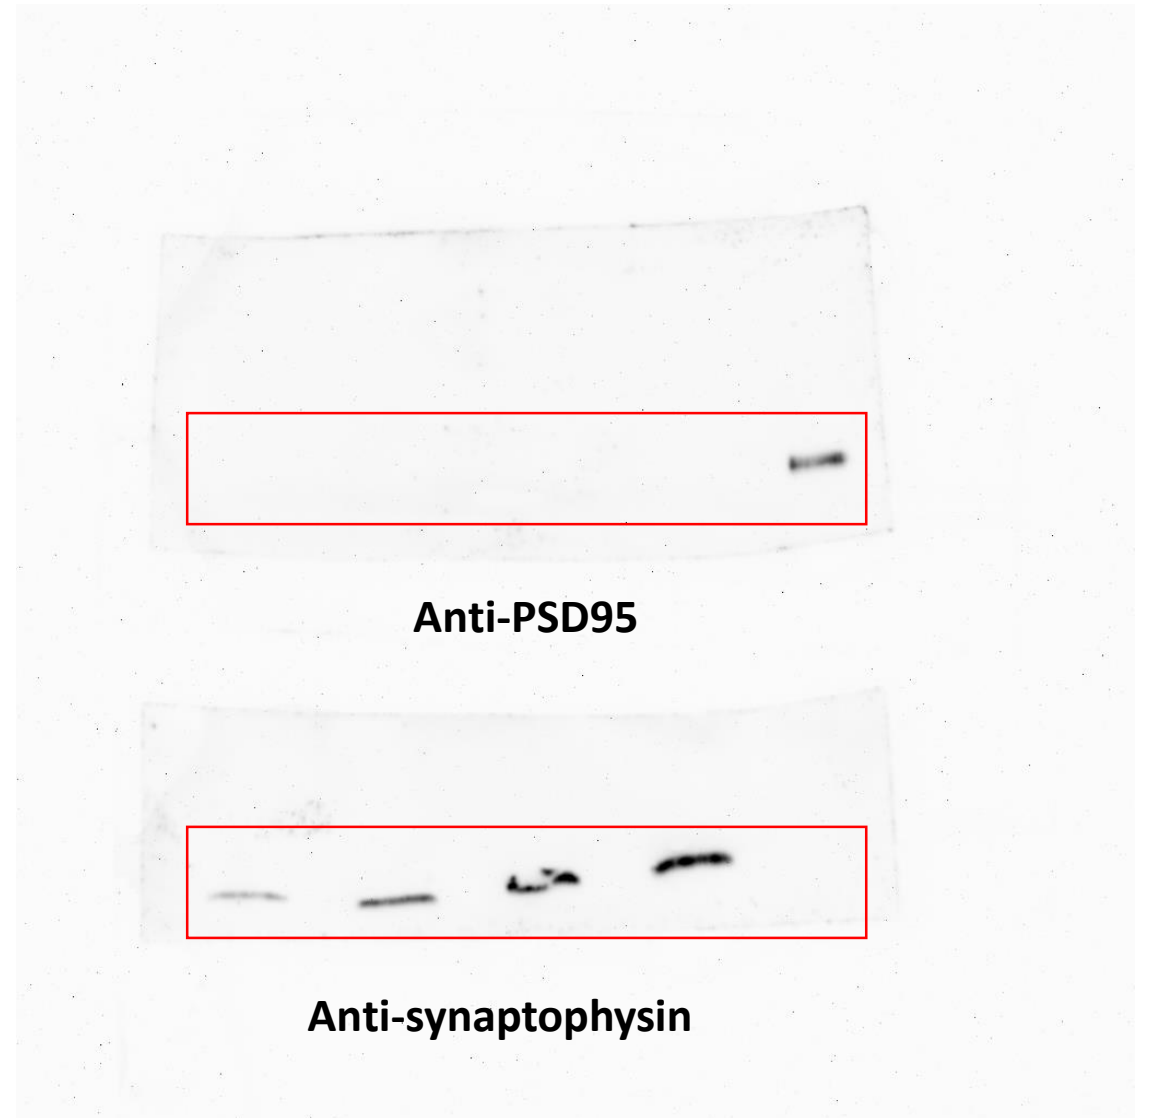

Supplement: fig1-data7 [file elife-75233-fig1-data7-v1.pdf]
