# Supplementary material for: MDGAs are fast-diffusing molecules that delay excitatory synapse development by altering neuroligin behavior
Source: eLife journal article supplement (doi:10.7554/elife.75233), 2022-04-13
Supplement: fig1-figsupp1-data10 [file elife-75233-fig1-figsupp1-data10-v1.pdf]

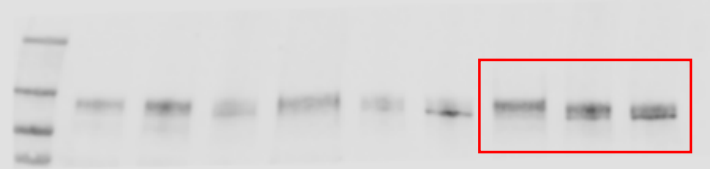

**Anti-NLGN1**

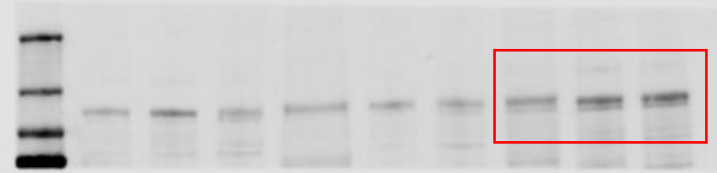

**Anti-NLGN2**

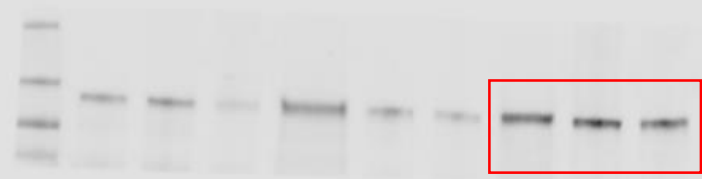

**Anti-NLGN3**

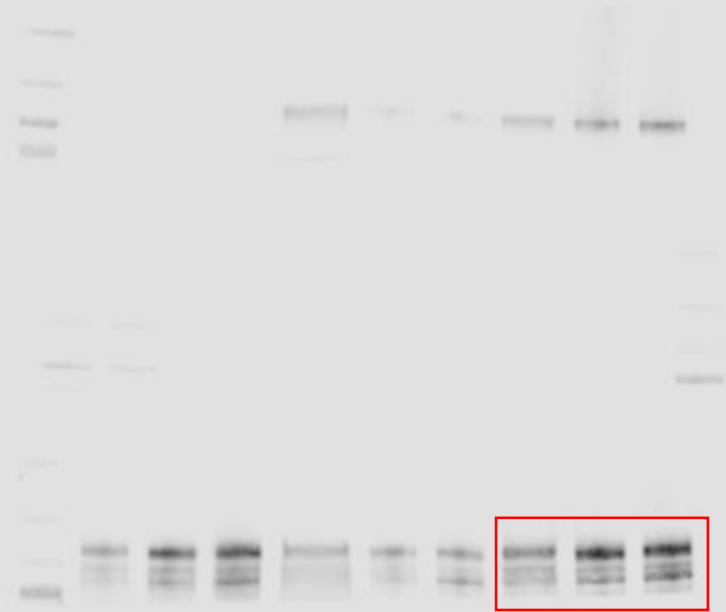

**Anti-PSD-95**

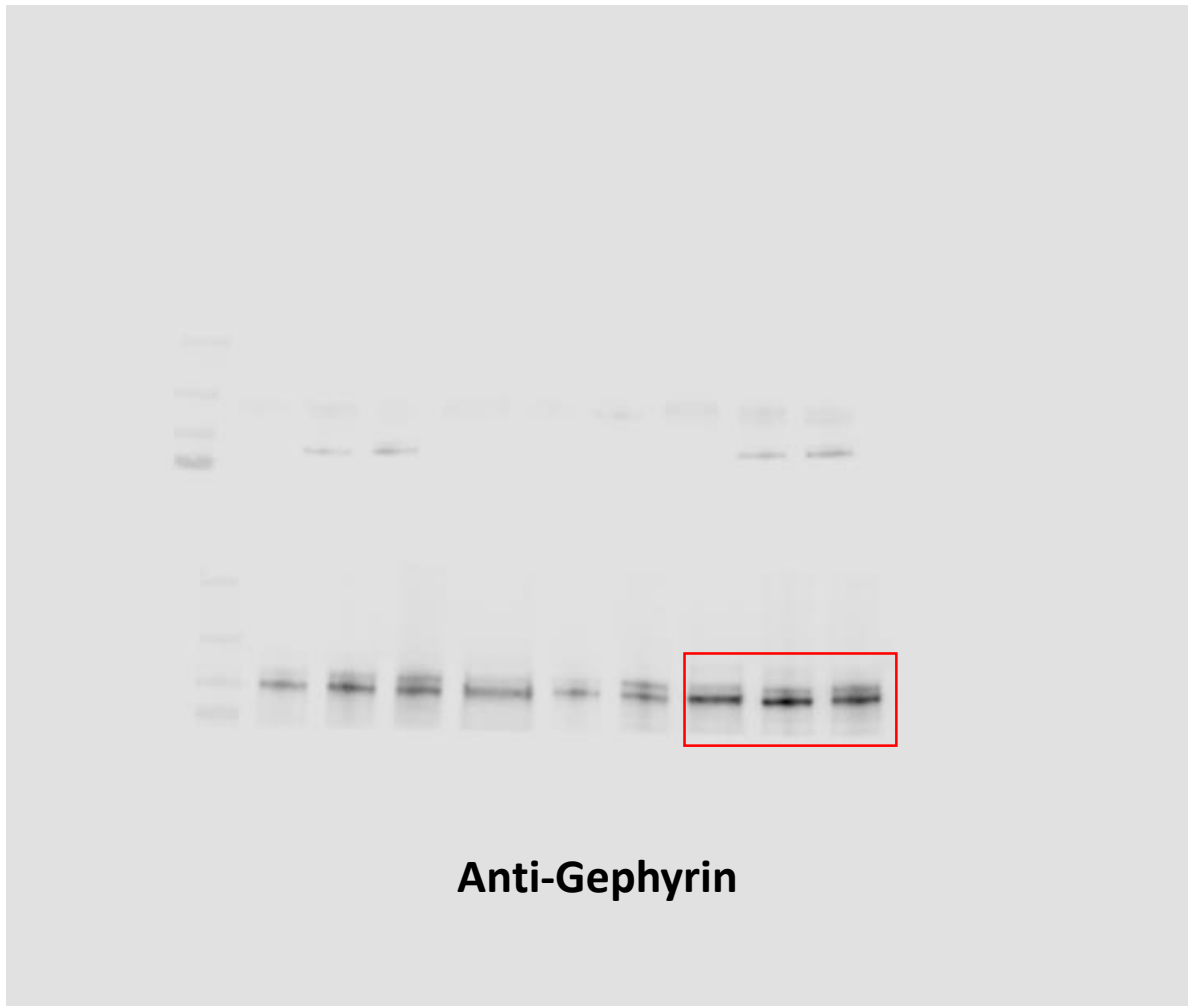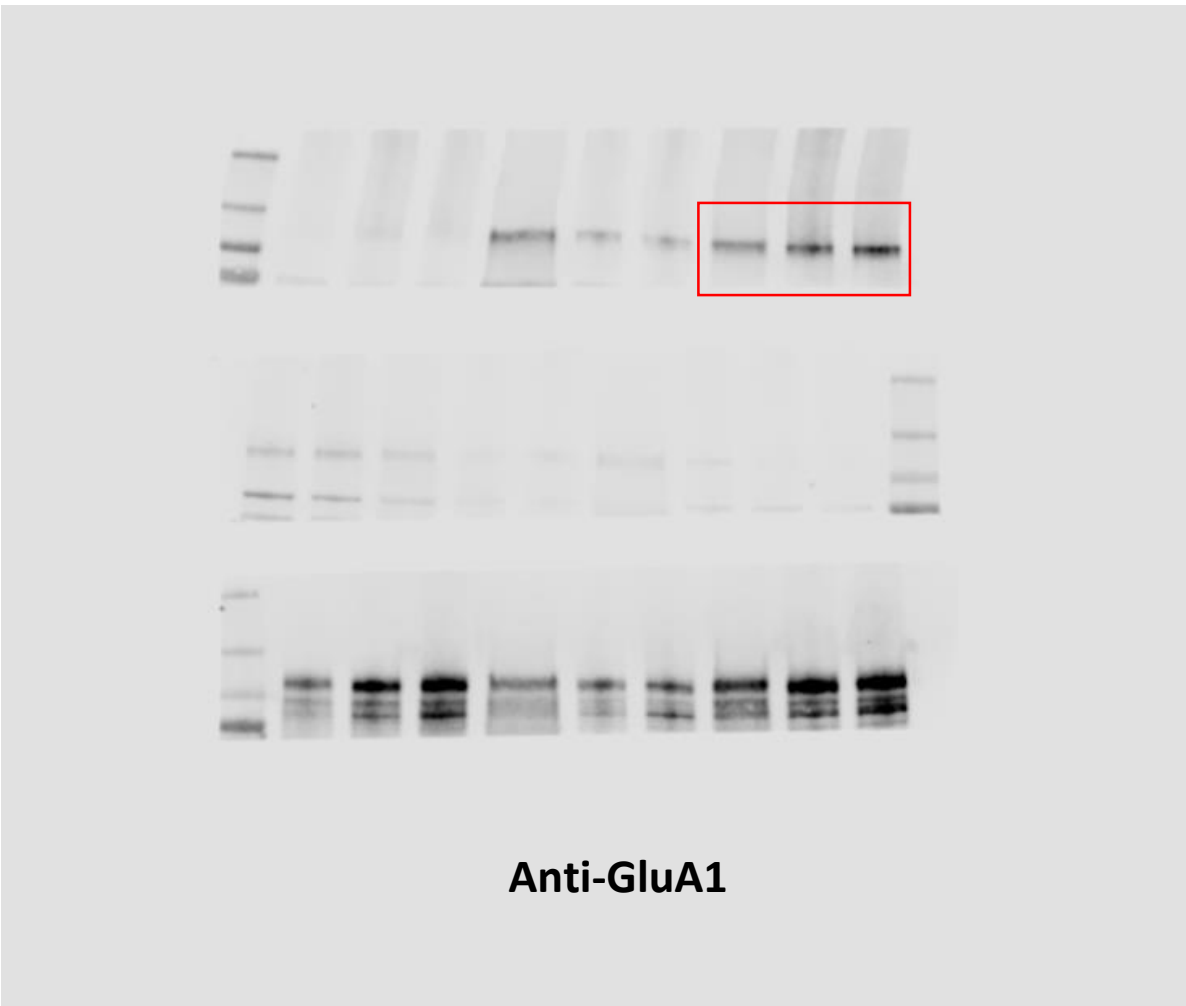

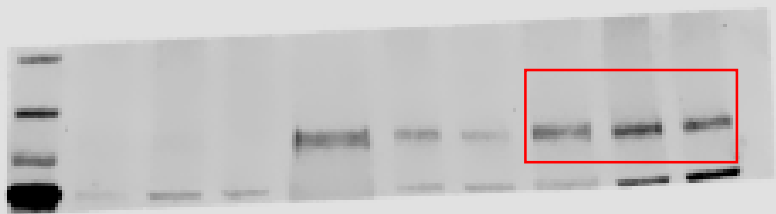

**Anti-GluA2**

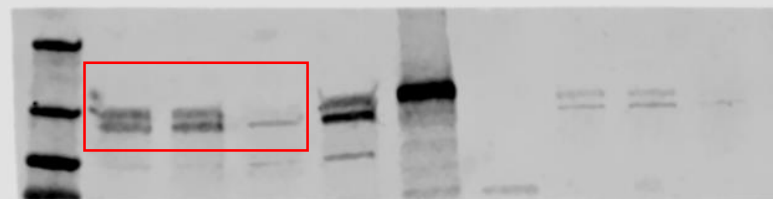

**Anti-MDGA1**

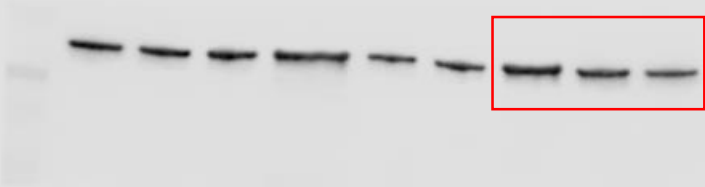

**Anti-Actin**
