# Supplementary material for: MDGAs are fast-diffusing molecules that delay excitatory synapse development by altering neuroligin behavior
Source: eLife journal article supplement (doi:10.7554/elife.75233), 2022-04-13
Supplement: fig2-figsupp1-data6 [file elife-75233-fig2-figsupp1-data6-v1.pdf]

**Figure 2 – figure supplement 1A**

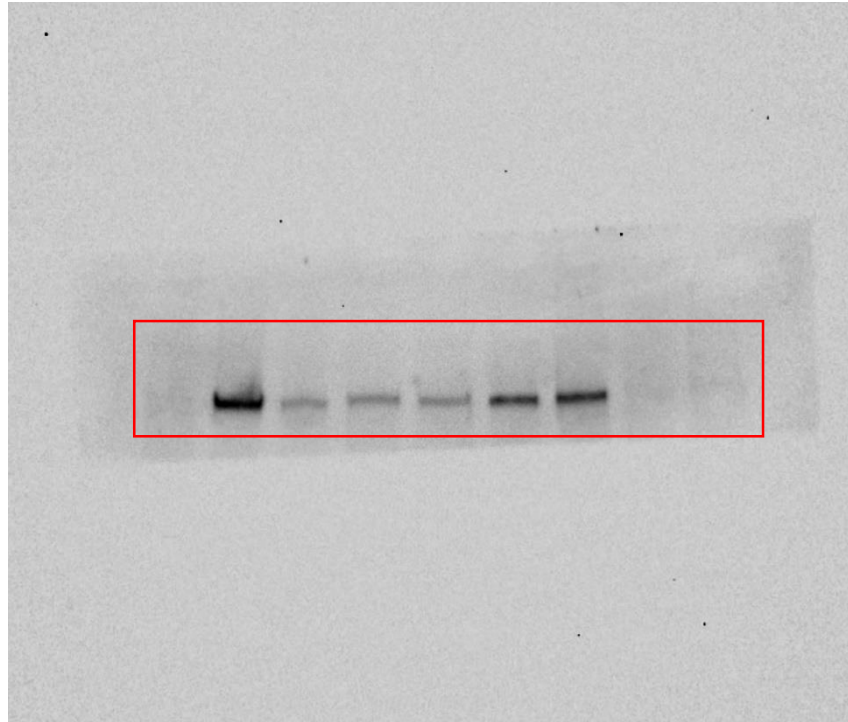

**Anti-MDGA1**

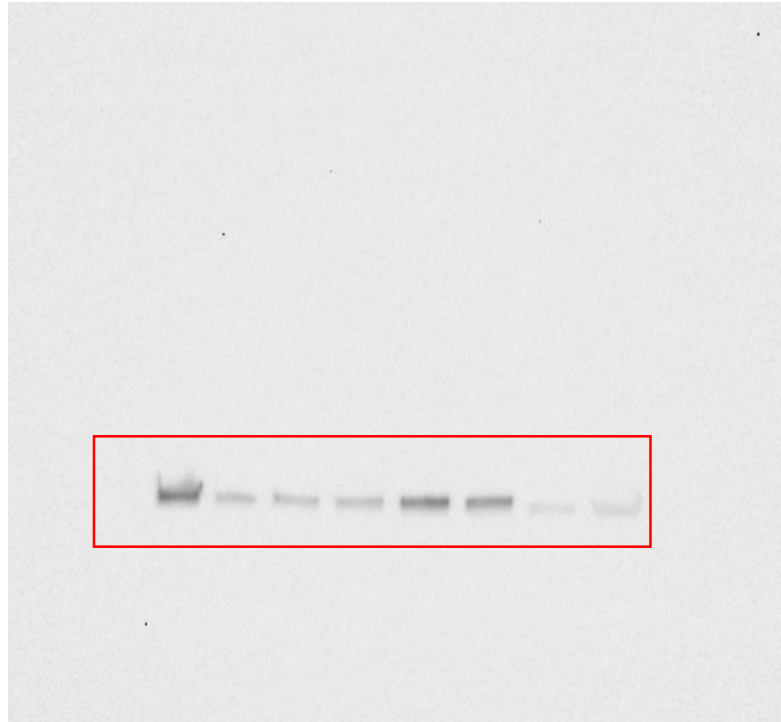

**Anti-HA**

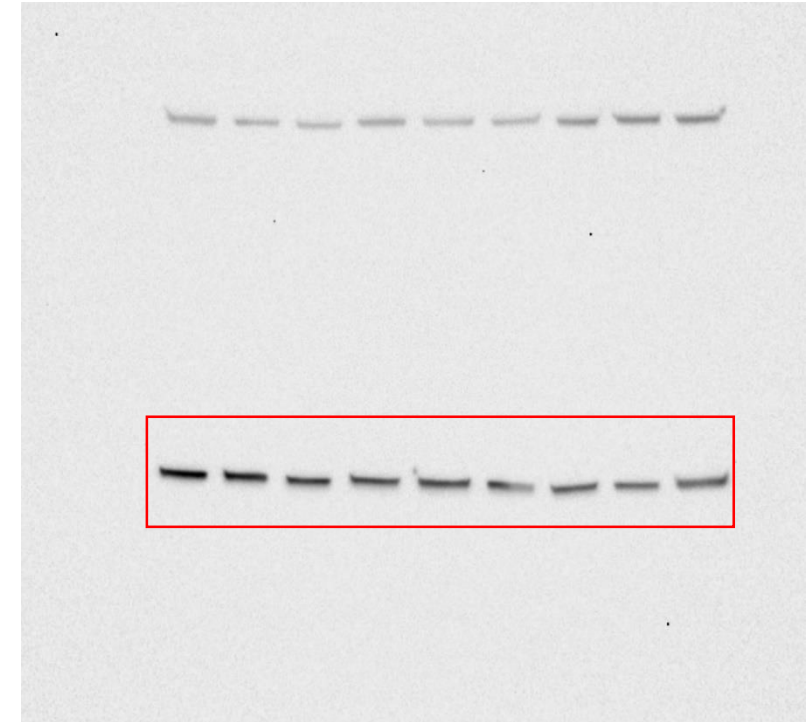

**Anti-Tubulin**

Figure 2 – figure supplement 1B

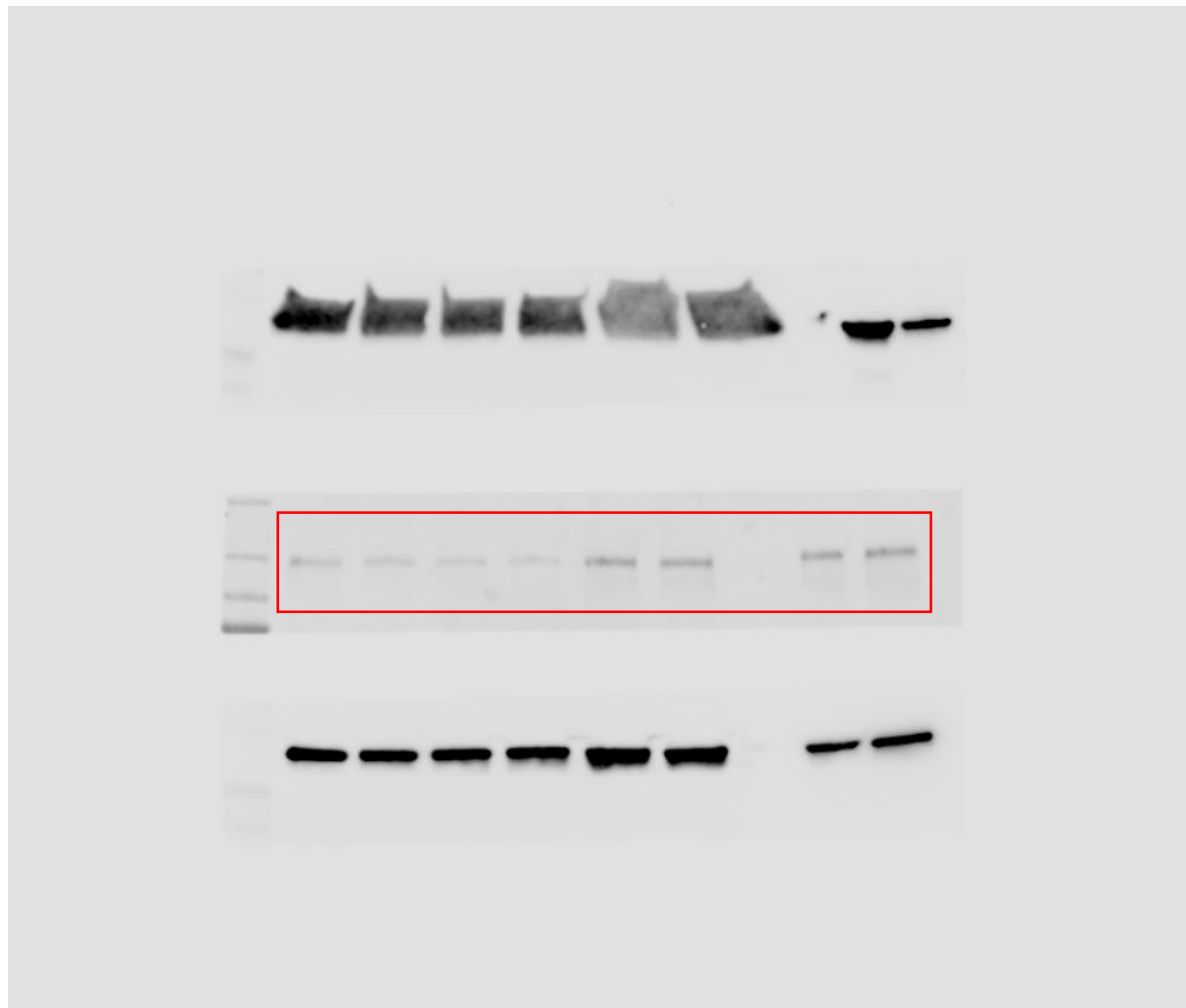

Anti-HA

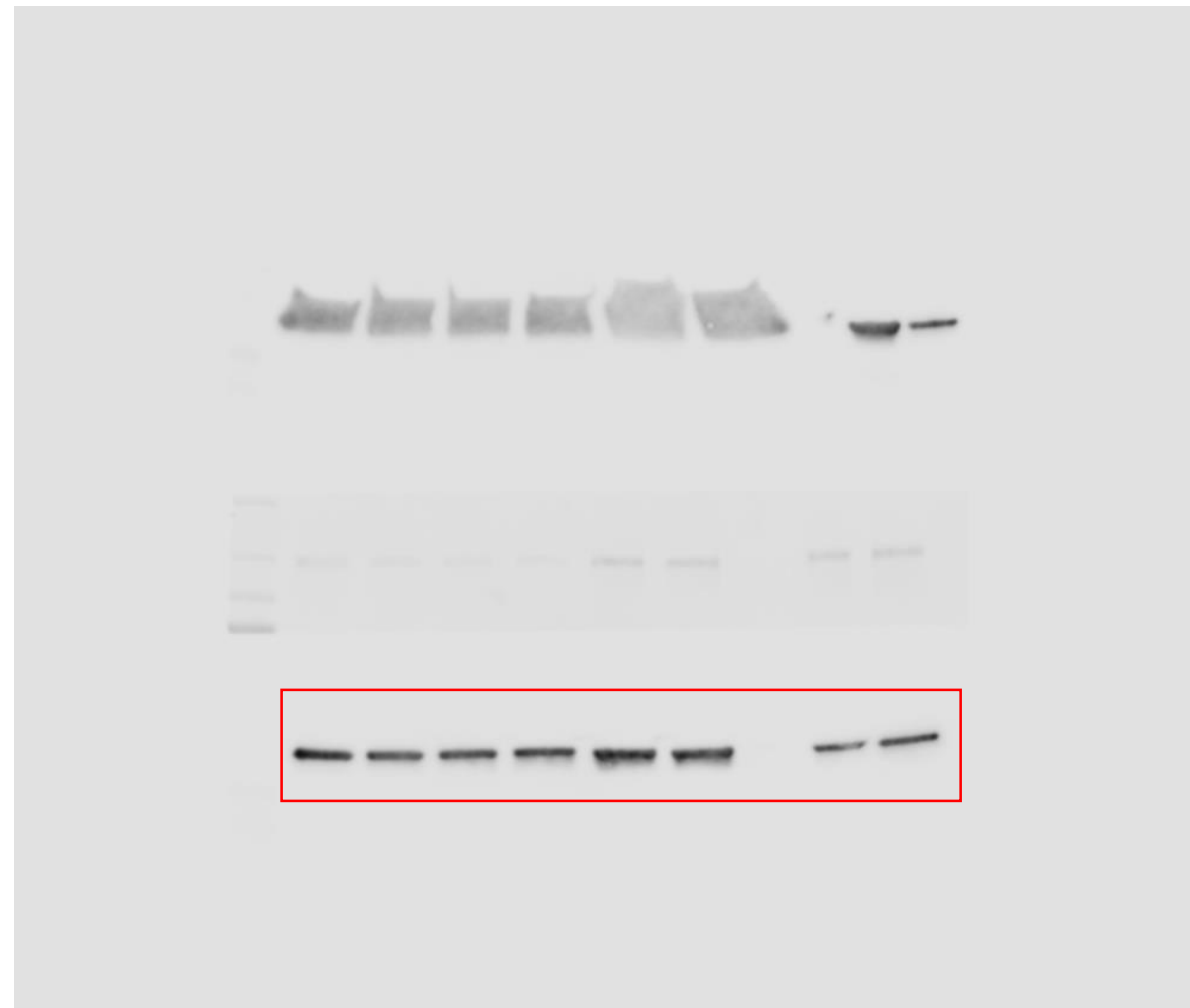

Anti-Actin
