# Supplementary material for: MDGAs are fast-diffusing molecules that delay excitatory synapse development by altering neuroligin behavior
Source: eLife. 2022 May 9;11:e75233. doi: 10.7554/eLife.75233 (PMC9084894; doi:10.7554/eLife.75233)
Supplement: Figure 1—figure supplement 1—source data 11. — Each graph (A,B,D) is shown in a separate sheet within the file. [file elife-75233-fig1-figsupp1-data11.xlsx]

## Sheet: Fig.1-S1A
7 DIV	14 DIV	21 DIV
55.0953	43.2269	40.3321
181.504	79.0041	64.6176
	185.318	62.4165
Descriptive Statistics
	7DIV	14DIV	21DIV	glia
Number of values	2	3	3	3
Minimum	55	43	40	78
Maximum	181	185	64	150
Range	126	142	24	72
Mean	118	102.3	55.33	111.7
Std. Deviation	89.1	73.82	13.32	36.23
Std. Error of Mean	63	42.62	7.688	20.92
ANOVA
Table Analyzed	MDGA1
Kruskal-Wallis test
P value	0.4718
Exact or approximate P value?	Exact
P value summary	ns
Do the medians vary signif. (P < 0.05)?	No
Number of groups	4
Kruskal-Wallis statistic	2.864
Data summary
Number of treatments (columns)	4
Number of values (total)	11
Kruskall Wallis
Number of families	1
Number of comparisons per family	6
Alpha	0.05
Dunn's multiple comparisons test	Mean rank diff,	Significant?	Summary	Adjusted P Value
7DIV vs. 14DIV	-0.1667	No	ns	>0,9999	A-B
7DIV vs. 21DIV	3.167	No	ns	>0,9999	A-C
7DIV vs. glia	-1.167	No	ns	>0,9999	A-D
14DIV vs. 21DIV	3.333	No	ns	>0,9999	B-C
14DIV vs. glia	-1	No	ns	>0,9999	B-D
21DIV vs. glia	-4.333	No	ns	0.6573	C-D
Test details	Mean rank 1	Mean rank 2	Mean rank diff,	n1	n2	Z
7DIV vs. 14DIV	6.5	6.667	-0.1667	2	3	0.05505
7DIV vs. 21DIV	6.5	3.333	3.167	2	3	1.046
7DIV vs. glia	6.5	7.667	-1.167	2	3	0.3853
14DIV vs. 21DIV	6.667	3.333	3.333	3	3	1.231
14DIV vs. glia	6.667	7.667	-1	3	3	0.3693
21DIV vs. glia	3.333	7.667	-4.333	3	3	1.6

## Sheet: Fig.1-S1B
7 DIV	14 DIV	21 DIV
84	119	117
120	115	80
	104
Descriptive Statistics
	7DIV	14DIV	21DIV	glia
Number of values	2	3	2	3
Minimum	84	104	80	141
Maximum	120	119	117	201
Range	36	15	37	60
Mean	102	112.7	98.5	161.3
Std. Deviation	25.46	7.767	26.16	34.36
Std. Error of Mean	18	4.485	18.5	19.84
Kruskall Wallis test
Table Analyzed	MDGA2
Kruskal-Wallis test
P value	0.0792
Exact or approximate P value?	Exact
P value summary	ns
Do the medians vary signif. (P < 0.05)?	No
Number of groups	4
Kruskal-Wallis statistic	6.036
Data summary
Number of treatments (columns)	4
Number of values (total)	10
Number of families	1
Number of comparisons per family	6
Alpha	0.05
Dunn's multiple comparisons test	Mean rank diff,	Significant?	Summary	Adjusted P Value
7DIV vs. 14DIV	0.1667	No	ns	>0,9999	A-B
7DIV vs. 21DIV	1.5	No	ns	>0,9999	A-C
7DIV vs. glia	-4.5	No	ns	0.6209	A-D
14DIV vs. 21DIV	1.333	No	ns	>0,9999	B-C
14DIV vs. glia	-4.667	No	ns	0.3543	B-D
21DIV vs. glia	-6	No	ns	0.1796	C-D
Test details	Mean rank 1	Mean rank 2	Mean rank diff,	n1	n2	Z
7DIV vs. 14DIV	4.5	4.333	0.1667	2	3	0.0603
7DIV vs. 21DIV	4.5	3	1.5	2	2	0.4954
7DIV vs. glia	4.5	9	-4.5	2	3	1.628
14DIV vs. 21DIV	4.333	3	1.333	3	2	0.4824
14DIV vs. glia	4.333	9	-4.667	3	3	1.888
21DIV vs. glia	3	9	-6	2	3	2.171

## Sheet: Fig.1-S1D
	NLGN1				NLGN2				NLGN3				Gephyrin				PSD-95					MDGA1				GluA1				GluA2
7IDV	14DIV	21DIV		7IDV	14DIV	21DIV		7IDV	14DIV	21DIV		7IDV	14DIV	21DIV		7IDV	14DIV	21DIV			7IDV	14DIV	21DIV		7IDV	14DIV	21DIV		7IDV	14DIV	21DIV
100	184.139	69.748		100	198.551	117.086		100	116.963	34.8131		100	236.117	258.988		100	239.052	259.216			100	56.4932	5.35675		100	200.071	118.734		100	196.84	200.665
100	84.7388	191.768		100	146.492	163.438		100	39.3015	70.3156		100	99.7084	173.557		100	176.363	207.324			100	92.5152	68.9714		100	98.4836	224.916
100	125.982	144.504		100	76.2193	256.131		100	82.3112	82.8814		100	141.198	172.885		100	239.231	281.798			100	102	68		100	141.437	142.817
																					100	117.669	20.3574
Kruskal Wallis test
Table Analyzed	NLGN1			Table Analyzed	NLGN2			Table Analyzed	NLGN3			Table Analyzed	Gephyrin		Table Analyzed	PSD-95						Table Analyzed	MDGA1			Table Analyzed	GluA1		Table analyzed		GluA2
Kruskal-Wallis test				Kruskal-Wallis test				Kruskal-Wallis test				Kruskal-Wallis test			Number of families	1						Kruskal-Wallis test				Kruskal-Wallis test			n = 1
P value	0.8179			P value	0.225			P value	0.225			P value	0.175		Number of comparisons per family	3						P value	0.0513			P value	0.225
Exact or approximate P value?	Exact			Exact or approximate P value?	Exact			Exact or approximate P value?	Exact			Exact or approximate P value?	Exact		Alpha	0.05						Exact or approximate P value?	Exact			Exact or approximate P value?	Exact
P value summary	ns			P value summary	ns			P value summary	ns			P value summary	ns									P value summary	ns			P value summary	ns
Do the medians vary signif. (P < 0.05)?	No			Do the medians vary signif. (P < 0.05)?	No			Do the medians vary signif. (P < 0.05)?	No			Do the medians vary signif. (P < 0.05)?	No		Dunn's multiple comparisons test	Mean rank diff,	Significant?	Summary	Adjusted P Value			Do the medians vary signif. (P < 0.05)?	No			Do the medians vary signif. (P < 0.05)?	No
Number of groups	3			Number of groups	3			Number of groups	3			Number of groups	3		7 DIV vs. 14 DIV	-3.667	No	ns	0.2861	A-B		Number of groups	3			Number of groups	3
Kruskal-Wallis statistic	0.6437			Kruskal-Wallis statistic	3.31			Kruskal-Wallis statistic	3.31			Kruskal-Wallis statistic	3.954		7 DIV vs. 14 DIV	-5.333	Yes	*	0.0458	A-C		Kruskal-Wallis statistic	5.899			Kruskal-Wallis statistic	3.31
															14 DIV vs. 21 DIV	-1.667	No	ns	>0,9999	B-C
Data summary				Data summary				Data summary				Data summary										Data summary				Data summary
Number of treatments (columns)	3			Number of treatments (columns)	3			Number of treatments (columns)	3			Number of treatments (columns)	3		Test details	Mean rank 1	Mean rank 2	Mean rank diff	n1	n2		Number of treatments (columns)	3			Number of treatments (columns)	3
Number of values (total)	9			Number of values (total)	9			Number of values (total)	9			Number of values (total)	9		7 DIV vs. 14 DIV	2	5.667	-3.667	3	3		Number of values (total)	12			Number of values (total)	9
															7 DIV vs. 14 DIV	2	7.333	-5.333	3	3
															14 DIV vs. 21 DIV	5.667	7.333	-1.667	3	3
