# Supplementary material for: MDGAs are fast-diffusing molecules that delay excitatory synapse development by altering neuroligin behavior
Source: eLife. 2022 May 9;11:e75233. doi: 10.7554/eLife.75233 (PMC9084894; doi:10.7554/eLife.75233)
Supplement: Figure 1—figure supplement 3—source data 1. — Each graph (B,C,D,E) is shown in a separate sheet within the file. [file elife-75233-fig1-figsupp3-data1.xlsx]

## Sheet: Fig.1-S3B
10 DIV	14 DIV	21 DIV
0.658269	0.571023	1.36813
0.629881	0.535753	0.901039
0.310202	0.802772	0.731432
0.386842	0.131499	1.32744
1.7751	1.33658	0.407877
1.61939	0.370018	0.460584
1.89475	0.644081	0.459231
1.52579	0.767708	0.900838
1.55335	0.430969	1.43774
1.04336	0.338735	0.602038
0.894871	0.253447	0.615854
0.71575	0.58414	0.897059
0.695182	0.582833	0.0450649
0.705686	0.549044	0.63514
1.1277	0.335721	0.90198
0.559068	0.475853	0.468934
0.517124	0.418787	0.785749
0.658708		1.11096
1.20878		0.552221
0.655759		0.957881
0.506167
0.621165
1.05072
1.39132
0.964145
1.19773
0.78334
2.34985
1.03242	1.5257	0.268993
0.205691	0.336345	0.397315
1.27083	1.9772	0.634956
0.599544	0.913051	0.513304
0.807819	1.34329	0.509126
0.874964	1.41727	0.915261
0.956989	1.64578	0.173491
0.883782	0.93312	0.192837
1.14568	0.773844	0.233558
1.09845	0.841781	1.26647
1.19763	0.37927	0.834868
1.29121	1.70967	1.71506
1.42911	1.29298	1.01262
1.11263	2.74672	1.28863
1.41632	1.05321	1.27686
0.81016	1.30581	0.538237
1.13179	1.6026	1.0166
0.951101	2.71112	0.808645
0.258635	2.47037	1.73913
0.87728	2.96767	0.815364
1.94985	2.2779	0.450806
0.72357	1.82403	1.446
1.0725	2.53946	1.16912
0.778371	2.27229	1.04238
0.794841	1.24678	1.32475
0.95513	1.53434	0.899465
1.07382	0.846347	0.355523
1.18617	0.501814	0.510264
0.515615	0.651637	0.397422
0.82971	0.392197	0.385967
1.14974	0.972387	1.06547
2.01883	1.2633	0.640936
0.599805	1.75837	0.995855
	1.21151	0.369807
	0.816558	0.333077
	0.983773	0.887895
	1.02755	1.12473
	1.21549	0.91832
	1.10256	0.826576
	1.10886	0.693006
	0.450889	1.228
		0.710457
Descriptive Statistics
	10 DIV	14 DIV	21 DIV
Number of values	61	58	62
Minimum	0.2057	0.1315	0.04506
Maximum	2.35	2.968	1.739
Range	2.144	2.836	1.694
Mean	1	1.122	0.7983
Std. Deviation	0.4397	0.7054	0.3884
Std. Error of Mean	0.0563	0.09263	0.04933
Normality Test
	10 DIV	14 DIV	21 DIV
Test for normal distribution
Anderson-Darling test
A2*	0.7361	1.414	0.3857
P value	0.0522	0.0011	0.3814
Passed normality test (alpha=0.05)?	Yes	No	Yes
P value summary	ns	**	ns
D'Agostino & Pearson test
K2	8.194	7.773	1.794
P value	0.0166	0.0205	0.4079
Passed normality test (alpha=0.05)?	No	No	Yes
P value summary	*	*	ns
Shapiro-Wilk test
W	0.9575	0.917	0.9789
P value	0.0333	0.0007	0.363
Passed normality test (alpha=0.05)?	No	No	Yes
P value summary	*	***	ns
Kolmogorov-Smirnov test
KS distance	0.1044	0.101	0.07668
P value	0.096	>0,1000	>0,1000
Passed normality test (alpha=0.05)?	Yes	Yes	Yes
P value summary	ns	ns	ns
Number of values	61	58	62
Statistical Analysis
Table Analyzed	338 339
Kruskal-Wallis test
P value	0.0257
Exact or approximate P value?	Approximate
P value summary	*
Do the medians vary signif. (P < 0.05)?	Yes
Number of groups	3
Kruskal-Wallis statistic	7.321
Data summary
Number of treatments (columns)	3
Number of values (total)	181
Number of families	1
Number of comparisons per family	3
Alpha	0.05
Dunn's multiple comparisons test	Mean rank diff,	Significant?	Summary	Adjusted P Value
10 DIV vs. 14 DIV	-1.291	No	ns	>0,9999	A-B
10 DIV vs. 21 DIV	21.55	No	ns	0.0677	A-C
14 DIV vs. 21 DIV	22.84	No	ns	0.0511	B-C
Test details	Mean rank 1	Mean rank 2	Mean rank diff,	n1	n2	Z
10 DIV vs. 14 DIV	97.97	99.26	-1.291	61	58	0.1344
10 DIV vs. 21 DIV	97.97	76.42	21.55	61	62	2.28
14 DIV vs. 21 DIV	99.26	76.42	22.84	58	62	2.386

## Sheet: Fig.1-S3C
cluster intensity
10 DIV	14 DIV	21 DIV
1.01305	1.09325	0.633392
0.621546	1.87843	0.961426
0.964887	0.955375	0.581011
0.541744	1.36692	0.760885
0.862015	1.68493	1.06223
0.814745	1.02901	1.20545
1.23858	1.56375	1.22482
1.24041	1.18176	0.934208
1.20895	0.600841	0.478801
0.928055	1.67184	0.834929
1.15848	1.87084	0.641379
0.85943	1.35793	1.59396
1.13789	1.95519	0.980344
0.783083	2.63733	1.06854
0.671926	2.37404	1.24986
1.70293	2.48339	1.25617
1.37643	2.1806	0.938128
0.96511	2.19924	0.59345
1.26304	2.14746	0.946152
0.878604	1.75515	0.805391
1.20517	0.993577	0.806233
0.563923	0.640293	0.581927
	0.998119	0.804226
	1.26378	0.614534
	1.51692	0.73336
	1.45463	0.877074
	1.37627	0.818552
	1.24906	0.855952
	1.34364	0.646074
	1.25243
	0.290059
0.447934	0.402354	0.868763
0.798321	0.484077	0.633424
1.39019	0.196493	0.966218
1.51799	0.56731	0.734129
1.94736	0.527604	0.599413
1.39192	0.546951	0.64008
0.797433	0.241199	0.793011
0.608142	0.496917	1.05451
0.580124	0.266481	1.19934
0.693638	0.233794	0.661885
1.13932		0.770614
0.622568		0.417307
0.705599		0.642092
1.15931		0.41454
0.623256		0.674805
0.774284		0.936327
1.28687		1.00256
0.98503		0.606372
1.05114		0.401844
0.658365
1.82119
Descriptive Statistics
	10 DIV	14 DIV	21 DIV
Number of values	43	41	48
Minimum	0.4479	0.1965	0.4018
Maximum	1.947	2.637	1.594
Range	1.499	2.441	1.192
Mean	1	1.228	0.823
Std. Deviation	0.3575	0.6876	0.2507
Std. Error of Mean	0.05452	0.1074	0.03618
Normality Test
	10 DIV	14 DIV	21 DIV
Test for normal distribution
Anderson-Darling test
A2*	0.6086	0.4468	0.5354
P value	0.1066	0.2676	0.162
Passed normality test (alpha=0.05)?	Yes	Yes	Yes
P value summary	ns	ns	ns
D'Agostino & Pearson test
K2	4.172	3.296	5.011
P value	0.1242	0.1925	0.0816
Passed normality test (alpha=0.05)?	Yes	Yes	Yes
P value summary	ns	ns	ns
Shapiro-Wilk test
W	0.9477	0.9579	0.9594
P value	0.0493	0.1329	0.0951
Passed normality test (alpha=0.05)?	No	Yes	Yes
P value summary	*	ns	ns
Kolmogorov-Smirnov test
KS distance	0.09802	0.1205	0.09786
P value	>0,1000	>0,1000	>0,1000
Passed normality test (alpha=0.05)?	Yes	Yes	Yes
P value summary	ns	ns	ns
Number of values	43	41	48
One way ANOVA
Table Analyzed	cluster intensity
Data sets analyzed	A-C
ANOVA summary
F	8.575
P value	0.0003
P value summary	***
Significant diff. among means (P < 0.05)?	Yes
R square	0.1173
Brown-Forsythe test
F (DFn, DFd)	22,81 (2, 129)
P value	<0,0001
P value summary	****
Are SDs significantly different (P < 0.05)?	Yes
Bartlett's test
Bartlett's statistic (corrected)	45.32
P value	<0,0001
P value summary	****
Are SDs significantly different (P < 0.05)?	Yes
ANOVA table	SS	DF	MS	F (DFn, DFd)	P value
Treatment (between columns)	3.621	2	1.81	F (2, 129) = 8,575	P=0,0003
Residual (within columns)	27.23	129	0.2111
Total	30.86	131
Data summary
Number of treatments (columns)	3
Number of values (total)	132
Number of families	1
Number of comparisons per family	3
Alpha	0.05
Tukey's multiple comparisons test	Mean Diff,	95,00% CI of diff,	Significant?	Summary	Adjusted P Value
10 DIV vs. 14 DIV	-0.2275	-0,4653 to 0,01027	No	ns	0.0639	A-B
10 DIV vs. 21 DIV	0.177	-0,05179 to 0,4057	No	ns	0.1626	A-C
14 DIV vs. 21 DIV	0.4045	0,1728 to 0,6362	Yes	***	0.0002	B-C
Test details	Mean 1	Mean 2	Mean Diff,	SE of diff,	n1	n2	q	DF
10 DIV vs. 14 DIV	1	1.228	-0.2275	0.1003	43	41	3.208	129
10 DIV vs. 21 DIV	1	0.823	0.177	0.09648	43	48	2.594	129
14 DIV vs. 21 DIV	1.228	0.823	0.4045	0.09771	41	48	5.855	129

## Sheet: Fig.1-S3D
clsuter area
10 DIV	14 DIV	21 DIV
0.334644	0.320859	0.310164
0.259675	0.299972	0.290913
0.496518	0.330516	0.298246
0.441883	0.459593	0.375353
0.337942	0.29512	0.285069
0.351796	0.292093	0.303788
0.261169	0.308025	0.331923
0.324464	0.348631	0.334101
0.447392	0.293505	0.400088
0.411816	0.350695	0.309765
0.361623	0.573927	0.345853
0.33743	0.299018	0.326803
0.358095	0.360086	0.376214
0.379145	0.344051	0.305496
0.299993	0.547	0.355135
0.317993	0.306421	0.296539
0.356918	0.390651	0.350974
0.334314	0.352186	0.264021
0.342662	0.340863	0.26982
0.324634	0.373709	0.26159
0.317921	0.388698	0.331867
0.2553	0.303938	0.284331
	0.4107	0.346829
	0.331061	0.349999
	0.327346	0.513714
	0.376475	0.270582
	0.300625	0.31056
	0.343696	0.358394
	0.298414	0.359519
	0.308025
	0.297711
0.323821	0.334314	0.388728
0.386742	0.343372	0.296543
0.431323	0.25984	0.32799
0.302431	0.30593	0.448084
0.313651	0.277826	0.387484
0.307632	0.283756	0.37555
0.463044	0.266506	0.394158
0.352872	0.386026	0.402352
0.338647	0.302393	0.330485
0.400107	0.38898	0.277991
0.313182		0.29256
0.348473		0.394904
0.26059		0.306451
0.2799		0.263752
0.310406		0.265834
0.346349		0.28104
0.338253		0.370608
0.38622		0.305709
0.380964		0.276758
0.306247
0.371683
Descriptive Statistics area
	10 DIV	14 DIV	21 DIV
Number of values	43	41	48
Minimum	0.2553	0.2598	0.2616
Maximum	0.4965	0.5739	0.5137
Range	0.2412	0.3141	0.2521
Mean	0.3469	0.342	0.3313
Std. Deviation	0.05471	0.06536	0.05279
Std. Error of Mean	0.008343	0.01021	0.00762
Normality test
	10 DIV	14 DIV	21 DIV
Test for normal distribution
Anderson-Darling test
A2*	0.6663	2.128	0.73
P value	0.0763	<0,0001	0.0533
Passed normality test (alpha=0.05)?	Yes	No	Yes
P value summary	ns	****	ns
D'Agostino & Pearson test
K2	4.412	28.2	11.76
P value	0.1101	<0,0001	0.0028
Passed normality test (alpha=0.05)?	Yes	No	No
P value summary	ns	****	**
Shapiro-Wilk test
W	0.9543	0.8108	0.9255
P value	0.0854	<0,0001	0.0047
Passed normality test (alpha=0.05)?	Yes	No	No
P value summary	ns	****	**
Kolmogorov-Smirnov test
KS distance	0.1165	0.1699	0.1323
P value	>0,1000	0.0044	0.035
Passed normality test (alpha=0.05)?	Yes	No	No
P value summary	ns	**	*
Number of values	43	41	48
ANOVA Kruskal Wallis
Table Analyzed	cluster area
Kruskal-Wallis test
P value	0.2909
Exact or approximate P value?	Approximate
P value summary	ns
Do the medians vary signif. (P < 0.05)?	No
Number of groups	3
Kruskal-Wallis statistic	2.469
Data summary
Number of treatments (columns)	3
Number of values (total)	132
Number of families	1
Number of comparisons per family	3
Alpha	0.05
Dunn's multiple comparisons test	Mean rank diff,	Significant?	Summary	Adjusted P Value
10 DIV vs. 14 DIV	8.408	No	ns	0.9417	A-B
10 DIV vs. 21 DIV	12.45	No	ns	0.3631	A-C
14 DIV vs. 21 DIV	4.044	No	ns	>0,9999	B-C
Test details	Mean rank 1	Mean rank 2	Mean rank diff,	n1	n2	Z
10 DIV vs. 14 DIV	73.64	65.23	8.408	43	41	1.007
10 DIV vs. 21 DIV	73.64	61.19	12.45	43	48	1.55
14 DIV vs. 21 DIV	65.23	61.19	4.044	41	48	0.4972

## Sheet: Fig.1-S3E
cluster density
10 DIV	14 DIV	21 DIV
0.464154	0.409324	0.334924
0.415463	0.418448	0.266953
0.37284	0.376145	0.438921
0.413157	0.383178	0.504849
0.385106	0.38591	0.466393
0.433317	0.371495	0.441786
0.352139	0.355954	0.520719
0.410253	0.260412	0.499526
0.380106	0.218105	0.395119
0.34669	0.396904	0.146594
0.39109	0.380659	0.371843
0.444372	0.372889	0.490942
0.364977	0.397842	0.327451
0.431918	0.449446	0.386415
0.43085	0.345664	0.371835
0.44452	0.40446	0.350295
0.382438	0.416132	0.438304
0.403996	0.435843	0.382944
0.477024	0.436955	0.11754
0.450226	0.447773	0.39293
0.487591	0.38353	0.515836
0.377659	0.426852	0.44148
	0.406958	0.444232
	0.311484	0.427501
	0.421145	0.298665
	0.427219	0.482287
	0.40649	0.351071
	0.405295	0.388752
	0.425322	0.450803
	0.452522
	0.365374
0.416916	0.428531	0.477542
0.325963	0.461605	0.579861
0.30127	0.2979	0.452884
0.35492	0.324643	0.322617
0.299056	0.42615	0.382138
0.32945	0.475624	0.401887
0.375843	0.443078	0.291243
0.277117	0.421054	0.273675
0.296814	0.388726	0.382767
0.330196	0.425061	0.317392
0.264045		0.292187
0.430338		0.276275
0.278419		0.392202
0.380853		0.212987
0.2715		0.281794
0.433602		0.473537
0.364456		0.449181
0.320327		0.412561
0.346224		0.338687
0.311468
0.344212
Descriptive Statistics
	10 DIV	14 DIV	21 DIV
Number of values	43	41	48
Minimum	0.264	0.2181	0.1175
Maximum	0.4876	0.4756	0.5799
Range	0.2235	0.2575	0.4623
Mean	0.3747	0.3948	0.3845
Std. Deviation	0.05906	0.053	0.09535
Std. Error of Mean	0.009006	0.008277	0.01376
Normality Test
	10 DIV	14 DIV	21 DIV
Test for normal distribution
Anderson-Darling test
A2*	0.2718	1.334	0.4052
P value	0.6549	0.0016	0.3399
Passed normality test (alpha=0.05)?	Yes	No	Yes
P value summary	ns	**	ns
D'Agostino & Pearson test
K2	2.585	17.26	4.381
P value	0.2746	0.0002	0.1119
Passed normality test (alpha=0.05)?	Yes	No	Yes
P value summary	ns	***	ns
Shapiro-Wilk test
W	0.9758	0.891	0.97
P value	0.4906	0.0009	0.254
Passed normality test (alpha=0.05)?	Yes	No	Yes
P value summary	ns	***	ns
Kolmogorov-Smirnov test
KS distance	0.08266	0.1347	0.09408
P value	>0,1000	0.059	>0,1000
Passed normality test (alpha=0.05)?	Yes	Yes	Yes
P value summary	ns	ns	ns
Number of values	43	41	48
ANOVA Kruskall Wallis
Table Analyzed	cluster density
Kruskal-Wallis test
P value	0.2545
Exact or approximate P value?	Approximate
P value summary	ns
Do the medians vary signif. (P < 0.05)?	No
Number of groups	3
Kruskal-Wallis statistic	2.737
Data summary
Number of treatments (columns)	3
Number of values (total)	132
Number of families	1
Number of comparisons per family	3
Alpha	0.05
Dunn's multiple comparisons test	Mean rank diff,	Significant?	Summary	Adjusted P Value
10 DIV vs. 14 DIV	-13.21	No	ns	0.3407	A-B
10 DIV vs. 21 DIV	-9.788	No	ns	0.6689	A-C
14 DIV vs. 21 DIV	3.424	No	ns	>0,9999	B-C
Test details	Mean rank 1	Mean rank 2	Mean rank diff,	n1	n2	Z
10 DIV vs. 14 DIV	58.84	72.05	-13.21	43	41	1.582
10 DIV vs. 21 DIV	58.84	68.63	-9.788	43	48	1.219
14 DIV vs. 21 DIV	72.05	68.63	3.424	41	48	0.4209
