# Supplementary material for: MDGAs are fast-diffusing molecules that delay excitatory synapse development by altering neuroligin behavior
Source: eLife. 2022 May 9;11:e75233. doi: 10.7554/eLife.75233 (PMC9084894; doi:10.7554/eLife.75233)
Supplement: Figure 1—source data 8. — Each graph (G,H,J,K) is shown in a separate sheet within the file. [file elife-75233-fig1-data8.xlsx]

## Sheet: Fig.1G
Raw data
	Age in culture
each value corresponds to a different cell	7 DIV	14 DIV	21 DIV
three different cell cultures	71.42	14.81	57.74
	40	42.3	45.16
	42.1	9.75	10.71
	75	44.44	6.89
	28.57	22.64	6.66
	80	42.85	50
	42.85	47.36	71.42
	20	36.66	41.66
	11.11	23.07	5.55
	54.54	23.07	51.16
	3.22	58.82	37.8
	71.42	48.27	28.89
	60	54.54	21.5
		44.44	19.3
		43.75	27.49
		32	27.2
		4.34	14.08
		25.535	20.68
		35.18	24.83
		51.25	10
		42.81	40.89
		45.11	17.67
		30.56	28.94
		51.19	18.33
		62.73	31.37
		79.02	18.49
		57.43	27.65
		54.41	14.97
		49.08	18.95
		52.68	7.89
		53.51	9.42
		53.6	39.88
		55.95	9.61
		51.08	13.34
		32.96	24.22
			28.26
Descriptive Statistics
Age in culture	7 DIV	14 DIV	21 DIV
Number of values	13	35	36
Minimum	3.22	4.34	5.55
Maximum	80	79.02	71.42
Range	76.78	74.68	65.87
Mean	46.17	42.21	25.79
Std. Deviation	25.24	15.86	15.84
Std. Error of Mean	7.001	2.681	2.639
Statistical tests
Kruskal Wallis
Number of families	1
Number of comparisons per family	3
Alpha	0.05
Dunn's multiple comparisons test	Mean rank diff,	Significant?	Summary	Adjusted P Value
7 DIV vs. 14 DIV	1.316	No	ns	>0,9999	A-B
7 DIV vs. 21 DIV	23.76	Yes	**	0.0078	A-C
14 DIV vs. 21 DIV	22.44	Yes	***	0.0003	B-C
Test details	Mean rank 1	Mean rank 2	Mean rank diff,	n1	n2	Z
7 DIV vs. 14 DIV	53.23	51.91	1.316	13	35	0.1662
7 DIV vs. 21 DIV	53.23	29.47	23.76	13	36	3.01
14 DIV vs. 21 DIV	51.91	29.47	22.44	35	36	3.876

## Sheet: Fig.1H
Raw data
	Age in culture
each value corresponds to a different cell	7 DIV	14 DIV	21 DIV
from three different cell cultures	31.6117	12.4431	19.5648
	19.9066	21.1747	18.3978
	13.0222	21.8498	12.8582
	24.906	26.364	21.978
	10.0931	24.0113	10.8108
	44.5016	23.7692	30.621
	29.0476	10.9544	23.1477
	26.25	24.1651	28.649
	6.6666	22.5066	16.6666
	20.8119	14.3772	24.4599
	7.6923	17.13	31.065
	11.2892	13.9878	25.4513
	15.7063	14.244	28.4873
		15.412	33.1196
		18.1168	30.0139
		24.1288	31.5934
		8.3333	23.0839
		16.5678	31.8785
		35.6001	29.8453
		36.2781	27.871
		26.9388	42.7879
		26.0059	29.1679
		35.5012	36.012
		41.0362	30.8887
		39.2797	25.6488
		43.4975	18.8886
		33.4733	40.2341
		28.8432	25.9691
		35.974	34.2295
		40.2137	25.4166
		45.3099	20.2104
		41.2717	36.2308
		41.0108	23.9083
		30.5763	20.2301
		30.6914	31.1018
			29.5589
Descriptive Statistics
Age in culture	7 DIV	14 DIV	21 DIV
Number of values	13	35	36
Minimum	6.667	8.333	10.81
Maximum	44.5	45.31	42.79
Range	37.84	36.98	31.98
Mean	20.12	26.89	26.95
Std. Deviation	11	10.52	7.083
Std. Error of Mean	3.05	1.778	1.181
Statistical tests
Kruskal Wallis
Number of families	1
Number of comparisons per family	3
Alpha	0.05
Dunn's multiple comparisons test	Mean rank diff,	Significant?	Summary	Adjusted P Value
7 DIV vs. 14 DIV	-15.89	No	ns	0.1347	A-B
7 DIV vs. 21 DIV	-17.13	No	ns	0.09	A-C
14 DIV vs. 21 DIV	-1.238	No	ns	>0,9999	B-C
Test details	Mean rank 1	Mean rank 2	Mean rank diff,	n1	n2	Z
7 DIV vs. 14 DIV	28.54	44.43	-15.89	13	35	2.006
7 DIV vs. 21 DIV	28.54	45.67	-17.13	13	36	2.17
14 DIV vs. 21 DIV	44.43	45.67	-1.238	35	36	0.2138

## Sheet: Fig.1J
Raw data
	Age in culture
	10 DIV	14 DIV	21 DIV
	27.2727	25.8065	23.9167
	12.5	11.1111	28.9474
	7.14286	12.0482	25.6098
	6.81818	3.33333	39.1705
	19.0217	15.8824	5.12821
	7.69231	25	15.2778
	9.09091	6.66667	4.5977
	9.09091	20	10
	9.52381	31.97	45
	27.2727	35.25	50.9259
	13.33	37.97	34.2857
	12.5	30.11	35.2941
	20	30.06	8.03
	27.27	38.38	8.33
	8	42.35	5.08
	20	35.34	36.91
	18.18	31.26	41.61
	23.07	52.79	16.37		Normality Test
	2.85	31.2	39.08			10 DIV	14 DIV	21 DIV
	33.33	34.02	37.82		Test for normal distribution
	11.11	12.25	27.67		Anderson-Darling test
	36.84	42.54	22.56		A2*	0.5935	0.3999	0.3474
	27.27	52.29	24.73		P value	0.1107	0.3477	0.4649
	22.22	22.27	12.5		Passed normality test (alpha=0.05)?	Yes	Yes	Yes
	30	35.12	25.29		P value summary	ns	ns	ns
		43.26	21.11
		50.04	27.27		D'Agostino & Pearson test
		46.15	34.78		K2	2.894	5.598	1.288
		44.61	23.8		P value	0.2353	0.0609	0.5251
		15.38	36.17		Passed normality test (alpha=0.05)?	Yes	Yes	Yes
		5.06	44.7		P value summary	ns	ns	ns
		22.38	21.42
		8.33	40		Shapiro-Wilk test
		10.71	57.89		W	0.9411	0.9594	0.9665
		50	33.33		P value	0.1574	0.1495	0.1843
		23.07	36		Passed normality test (alpha=0.05)?	Yes	Yes	Yes
		20.83	21.42		P value summary	ns	ns	ns
		20	26.66
		4.54	18.18		Kolmogorov-Smirnov test
		8.33	9.09		KS distance	0.1556	0.08881	0.07389
		20.45	8.33		P value	>0,1000	>0,1000	>0,1000
			6.45		Passed normality test (alpha=0.05)?	Yes	Yes	Yes
			34.335		P value summary	ns	ns	ns
			62.5
			66.66		Number of values	25	41	48
			31.57
			46.66
			30
Descriptive statistics
Age in culture	10 DIV	14 DIV	21 DIV
Number of values	25	41	48
Minimum	2.85	3.333	4.598
Maximum	36.84	52.79	66.66
Range	33.99	49.46	62.06
Mean	17.66	27.03	28.38
Std. Deviation	9.501	14.56	15.22
Std. Error of Mean	1.9	2.274	2.197
Statistical tests
One-way ANOVA
Number of families	1
Number of comparisons per family	3
Alpha	0.05
Holm-Sidak's multiple comparisons test	Mean Diff,	Significant?	Summary	Adjusted P Value
10 DIV vs. 14 DIV	-9.372	Yes	*	0.0183	A-B
10 DIV vs. 21 DIV	-10.73	Yes	**	0.0068	A-C
14 DIV vs. 21 DIV	-1.356	No	ns	0.648	B-C
Test details	Mean 1	Mean 2	Mean Diff,	SE of diff,	n1	n2	t	DF
10 DIV vs. 14 DIV	17.66	27.03	-9.372	3.535	25	41	2.651	111
10 DIV vs. 21 DIV	17.66	28.38	-10.73	3.436	25	48	3.122	111
14 DIV vs. 21 DIV	27.03	28.38	-1.356	2.963	41	48	0.4578	111

## Sheet: Fig.1K
Raw data
	Age in culture
	10 DIV	14 DIV	21 DIV
	12.1795	14.6538	25.9806
	25	40.7143	16.6399
	25	17.4643	18.0455
	19.1667	18.8034	29.867
	11.1111	31.9949	13.0952
	11.1111	24.4444	32.4864
	17.8571	29.9124	36.7827
	21.2589	11.1111	13.9208
	16.6667	24.2967	27.8713
	22.4542	29.5507	35.2736
	5.6938	36.3872	25.0024
	8.3333	26.3598	28.0652
	3.2258	24.303	27.9547
	6.7129	33.7464	16.2231
	7.873	27.5673	18.2874
	33.3333	33.4965	32.5103
	16.6666	26.507	27.0734
	11.2433	29.1066	18.1315
	7.6923	37.1882	30.4347		Normality test
	12.4448	23.5904	23.271			10 DIV	14 DIV	21 DIV
	11.5	24.9097	26.369		Test for normal distribution
	31.6711	24.0575	30.7176		Anderson-Darling test
	13.0952	31.273	33.3265		A2*	0.5399	0.4356	0.6143
	4.8597	32.9225	37.1666		P value	0.1488	0.2854	0.1039
		31.1558	28.9384		Passed normality test (alpha=0.05)?	Yes	Yes	Yes
		29.2872	32.466		P value summary	ns	ns	ns
		29.3494	22.9256
		30.6431	12.7882		D'Agostino & Pearson test
		48.367	20.6837		K2	2.652	0.06518	13.15
		27.7853	20.6384		P value	0.2656	0.9679	0.0014
		17.4242	11.1996		Passed normality test (alpha=0.05)?	Yes	Yes	No
		16.5631	28.3253		P value summary	ns	ns	**
		14.4039	13.5101
		6.8333	12.8707		Shapiro-Wilk test
		10.9518	26.362		W	0.9353	0.9753	0.9317
		12.5075	13.8336		P value	0.1281	0.4901	0.0078
		16.662	24.1161		Passed normality test (alpha=0.05)?	Yes	Yes	No
		11.9569	12.9706		P value summary	ns	ns	**
		27.2045	16.0516
		15.3273	16.6693		Kolmogorov-Smirnov test
		22.2222	11.1658		KS distance	0.1672	0.1001	0.1055
		9.2787	25.0644		P value	0.0811	>0,1000	>0,1000
			17.359		Passed normality test (alpha=0.05)?	Yes	Yes	Yes
			6.495		P value summary	ns	ns	ns
			60
			5.0776		Number of values	24	42	48
			12.7083
			10.2424
Descriptive Statistics
Age in culture	10 DIV	14 DIV	21 DIV
Number of values	24	42	48
Minimum	3.226	6.833	5.078
Maximum	33.33	48.37	60
Range	30.11	41.53	54.92
Mean	14.84	24.58	22.64
Std. Deviation	8.234	9.196	10.03
Std. Error of Mean	1.681	1.419	1.448
Statistical tests
One-way ANOVA
Number of families	1
Number of comparisons per family	3
Alpha	0.05
Holm-Sidak's multiple comparisons test	Mean Diff,	Significant?	Summary	Adjusted P Value
10 DIV vs. 14 DIV	-9.739	Yes	***	0.0003	A-B
10 DIV vs. 21 DIV	-7.805	Yes	**	0.0024	A-C
14 DIV vs. 21 DIV	1.933	No	ns	0.3312	B-C
Test details	Mean 1	Mean 2	Mean Diff,	SE of diff,	n1	n2	t	DF
10 DIV vs. 14 DIV	14.84	24.58	-9.739	2.399	24	42	4.059	111
10 DIV vs. 21 DIV	14.84	22.64	-7.805	2.344	24	48	3.33	111
14 DIV vs. 21 DIV	24.58	22.64	1.933	1.981	42	48	0.9759	111
