# Supplementary material for: MDGAs are fast-diffusing molecules that delay excitatory synapse development by altering neuroligin behavior
Source: eLife. 2022 May 9;11:e75233. doi: 10.7554/eLife.75233 (PMC9084894; doi:10.7554/eLife.75233)
Supplement: Figure 2—figure supplement 1—source data 7. — Each graph (C,D) is shown in a separate sheet within the file. [file elife-75233-fig2-figsupp1-data7.xlsx]

## Sheet: Fig.2-S1C
HA-MDGA1	shMDGA1 2ug	shMDGA1 6ug	shMDGA1 6ug	HA-MDGA1 res	HA-MDGA1 res+ shMDGA1 6ug	HA-MDGA2	HA-MDGA2 + shMDGA1 6ug
100	21.0499	42.8777	43.2301	100.55	129.692	100	100.317
100	54.0793	52.4682	51.6716	134.834	113.185	100	62.5
Number of families	1
Number of comparisons per family	7
Alpha	0.05
Dunnett's multiple comparisons test	Mean Diff,	95,00% CI of diff,	Significant?	Summary	Adjusted P Value	A-?
HA-MDGA1 vs. shMDGA1 2ug	62.44	9,534 to 115,3	Yes	*	0.022	B	shMDGA1 2ug
HA-MDGA1 vs. shMDGA1 6ug	52.33	-0,5739 to 105,2	No	ns	0.0526	C	shMDGA1 6ug
HA-MDGA1 vs. shMDGA1 6ug	52.55	-0,3518 to 105,5	No	ns	0.0515	D	shMDGA1 6ug
HA-MDGA1 vs. HA-MDGA1 res	-17.69	-70,59 to 35,21	No	ns	0.791	E	HA-MDGA1 res
HA-MDGA1 vs. Column F	-21.44	-74,34 to 31,46	No	ns	0.6504	F	Column F
HA-MDGA1 vs. HA-MDGA2	0	-52,90 to 52,90	No	ns	>0,9999	G	HA-MDGA2
HA-MDGA1 vs. Column H	18.59	-34,31 to 71,49	No	ns	0.7584	H	Column H
Test details	Mean 1	Mean 2	Mean Diff,	SE of diff,	n1	n2	q	DF
HA-MDGA1 vs. shMDGA1 2ug	100	37.56	62.44	16.07	2	2	3.885	8
HA-MDGA1 vs. shMDGA1 6ug	100	47.67	52.33	16.07	2	2	3.256	8
HA-MDGA1 vs. shMDGA1 6ug	100	47.45	52.55	16.07	2	2	3.27	8
HA-MDGA1 vs. HA-MDGA1 res	100	117.7	-17.69	16.07	2	2	1.101	8
HA-MDGA1 vs. Column F	100	121.4	-21.44	16.07	2	2	1.334	8
HA-MDGA1 vs. HA-MDGA2	100	100	0	16.07	2	2	0	8
HA-MDGA1 vs. Column H	100	81.41	18.59	16.07	2	2	1.157	8

## Sheet: Fig.2-S1D
HA-MDGA2	shMDGA2 2ug	shMDGA2 4ug	shMDGA2 6ug	HA MDGA2 res	HA MDGA2 res + shMDGA2 6ug	HA-MDGA1	HA-MDGA1 + shMDGA2 6ug
100	90.45	24.5422	10.228	100	107	100	143
100	57.8993	33.5648	18.8802	100	110	100	107.156
Kruskal Wallis
Number of families	1
Number of comparisons per family	7
Alpha	0.05
Dunnett's multiple comparisons test	Mean Diff,	95,00% CI of diff,	Significant?	Summary	Adjusted P Value	A-?
HA-MDGA2 vs. shMDGA2 2ug	25.83	-15,40 to 67,05	No	ns	0.2782	B	shMDGA2 2ug
HA-MDGA2 vs. shMDGA2 4ug	70.95	29,72 to 112,2	Yes	**	0.0024	C	shMDGA2 4ug
HA-MDGA2 vs. shMDGA2 6ug	85.45	44,22 to 126,7	Yes	***	0.0007	D	shMDGA2 6ug
HA-MDGA2 vs. HA MDGA2 res	0	-41,23 to 41,23	No	ns	>0,9999	E	HA MDGA2 res
HA-MDGA2 vs. Column F	-8.5	-49,73 to 32,73	No	ns	0.9678	F	Column F
HA-MDGA2 vs. HA-MDGA1	0	-41,23 to 41,23	No	ns	>0,9999	G	HA-MDGA1
HA-MDGA2 vs. Column H	-25.08	-66,30 to 16,15	No	ns	0.3008	H	Column H
Test details	Mean 1	Mean 2	Mean Diff,	SE of diff,	n1	n2	q	DF
HA-MDGA2 vs. shMDGA2 2ug	100	74.17	25.83	12.52	2	2	2.062	8
HA-MDGA2 vs. shMDGA2 4ug	100	29.05	70.95	12.52	2	2	5.665	8
HA-MDGA2 vs. shMDGA2 6ug	100	14.55	85.45	12.52	2	2	6.823	8
HA-MDGA2 vs. HA MDGA2 res	100	100	0	12.52	2	2	0	8
HA-MDGA2 vs. Column F	100	108.5	-8.5	12.52	2	2	0.6787	8
HA-MDGA2 vs. HA-MDGA1	100	100	0	12.52	2	2	0	8
HA-MDGA2 vs. Column H	100	125.1	-25.08	12.52	2	2	2.002	8
