# Supplementary material for: MDGAs are fast-diffusing molecules that delay excitatory synapse development by altering neuroligin behavior
Source: eLife. 2022 May 9;11:e75233. doi: 10.7554/eLife.75233 (PMC9084894; doi:10.7554/eLife.75233)
Supplement: Figure 2—figure supplement 2—source data 1. — Each graph (C,D,E) is shown in a separate sheet within the file. [file elife-75233-fig2-figsupp2-data1.xlsx]

## Sheet: Fig.2-S2C
non electro	shCTRL	shMDGA1
0.672311	0.975421	0.179727
2.45804	0.541558	0.311702
1.06505	1.0995	0.393468
0.955709	0.539338	0.206288
0.819851	0.623519	0.754534
1.73609	0.309134	0.335833
1.01465	1.36708	0.096192
1.5042	1.55469	0.107039
1.5973	0.448543	0.240821
0.817814	0.786908	0.0971907
0.618449	1.41268	0.412357
1.01689	0.988089	0.16753
1.53866	0.532804	0.0367534
1.38636	0.934837	0.649737
1.15525	0.622166	0.0363002
0.80798	0.505934	0.0559809
0.844682	0.551973	0.18224
0.530009	1.13971	0.512081
	0.559338	0.0416904
	0.491373	0.342802
1.22566	1.97372	0.282805
1.9398	0.669117	0.411684
0.617106	0.83011	0.0769213
1.04503	1.46294	0.410318
0.733746	1.15776	0.522455
0.487609	1.6898	0.132592
0.928123	0.988777	0.154257
1.95706	1.45039	0.183048
0.538702	0.26652	0.327038
1.59625	0.388728	0.362966
1.01863	0.828226	0.20189
1.46826	0.926941	0.171907
0.82247	0.491714	0.0796581
1.13854	0.595603	0.272082
0.471777	0.932177	0.214939
0.604947	0.91537	0.18193
0.561738	0.73811	0.159048
0.603013	1.04473	0.0142042
1.1737	0.452934	0.0469118
0.841749	1.17864	0.310121
1.01629	0.530936	0.566571
0.681001	0.790145	0.0696908
0.592199	1.14895	0.124634
0.397309	0.594624	0.167713
	0.588507	0.258193
	1.09247	0.0333398
	1.18959	0.174928
	1.0064	0.251443
	1.23553	0.343905
	0.58573	0.0787335
		0.0945058
		0.181652
		0.27353
		0.145149
		0.396024
		0.204072
		0.269004
		0.194367
		0.135042
		0.0486554
		0.0933035
		0.491715
Descriptive Statistics
	non electro	shCTRL	shMDGA1
Number of values	42	50	62
Minimum	0.3973	0.2665	0.0142
Maximum	2.458	1.974	0.7545
Range	2.061	1.707	0.7403
Mean	1.024	0.8746	0.2302
Std. Deviation	0.4678	0.383	0.1614
Std. Error of Mean	0.07219	0.05417	0.0205
Normality Test
	non electro	shCTRL	shMDGA1
Test for normal distribution
Anderson-Darling test
A2*	1.064	0.8264	1.339
P value	0.0076	0.0306	0.0016
Passed normality test (alpha=0.05)?	No	No	No
P value summary	**	*	**
D'Agostino & Pearson test
K2	8.999	4.382	12.88
P value	0.0111	0.1118	0.0016
Passed normality test (alpha=0.05)?	No	Yes	No
P value summary	*	ns	**
Shapiro-Wilk test
W	0.9152	0.9487	0.9187
P value	0.0042	0.0303	0.0005
Passed normality test (alpha=0.05)?	No	No	No
P value summary	**	*	***
Kolmogorov-Smirnov test
KS distance	0.1315	0.1439	0.1396
P value	0.0653	0.0113	0.0043
Passed normality test (alpha=0.05)?	Yes	No	No
P value summary	ns	*	**
Number of values	42	50	62
ANOVA - Krusall Wallis
Table Analyzed	Data 1
Kruskal-Wallis test
P value	<0,0001
Exact or approximate P value?	Approximate
P value summary	****
Do the medians vary signif. (P < 0.05)?	Yes
Number of groups	3
Kruskal-Wallis statistic	99.81
Data summary
Number of treatments (columns)	3
Number of values (total)	154
Number of families	1
Number of comparisons per family	3
Alpha	0.05
Dunn's multiple comparisons test	Mean rank diff,	Significant?	Summary	Adjusted P Value
non electro vs. shCTRL	9.715	No	ns	0.894	A-B
non electro vs. shMDGA1	78.1	Yes	****	<0,0001	A-C
shCTRL vs. shMDGA1	68.38	Yes	****	<0,0001	B-C
Test details	Mean rank 1	Mean rank 2	Mean rank diff,	n1	n2	Z
non electro vs. shCTRL	112.1	102.4	9.715	42	50	1.041
non electro vs. shMDGA1	112.1	34	78.1	42	62	8.762
shCTRL vs. shMDGA1	102.4	34	68.38	50	62	8.066

## Sheet: Fig.2-S2D
non electro	shCTRL	shMDGA1
0.189452	3.01111	0.528831
0.149558	1.78603	1.22088
0.167414	2.37421	0.647327
0.0421282	2.20442	0.515644
0.657564	5.27752	0.752012
1.9298	4.90757	0.641381
2.16033	3.63944	0.402054
1.2506	2.57131	0.826048
1.31668	3.11254	1.05476
0.328536	0.0462442	1.24481
0.409735	2.26596	1.68538
0.488926	5.40231	0.940849
0.378876	0.99046	1.07386
0.369817	1.01753	1.01984
0.783839	2.71325	1.69388
1.14038	3.72168	0.784653
0.446178	1.28084	2.80548
1.49658	1.44944	4.04157
0.752491	1.17988	1.79801
1.76654	3.46949
0.790036
1.66564
0.609818
0.64566
1.88457
2.56951
0.647503
1.03747
1.81058
1.99789
0.586499
1.52938
2.65758		2.54675
1.21377		1.03294
1.45202	4.61777	0.798277
0.753247	3.76727	0.822481
0.44643	3.0794	1.40083
0.563728	0.751018	0.370713
1.37969	3.26394	1.0314
0.36933	1.43164	2.3215
0.731992	0.373663	1.1009
1.96883	1.26463	1.77016
0.379569	0.277407	2.75765
1.37226	0.910148	1.37075
1.16166	7.28543	1.77482
0.574656	5.34821	0.999155
1.07577	2.57391	3.64204
1.12277	2.91479	1.82252
1.05231	3.65209	0.975528
0.796034	4.89011	3.19102
0.559478	0.901973	3.14904
0.359543	0.432949	0.975385
0.3386	2.51959	1.06681
0.758705	1.70746	2.84995
2.1694	2.35226	3.12919
1.34112	1.2535	2.33296
1.05305	2.46818	1.8998
1.83555	3.50825	1.89508
0.625497	1.64102	1.47358
1.52159	1.16955	1.88697
1.02906	3.94506	1.02898
0.667171	0.81453	2.7171
1.20888	3.3892	0.961791
0.854663	1.12514	1.95297
0.906455	0.762832	0.471488
0.842409	2.91963	0.615571
0.667024	1.90406
0.19015	1.75769
	4.44461
	1.35068
	4.48006
Descriptive Statistics
	non electro	shCTRL	shMDGA1
Number of values	68	57	53
Minimum	0.04213	0.04624	0.3707
Maximum	2.658	7.285	4.042
Range	2.615	7.239	3.671
Mean	1	2.521	1.544
Std. Deviation	0.6159	1.57	0.906
Std. Error of Mean	0.07468	0.208	0.1244
Normality Test
	non electro	shCTRL	shMDGA1
Test for normal distribution
Anderson-Darling test
A2*	1.164	0.7005	1.734
P value	0.0045	0.0638	0.0002
Passed normality test (alpha=0.05)?	No	Yes	No
P value summary	**	ns	***
D'Agostino & Pearson test
K2	5.945	4.658	7.215
P value	0.0512	0.0974	0.0271
Passed normality test (alpha=0.05)?	Yes	Yes	No
P value summary	ns	ns	*
Shapiro-Wilk test
W	0.9446	0.9547	0.9074
P value	0.0045	0.0322	0.0006
Passed normality test (alpha=0.05)?	No	No	No
P value summary	**	*	***
Kolmogorov-Smirnov test
KS distance	0.1297	0.1033	0.178
P value	0.0063	>0,1000	0.0002
Passed normality test (alpha=0.05)?	No	Yes	No
P value summary	**	ns	***
Number of values	68	57	53
ANOVA Kruskal Wallis
Table Analyzed	333
Kruskal-Wallis test
P value	<0,0001
Exact or approximate P value?	Approximate
P value summary	****
Do the medians vary signif. (P < 0.05)?	Yes
Number of groups	3
Kruskal-Wallis statistic	23.68
Data summary
Number of treatments (columns)	3
Number of values (total)	108
Number of families	1
Number of comparisons per family	3
Alpha	0.05
Dunn's multiple comparisons test	Mean rank diff,	Significant?	Summary	Adjusted P Value
non electro vs. shCTRL	-34.95	Yes	****	<0,0001	A-B
non electro vs. shMDGA1	-23.23	Yes	**	0.0058	A-C
shCTRL vs. shMDGA1	11.72	No	ns	0.3384	B-C
Test details	Mean rank 1	Mean rank 2	Mean rank diff,	n1	n2	Z
non electro vs. shCTRL	34.89	69.84	-34.95	36	38	4.798
non electro vs. shMDGA1	34.89	58.12	-23.23	36	34	3.101
shCTRL vs. shMDGA1	69.84	58.12	11.72	38	34	1.586

## Sheet: Fig.2-S2E
shCTRL	shMDGA2
100	70
100	56
100	57
100	74
unpaired t test
Table Analyzed
Column B	shMDGA2
vs.	vs,
Column A	shCTRL
Unpaired t test
P value	0.0002
P value summary	***
Significantly different (P < 0.05)?	Yes
One- or two-tailed P value?	Two-tailed
t, df	t=7,852, df=6
How big is the difference?
Mean of column A	100
Mean of column B	64.25
Difference between means (B - A) ± SEM	-35,75 ± 4,553
95% confidence interval	-46,89 to -24,61
R squared (eta squared)	0.9113
F test to compare variances
F, DFn, Dfd	Infinity, 3, 3
P value	<0,0001
P value summary	****
Significantly different (P < 0.05)?	Yes
Data analyzed
Sample size, column A	4
Sample size, column B	4
