# Supplementary material for: MDGAs are fast-diffusing molecules that delay excitatory synapse development by altering neuroligin behavior
Source: eLife. 2022 May 9;11:e75233. doi: 10.7554/eLife.75233 (PMC9084894; doi:10.7554/eLife.75233)
Supplement: Figure 2—source data 1. — Each graph (B,D) is shown in a separate sheet within the file. [file elife-75233-fig2-data1.xlsx]

## Sheet: Fig.2B
Raw data
	AP-MDGA1	AP-MDGA2	GFP-GPI	AP-NLGN1
Each value corresponds to a different cell	0.996537	1.63849	1.20841	1.51524
from three different cell cultures	1.51473	0.679667	1.8936	2.42026
	0.829056	0.805978	1.64088	3.7707
	1.47545	1.6804	1.4329	1.89953
	2.10378	1.41496	0.815181	2.31972
	0.742904		1.27642	1.98813
	1.49481		1.34903	2.50701
	1.36969		1.44654	2.37088
	1.72035		1.0389	1.61361
			1.1744
			0.641223
			1.03299
Descriptive Statistics
	AP-MDGA1	AP-MDGA2	GFP-GPI	AP-NLGN1
Number of values	9	5	12	9
Minimum	0.7429	0.6797	0.6412	1.515
Maximum	2.104	1.68	1.894	3.771
Range	1.361	1.001	1.252	2.255
Mean	1.361	1.244	1.246	2.267
Std. Deviation	0.4378	0.4705	0.3449	0.6671
Std. Error of Mean	0.1459	0.2104	0.09955	0.2224
Statistical tests
Kruskal Wallis
Number of families	1
Number of comparisons per family	6
Alpha	0.05
Dunn's multiple comparisons test	Mean rank diff,	Significant?	Summary	Adjusted P Value
AP-MDGA1 vs. AP-MDGA2	2.089	No	ns	>0,9999	A-B
AP-MDGA1 vs. GFP-GPI	3.139	No	ns	>0,9999	A-C
AP-MDGA1 vs. AP-NLGN1	-13.56	Yes	*	0.0301	A-D
AP-MDGA2 vs. GFP-GPI	1.05	No	ns	>0,9999	B-C
AP-MDGA2 vs. AP-NLGN1	-15.64	Yes	*	0.0372	B-D
GFP-GPI vs. AP-NLGN1	-16.69	Yes	**	0.0013	C-D
Test details	Mean rank 1	Mean rank 2	Mean rank diff,	n1	n2	Z
AP-MDGA1 vs. AP-MDGA2	15.89	13.8	2.089	9	5	0.3655
AP-MDGA1 vs. GFP-GPI	15.89	12.75	3.139	9	12	0.6947
AP-MDGA1 vs. AP-NLGN1	15.89	29.44	-13.56	9	9	2.806
AP-MDGA2 vs. GFP-GPI	13.8	12.75	1.05	5	12	0.1925
AP-MDGA2 vs. AP-NLGN1	13.8	29.44	-15.64	5	9	2.737
GFP-GPI vs. AP-NLGN1	12.75	29.44	-16.69	12	9	3.695

## Sheet: Fig.2D
AP-MDGA1	AP-MDGA2	GFP-GPI	AP-NLGN1
1.51271	0.947103	1.35149	1.32949		each value corresponds to a different cell
0.826704	1.75859	1.98532	2.93624		three different cell cultures
1.15087	2.0157	1.02368	4.00605
1.6615	1.36158	1.84624	1.69727
1.74489	1.65615	1.07434	1.74914
1.33033	0.95436	1.51055	2.37822
1.22171	1.37914	1.65846	1.90911
2.51615	1.27197	1.43307	2.65124
1.81237	2.42464	1.09027	2.55342
1.33871	1.64794	1.89725	5.43055
		1.16997	3.72022
		1.75346	1.98618
		1.59956	3.0922
		0.982393
		1.07105
		0.946549
Descriptive Statistics
	AP-MDGA1	AP-MDGA2	GFP-GPI	AP-NLGN1
Number of values	10	10	16	13
Minimum	0.8267	0.9471	0.9465	1.329
Maximum	2.516	2.425	1.985	5.431
Range	1.689	1.478	1.039	4.101
Mean	1.512	1.542	1.4	2.726
Std. Deviation	0.4622	0.4602	0.3579	1.135
Std. Error of Mean	0.1462	0.1455	0.08946	0.3147
Kruskal Wallis test
Number of families	1
Number of comparisons per family	6
Alpha	0.05
Dunn's multiple comparisons test	Mean rank diff,	Significant?	Summary	Adjusted P Value
AP-MDGA1 vs. AP-MDGA2	-1.1	No	ns	>0,9999	A-B
AP-MDGA1 vs. GFP-GPI	2.45	No	ns	>0,9999	A-C
AP-MDGA1 vs. AP-NLGN1	-18.38	Yes	*	0.0134	A-D
AP-MDGA2 vs. GFP-GPI	3.55	No	ns	>0,9999	B-C
AP-MDGA2 vs. AP-NLGN1	-17.28	Yes	*	0.0243	B-D
GFP-GPI vs. AP-NLGN1	-20.83	Yes	***	0.0006	C-D
Test details	Mean rank 1	Mean rank 2	Mean rank diff,	n1	n2	Z
AP-MDGA1 vs. AP-MDGA2	20.7	21.8	-1.1	10	10	0.1721
AP-MDGA1 vs. GFP-GPI	20.7	18.25	2.45	10	16	0.4254
AP-MDGA1 vs. AP-NLGN1	20.7	39.08	-18.38	10	13	3.058
AP-MDGA2 vs. GFP-GPI	21.8	18.25	3.55	10	16	0.6163
AP-MDGA2 vs. AP-NLGN1	21.8	39.08	-17.28	10	13	2.875
GFP-GPI vs. AP-NLGN1	18.25	39.08	-20.83	16	13	3.904
