# Supplementary material for: MDGAs are fast-diffusing molecules that delay excitatory synapse development by altering neuroligin behavior
Source: eLife. 2022 May 9;11:e75233. doi: 10.7554/eLife.75233 (PMC9084894; doi:10.7554/eLife.75233)
Supplement: Figure 3—source data 1. — Each graph (B,D,F,G,H) is shown in a separate sheet within the file. [file elife-75233-fig3-data1.xlsx]

## Sheet: Fig.3B
Diffusion coefficient (µm²/s)	AP-MDGA1		AP-MDGA2		GFP-GPI
in log scale	Mean	SEM	Mean	SEM	Mean	SEM		Mean and SEM of n > 10 cells in each condition
-5	11.81	0.7341	11.44	0.6786	9.798	0.9086
-4.9	0.004252	0.004252	0.002386	0.002386	0.003186	0.003186
-4.8	0.00289	0.002075	0	0	0.002447	0.002447
-4.7	0.007434	0.004862	0.008872	0.00743	0.01136	0.006495
-4.6	0.001044	0.001044	0.01259	0.008991	0.01283	0.006655
-4.5	0.004072	0.002908	0.01336	0.009655	0.01656	0.007229
-4.4	0.00994	0.005688	0.0329	0.01218	0.02155	0.006988
-4.3	0.003913	0.003913	0.007818	0.005531	0.01904	0.01152
-4.2	0.01758	0.006494	0.009594	0.008138	0.008964	0.006528
-4.1	0.02291	0.01097	0.02254	0.0102	0.03567	0.01122
-4	0.02937	0.008074	0.02208	0.01062	0.04974	0.01617
-3.9	0.04555	0.0121	0.03509	0.01801	0.03868	0.0129
-3.8	0.0329	0.01177	0.05641	0.02287	0.06428	0.01982
-3.7	0.05244	0.01364	0.06561	0.02936	0.08509	0.01513
-3.6	0.07384	0.01544	0.09228	0.03034	0.1328	0.0197
-3.5	0.089	0.01923	0.104	0.03523	0.1771	0.03237
-3.4	0.134	0.02459	0.0925	0.02299	0.1546	0.02429
-3.3	0.1484	0.01828	0.1579	0.02965	0.2186	0.04588
-3.2	0.1466	0.02253	0.1683	0.0358	0.2795	0.03347
-3.1	0.2189	0.03289	0.1754	0.04088	0.374	0.04962
-3	0.2896	0.04364	0.2758	0.0433	0.3902	0.09236
-2.9	0.3921	0.04803	0.277	0.0544	0.4334	0.06782
-2.8	0.4812	0.06081	0.3683	0.05366	0.5995	0.06659
-2.7	0.5733	0.05482	0.4976	0.07842	0.6531	0.1199
-2.6	0.6684	0.06775	0.5891	0.08934	0.7107	0.0908
-2.5	0.8029	0.09194	0.7875	0.1181	0.8578	0.1137
-2.4	1.041	0.08758	0.9666	0.1012	1.111	0.1005
-2.3	1.199	0.112	1.028	0.128	1.119	0.1355
-2.2	1.528	0.1597	0.9703	0.1133	1.351	0.1413
-2.1	1.652	0.1026	1.15	0.1055	1.449	0.1323
-2	1.758	0.1224	1.296	0.1005	1.591	0.1532
-1.9	2.064	0.1532	1.288	0.1165	1.793	0.1385
-1.8	2.256	0.1565	1.454	0.1413	1.798	0.1732
-1.7	2.415	0.1616	1.661	0.1481	2.225	0.119
-1.6	2.649	0.2022	1.881	0.1728	2.606	0.1249
-1.5	2.933	0.1565	1.937	0.1776	2.653	0.1304
-1.4	3.278	0.2031	2.277	0.1821	2.799	0.1985
-1.3	3.385	0.2033	2.469	0.1693	3.273	0.1129
-1.2	4.058	0.2053	2.582	0.1907	3.237	0.1998
-1.1	4.593	0.2371	3.167	0.2436	4.077	0.1657
-1	4.588	0.2213	3.692	0.2544	3.986	0.1554
-0.9	5.042	0.2537	4.354	0.1961	4.598	0.2052
-0.8	5.29	0.2507	4.717	0.2011	5.345	0.2243
-0.7	5.649	0.2531	5.233	0.265	5.64	0.2567
-0.6	5.609	0.3354	6.301	0.3137	5.732	0.2981
-0.5	5.149	0.2887	6.119	0.2759	5.59	0.3315
-0.4	4.974	0.347	6.295	0.2936	5.682	0.3274
-0.3	4.192	0.3886	6.451	0.4356	4.92	0.4073
-0.2	3.139	0.343	5.486	0.4218	4.332	0.3467
-0.1	2.349	0.2569	4.787	0.4117	3.209	0.2397
0	1.524	0.2161	3.436	0.36	2.368	0.2925
0.1	0.909	0.1553	1.856	0.2225	1.346	0.1929
0.2	0.4302	0.07192	1.11	0.1919	0.5967	0.08167
0.3	0.209	0.06042	0.4576	0.1209	0.3075	0.06861
0.4	0.04692	0.01334	0.199	0.04711	0.07872	0.01515
0.5	0.02197	0.008677	0.05264	0.02718	0.03807	0.01206
0.6	0.006532	0.004723	0.009448	0.009448	0.002447	0.002447
0.7	0	0	0.005915	0.005915	0	0
0.8	0	0	0	0	0	0
0.9	0	0	0	0	0	0
1	0	0	0	0	0	0

## Sheet: Fig.3D
Diffusion coefficient (µm²/s)	AP-MDGA1		AP-MDGA2		GFP-GPI
in log scale	Mean	SEM	Mean	SEM	Mean	SEM		Mean and SEM of n > 10 cells in each condition
-5	17.39	1.258	15.64	0.894	7.377	0.5869
-4.9	0.01375	0.01017	0.007333	0.007333	0.007216	0.003832
-4.8	0.01847	0.01305	0.02861	0.01529	0.002919	0.002053
-4.7	0.0429	0.02133	0.003837	0.003837	0.01667	0.006723
-4.6	0.03313	0.01408	0.01973	0.01051	0.01091	0.00406
-4.5	0.01891	0.01095	0.0273	0.01188	0.01775	0.00615
-4.4	0.0527	0.02354	0.01404	0.00863	0.01706	0.004537
-4.3	0.01708	0.008266	0.04571	0.02143	0.02969	0.007008
-4.2	0.04713	0.02127	0.03715	0.02242	0.04642	0.01597
-4.1	0.04845	0.01706	0.04602	0.02019	0.04847	0.009171
-4	0.05682	0.03169	0.06274	0.01935	0.0579	0.01378
-3.9	0.1404	0.03148	0.09269	0.01724	0.06463	0.01752
-3.8	0.1394	0.0402	0.108	0.03054	0.08993	0.01725
-3.7	0.1449	0.04526	0.1346	0.02955	0.1323	0.02325
-3.6	0.137	0.02933	0.1625	0.03716	0.1388	0.02201
-3.5	0.2122	0.04004	0.2244	0.04376	0.1564	0.01901
-3.4	0.2305	0.03871	0.3034	0.04157	0.2497	0.03493
-3.3	0.3738	0.05188	0.3644	0.05231	0.3262	0.03996
-3.2	0.482	0.1074	0.3907	0.06735	0.3475	0.05047
-3.1	0.6293	0.04734	0.6926	0.0971	0.4303	0.05362
-3	0.6827	0.08659	0.6276	0.09428	0.4462	0.06537
-2.9	0.6872	0.07648	0.7989	0.06882	0.6034	0.07846
-2.8	1.05	0.08279	0.9016	0.04721	0.644	0.07531
-2.7	1.282	0.1453	1.133	0.1282	0.7602	0.07058
-2.6	1.351	0.1572	1.358	0.1426	0.8426	0.09589
-2.5	1.72	0.1026	1.399	0.154	0.9028	0.07102
-2.4	1.606	0.1533	1.662	0.141	0.9024	0.07464
-2.3	1.876	0.13	1.714	0.1144	1.052	0.11
-2.2	2.144	0.1645	1.903	0.1857	1.27	0.1179
-2.1	2.109	0.2201	1.843	0.1598	1.274	0.1012
-2	2.297	0.1426	1.946	0.1553	1.34	0.1449
-1.9	2.122	0.1652	1.885	0.1865	1.627	0.1735
-1.8	2.127	0.1809	2.141	0.1221	1.602	0.1554
-1.7	2.112	0.1583	1.911	0.1384	1.627	0.1395
-1.6	1.95	0.1225	2.009	0.1545	1.939	0.1871
-1.5	2.414	0.1494	2.126	0.1453	2.199	0.2141
-1.4	2.449	0.1646	2.234	0.1665	2.501	0.2052
-1.3	2.576	0.1779	2.434	0.2411	2.7	0.2132
-1.2	3.008	0.1339	2.699	0.1885	3.092	0.2352
-1.1	3.313	0.2239	3.079	0.1908	3.395	0.2329
-1	3.222	0.2723	3.546	0.2864	3.836	0.1814
-0.9	3.844	0.2359	3.671	0.1025	4.419	0.1755
-0.8	4.054	0.3121	3.95	0.228	4.856	0.1665
-0.7	4.548	0.4158	4.272	0.1634	5.548	0.1435
-0.6	4.166	0.2507	4.757	0.2377	5.843	0.2473
-0.5	4.644	0.3155	4.821	0.2961	6.179	0.276
-0.4	3.889	0.3567	4.666	0.4956	6.608	0.4297
-0.3	3.648	0.3099	4.26	0.33	6.437	0.416
-0.2	2.937	0.3619	3.92	0.4435	5.519	0.4477
-0.1	2.543	0.3061	3.179	0.4327	4.394	0.3729
0	1.644	0.2408	2.093	0.3328	2.927	0.2677
0.1	0.8931	0.1722	1.412	0.2615	1.808	0.1704
0.2	0.5471	0.1125	0.7269	0.167	0.8265	0.08533
0.3	0.2264	0.0606	0.365	0.0794	0.3319	0.05652
0.4	0.04799	0.02042	0.111	0.03948	0.1325	0.02521
0.5	0.03538	0.01517	0.03476	0.01622	0.03336	0.007451
0.6	0.009579	0.009579	0.002174	0.002174	0.01031	0.005933
0.7	0	0	0	0	0.003082	0.002266
0.8	0	0	0	0	0	0
0.9	0	0	0	0	0	0
1	0	0	0	0	0	0

## Sheet: Fig.3F
Diffusion coefficient (µm²/s)	AP-MDGA1		AP-MDGA2		GFP-GPI
in log scale	Mean	SEM	Mean	SEM	Mean	SEM		Mean and SEM of n > 10 cells in each condition
-5	20.43	0.7665	19.09	0.7723	11.17	1.575
-4.9	0.01276	0.0043	0.009798	0.005189	0.01219	0.00457
-4.8	0.0223	0.007497	0.02565	0.01288	0.0112	0.004286
-4.7	0.02857	0.01169	0.01108	0.006749	0.01364	0.005775
-4.6	0.02844	0.00877	0.03317	0.01475	0.0114	0.005582
-4.5	0.0361	0.01293	0.04218	0.01995	0.02895	0.008246
-4.4	0.04654	0.01523	0.01979	0.007619	0.02486	0.01241
-4.3	0.07586	0.02405	0.04513	0.01387	0.04679	0.01315
-4.2	0.07118	0.0166	0.07983	0.02323	0.03688	0.01462
-4.1	0.1036	0.01646	0.04872	0.014	0.07215	0.01852
-4	0.1418	0.0252	0.1398	0.0331	0.06951	0.01313
-3.9	0.1776	0.02808	0.128	0.03815	0.08901	0.02052
-3.8	0.2095	0.0283	0.1539	0.03543	0.1035	0.01791
-3.7	0.233	0.029	0.2093	0.03262	0.1561	0.03058
-3.6	0.271	0.03145	0.2803	0.05417	0.1478	0.02324
-3.5	0.3839	0.03698	0.3065	0.04674	0.2423	0.04998
-3.4	0.4326	0.05219	0.4334	0.05639	0.2825	0.04906
-3.3	0.5879	0.05857	0.5547	0.06896	0.379	0.04714
-3.2	0.6457	0.05045	0.5902	0.07688	0.496	0.06778
-3.1	0.8424	0.06804	0.5788	0.05891	0.58	0.08047
-3	1.007	0.0827	0.9448	0.0666	0.6277	0.08716
-2.9	1.133	0.054	1.181	0.1061	0.7803	0.1022
-2.8	1.331	0.0927	1.267	0.08251	0.8401	0.1034
-2.7	1.695	0.1055	1.337	0.09984	0.9583	0.1049
-2.6	1.66	0.08423	1.469	0.09064	1.111	0.1241
-2.5	1.988	0.09355	1.633	0.09218	1.157	0.1554
-2.4	2.148	0.1142	2.068	0.148	1.33	0.1465
-2.3	2.286	0.09987	2.009	0.1246	1.508	0.1418
-2.2	2.273	0.1197	1.925	0.1249	1.593	0.1488
-2.1	2.267	0.09576	2.191	0.139	1.555	0.1294
-2	2.374	0.08501	2.232	0.1214	1.735	0.125
-1.9	2.321	0.1189	2.266	0.1258	1.904	0.1207
-1.8	2.252	0.1328	2.059	0.1407	1.878	0.1418
-1.7	2.218	0.1227	1.952	0.1567	2.184	0.1009
-1.6	2.263	0.1133	2.11	0.1521	2.164	0.07786
-1.5	2.386	0.1238	2.274	0.1599	2.403	0.1223
-1.4	2.572	0.1196	2.426	0.1641	2.543	0.1267
-1.3	2.808	0.1041	2.754	0.1781	3.055	0.1347
-1.2	2.802	0.1351	2.64	0.1821	3.091	0.1781
-1.1	3.133	0.1262	2.885	0.1507	3.599	0.2135
-1	3.296	0.1416	3.206	0.1435	3.785	0.2028
-0.9	3.457	0.1485	3.381	0.1714	4.256	0.2402
-0.8	3.582	0.1607	3.98	0.1251	4.632	0.2685
-0.7	3.765	0.1794	3.966	0.1942	4.782	0.2712
-0.6	3.402	0.1668	4.034	0.189	5.173	0.3053
-0.5	3.307	0.202	3.877	0.1542	5.486	0.3412
-0.4	3.249	0.1863	3.607	0.187	5.329	0.4029
-0.3	2.704	0.1956	3.653	0.1973	5.031	0.3621
-0.2	2.022	0.1545	2.827	0.2031	4.213	0.327
-0.1	1.559	0.1274	2.198	0.1712	3.138	0.2656
0	1.009	0.09321	1.446	0.1457	2.158	0.2172
0.1	0.5644	0.05937	0.7889	0.08458	1.221	0.1222
0.2	0.2052	0.03692	0.4213	0.0628	0.5158	0.0517
0.3	0.1283	0.02315	0.1504	0.02514	0.195	0.02758
0.4	0.04181	0.01193	0.04504	0.01718	0.08384	0.02093
0.5	0.006966	0.003359	0.01331	0.01181	0.007822	0.003206
0.6	0.001736	0.001736	0.003257	0.003257	0.002394	0.001646
0.7	0	0	0	0	0	0
0.8	0	0	0	0	0	0
0.9	0	0	0	0	0	0
1	0	0	0	0	0	0

## Sheet: Fig.3G
	immobile																																			mobile
8DIV				18.0556	20.0192	17.3168	21.5037	16.1335	17.4691	24.9064	15.2563	21.9392	16.2776		15.1577	32.2216	28.0341	19.8157	27.7003		27.5953	31.2023	25.7143	35.1496	17.1577	19.4757		29.8883	22.9233	26.7021	37.3777	38.3693				81.9444	79.9808	62.7656	78.4963	83.8665	82.5309	75.0936	84.7437	78.0608	83.7224		84.8423	67.7784	71.9659
10DIV	40.4124	36.0155	33.6439	54.4771		24.4266	34.9138	24.3902	30.9638	38.706	47.0245	47.8448	36.5217	28.2427	42.8571	35.0216																				59.5876	63.9845	66.3561	45.5229		75.5734	65.0862	75.6098	69.0362	61.294	52.9755	52.1552	63.4783	71.7573
14DIV	37.2144	50.509	51.687	33.7702	46.3197	34.2442		52.8426	51.0826	40.7831	41.596		57.6271	41.4795	48.9467	48.704	42.9372	49.8219	57.5179	52.7851	41.9204		25.4551	37.7666	45.8164	46.8781	49.007	31.0838	49.6013	46.1318						62.7856	49.491	48.313	66.2298	53.6803	65.7558		47.1574	48.9174	59.2169	58.404		42.3729	58.5205
8DIV	28.2076	18.8442	18.4536	16.3462	20.3072		23.7654	14.3345	29.0448	10.6061	19.403	17.4603	13.0435	15.9873	24.792	25.6558	16.5037	29.4915	31.513	27.4854	15.8562	18.0607														71.7924	81.1558	81.5464	83.6538	79.6928		76.2346	85.6655	70.9552	89.3939	80.597	82.5397	86.9565	84.0127
10DIV	44.7297	41.7819	24.5264	37.8921	34.6633	34.9857		29.023	29.5082	37.5783	34.6912	41.7738	26.1331	20.7447																						55.2703	58.2181	75.4736	62.1079	65.3367	65.0143		70.977	70.4918	62.4217	65.3088	58.2262	73.8669	79.2553
14DIV	47.3371	35.09	42.1549	34.5231	46.4896		28.9604	40.9836	39.8085	39.3764	44.0574	35.7827	32.3464	51.6927	45.6458	30.322		46.6844	47.5556	45.3846	38.0134	43.1452	46.3898													52.6629	64.91	57.8451	65.4769	53.5104		71.0396	59.0164	60.1915	60.6236	55.9426	64.2173	67.6536	48.3073
8DIV	22.6357	18.7373	24.0514	18.1204	22.592	17.8814	17.4801	32.6568																												77.3643	81.2627	75.9486	81.8796	77.408	82.1186	82.5199	67.3432
10DIV	15.9153	8.64619	18.9277	24.4377	16.0664	21.075	12.5835	24.1643	22.7877	27.3159	19.1328	23.979	19.8378																							84.0847	91.3538	81.0723	75.5623	83.9336	78.925	87.4165	75.8357	77.2123	72.6841	80.8672	76.021	80.1622
14DIV	14.5417	23.3391	31.6549	21.189	24.4069	20.5952	36.5097	38.4741	41.8819	11.926	34.3698																									85.4583	76.6609	68.3451	78.811	75.5931	79.4048	63.4903	61.5259	58.1181	88.074	65.6302
[truncated: 15 more columns]

## Sheet: Fig.3H
MDGA2 14DIV	MDGA1 14DIV	GFP-GPI 14DIV		MDGA1 10DIV	MDGA2 10DIV	GFP-GPI 10DIV		MDGA1 8DIV	MDGA2 8DIV	GFP-GPI 8DIV
0.0144127	0.0357585	0.133526		0.0317869	0.0202754	0.235733		0.12321	0.0665647	0.125679
0.0462607	0.0107401	0.0955405		0.0371625	0.0241054	0.267693		0.101188	0.246385	0.142922
0.0228631	0.00921227	0.0762617		0.055596	0.119878	0.218874		0.0762302	0.224091	0.088694
0.0392313	0.042311	0.175896		0.00846783	0.0326547	0.163147		0.161192	0.235436	0.124907
0.0168954	0.0149987	0.0903723		0.105946	0.0470436	0.17737		0.197076	0.254534	0.108842
0.0576407	0.0452861	0.133413		0.0719231	0.0481749	0.0766737		0.136895	0.263627	0.154155
0.031045	0.00777155	0.0463118		0.092	0.0939171	0.179283		0.138744	0.143787	0.123557
0.049728	0.0101489	0.039206		0.0959782	0.104815	0.134676		0.121191	0.333178	0.0440593
0.0270351	0.0237941	0.0239684		0.047517	0.0349918	0.189289		0.189554	0.0840036
0.0179625	0.0211002	0.166251		0.0133823	0.0767991	0.0821094		0.285406	0.262871
0.0498516	0.00632392	0.048404		0.014339	0.02995	0.0938313		0.145202	0.263468
0.0448065	0.028053			0.046801	0.140924	0.129914		0.1296	0.171464
0.00950594	0.0120435			0.103299				0.0783415	0.19519
0.0202559	0.012382			0.0248763				0.159357	0.102097
0.0802771	0.0229508			0.0521167				0.0957708	0.0499796
0.022526	0.0114364							0.0875149	0.066741
0.0134795	0.00533331							0.0901163	0.0665235
0.0191662	0.00845907							0.142263	0.0702107
0.0367528	0.0322447							0.126796	0.0421993
0.0337756	0.0385716							0.0484879	0.121317
0.019482	0.0180691							0.101798	0.0305173
	0.0155775							0.107974	0.117114
	0.0119261							0.116831	0.0938169
	0.0116712							0.0440524	0.165023
	0.0154259							0.058333	0.0525358
									0.0936267
Descriptive statistics
	MDGA2 14DIV	MDGA1 14DIV	GFP-GPI 14DIV		MDGA1 10DIV	MDGA2 10DIV	GFP-GPI 10DIV		MDGA1 8DIV	MDGA2 8DIV	GFP-GPI 8DIV
Number of values	21	25	11		15	12	12		25	26	8
Minimum	0.009506	0.005333	0.02397		0.008468	0.02028	0.07667		0.04405	0.03052	0.04406
Maximum	0.08028	0.04529	0.1759		0.1059	0.1409	0.2677		0.2854	0.3332	0.1542
Range	0.07077	0.03995	0.1519		0.09748	0.1206	0.191		0.2414	0.3027	0.1101
Mean	0.03205	0.01886	0.09356		0.05341	0.06446	0.1624		0.1225	0.1468	0.1141
Std. Deviation	0.01776	0.01176	0.05257		0.03346	0.04133	0.06121		0.05198	0.08834	0.03455
Std. Error of Mean	0.003875	0.002352	0.01585		0.008639	0.01193	0.01767		0.0104	0.01733	0.01221
Kruskal Wallis
Number of families	1
Number of comparisons per family	36
Alpha	0.05
Dunn's multiple comparisons test	Mean rank diff,	Significant?	Summary	Adjusted P Value
MDGA2 14DIV vs. MDGA1 14DIV	18.37	No	ns	>0,9999	A-B
MDGA2 14DIV vs. GFP-GPI 14DIV	-49.37	No	ns	0.1125	A-C
MDGA2 14DIV vs. MDGA1 10DIV	-19.72	No	ns	>0,9999	A-E
MDGA2 14DIV vs. MDGA2 10DIV	-28.86	No	ns	>0,9999	A-F
MDGA2 14DIV vs. GFP-GPI 10DIV	-84.02	Yes	****	<0,0001	A-G
MDGA2 14DIV vs. MDGA1 8DIV	-67.67	Yes	****	<0,0001	A-I
MDGA2 14DIV vs. MDGA2 8DIV	-69.65	Yes	****	<0,0001	A-J
MDGA2 14DIV vs. GFP-GPI 8DIV	-65.94	Yes	*	0.0146	A-K
MDGA1 14DIV vs. GFP-GPI 14DIV	-67.74	Yes	**	0.0011	B-C
MDGA1 14DIV vs. MDGA1 10DIV	-38.09	No	ns	0.3372	B-E
MDGA1 14DIV vs. MDGA2 10DIV	-47.23	No	ns	0.0985	B-F
MDGA1 14DIV vs. GFP-GPI 10DIV	-102.4	Yes	****	<0,0001	B-G
MDGA1 14DIV vs. MDGA1 8DIV	-86.04	Yes	****	<0,0001	B-I
MDGA1 14DIV vs. MDGA2 8DIV	-88.02	Yes	****	<0,0001	B-J
MDGA1 14DIV vs. GFP-GPI 8DIV	-84.31	Yes	***	0.0001	B-K
GFP-GPI 14DIV vs. MDGA1 10DIV	29.65	No	ns	>0,9999	C-E
GFP-GPI 14DIV vs. MDGA2 10DIV	20.52	No	ns	>0,9999	C-F
GFP-GPI 14DIV vs. GFP-GPI 10DIV	-34.65	No	ns	>0,9999	C-G
GFP-GPI 14DIV vs. MDGA1 8DIV	-18.3	No	ns	>0,9999	C-I
GFP-GPI 14DIV vs. MDGA2 8DIV	-20.28	No	ns	>0,9999	C-J
GFP-GPI 14DIV vs. GFP-GPI 8DIV	-16.57	No	ns	>0,9999	C-K
MDGA1 10DIV vs. MDGA2 10DIV	-9.133	No	ns	>0,9999	E-F
MDGA1 10DIV vs. GFP-GPI 10DIV	-64.3	Yes	**	0.0078	E-G
MDGA1 10DIV vs. MDGA1 8DIV	-47.95	Yes	*	0.0387	E-I
MDGA1 10DIV vs. MDGA2 8DIV	-49.93	Yes	*	0.0217	E-J
MDGA1 10DIV vs. GFP-GPI 8DIV	-46.22	No	ns	0.6727	E-K
MDGA2 10DIV vs. GFP-GPI 10DIV	-55.17	No	ns	0.0939	F-G
MDGA2 10DIV vs. MDGA1 8DIV	-38.81	No	ns	0.4973	F-I
MDGA2 10DIV vs. MDGA2 8DIV	-40.79	No	ns	0.3316	F-J
MDGA2 10DIV vs. GFP-GPI 8DIV	-37.08	No	ns	>0,9999	F-K
GFP-GPI 10DIV vs. MDGA1 8DIV	16.35	No	ns	>0,9999	G-I
GFP-GPI 10DIV vs. MDGA2 8DIV	14.37	No	ns	>0,9999	G-J
GFP-GPI 10DIV vs. GFP-GPI 8DIV	18.08	No	ns	>0,9999	G-K
MDGA1 8DIV vs. MDGA2 8DIV	-1.982	No	ns	>0,9999	I-J
MDGA1 8DIV vs. GFP-GPI 8DIV	1.73	No	ns	>0,9999	I-K
MDGA2 8DIV vs. GFP-GPI 8DIV	3.712	No	ns	>0,9999	J-K
Test details	Mean rank 1	Mean rank 2	Mean rank diff,	n1	n2	Z
MDGA2 14DIV vs. MDGA1 14DIV	40.81	22.44	18.37	21	25	1.382
MDGA2 14DIV vs. GFP-GPI 14DIV	40.81	90.18	-49.37	21	11	2.955
MDGA2 14DIV vs. MDGA1 10DIV	40.81	60.53	-19.72	21	15	1.3
MDGA2 14DIV vs. MDGA2 10DIV	40.81	69.67	-28.86	21	12	1.776
MDGA2 14DIV vs. GFP-GPI 10DIV	40.81	124.8	-84.02	21	12	5.173
MDGA2 14DIV vs. MDGA1 8DIV	40.81	108.5	-67.67	21	25	5.093
MDGA2 14DIV vs. MDGA2 8DIV	40.81	110.5	-69.65	21	26	5.289
MDGA2 14DIV vs. GFP-GPI 8DIV	40.81	106.8	-65.94	21	8	3.536
MDGA1 14DIV vs. GFP-GPI 14DIV	22.44	90.18	-67.74	25	11	4.171
MDGA1 14DIV vs. MDGA1 10DIV	22.44	60.53	-38.09	25	15	2.598
MDGA1 14DIV vs. MDGA2 10DIV	22.44	69.67	-47.23	25	12	2.996
MDGA1 14DIV vs. GFP-GPI 10DIV	22.44	124.8	-102.4	25	12	6.495
MDGA1 14DIV vs. MDGA1 8DIV	22.44	108.5	-86.04	25	25	6.777
MDGA1 14DIV vs. MDGA2 8DIV	22.44	110.5	-88.02	25	26	7
MDGA1 14DIV vs. GFP-GPI 8DIV	22.44	106.8	-84.31	25	8	4.624
GFP-GPI 14DIV vs. MDGA1 10DIV	90.18	60.53	29.65	11	15	1.664
GFP-GPI 14DIV vs. MDGA2 10DIV	90.18	69.67	20.52	11	12	1.095
GFP-GPI 14DIV vs. GFP-GPI 10DIV	90.18	124.8	-34.65	11	12	1.849
GFP-GPI 14DIV vs. MDGA1 8DIV	90.18	108.5	-18.3	11	25	1.127
GFP-GPI 14DIV vs. MDGA2 8DIV	90.18	110.5	-20.28	11	26	1.256
GFP-GPI 14DIV vs. GFP-GPI 8DIV	90.18	106.8	-16.57	11	8	0.7943
MDGA1 10DIV vs. MDGA2 10DIV	60.53	69.67	-9.133	15	12	0.5253
MDGA1 10DIV vs. GFP-GPI 10DIV	60.53	124.8	-64.3	15	12	3.699
MDGA1 10DIV vs. MDGA1 8DIV	60.53	108.5	-47.95	15	25	3.27
MDGA1 10DIV vs. MDGA2 8DIV	60.53	110.5	-49.93	15	26	3.43
MDGA1 10DIV vs. GFP-GPI 8DIV	60.53	106.8	-46.22	15	8	2.352
MDGA2 10DIV vs. GFP-GPI 10DIV	69.67	124.8	-55.17	12	12	3.01
MDGA2 10DIV vs. MDGA1 8DIV	69.67	108.5	-38.81	12	25	2.462
MDGA2 10DIV vs. MDGA2 8DIV	69.67	110.5	-40.79	12	26	2.604
MDGA2 10DIV vs. GFP-GPI 8DIV	69.67	106.8	-37.08	12	8	1.81
GFP-GPI 10DIV vs. MDGA1 8DIV	124.8	108.5	16.35	12	25	1.037
GFP-GPI 10DIV vs. MDGA2 8DIV	124.8	110.5	14.37	12	26	0.9174
GFP-GPI 10DIV vs. GFP-GPI 8DIV	124.8	106.8	18.08	12	8	0.8826
MDGA1 8DIV vs. MDGA2 8DIV	108.5	110.5	-1.982	25	26	0.1576
MDGA1 8DIV vs. GFP-GPI 8DIV	108.5	106.8	1.73	25	8	0.09488
MDGA2 8DIV vs. GFP-GPI 8DIV	110.5	106.8	3.712	26	8	0.2045
