# Supplementary material for: MDGAs are fast-diffusing molecules that delay excitatory synapse development by altering neuroligin behavior
Source: eLife. 2022 May 9;11:e75233. doi: 10.7554/eLife.75233 (PMC9084894; doi:10.7554/eLife.75233)
Supplement: Figure 4—source data 1. — Each graph (B,D) is shown in a separate sheet within the file. [file elife-75233-fig4-data1.xlsx]

## Sheet: Fig.4B
AP-MDGA1	AP-MDGA2	GFP-GPI
21.672	14.6937	36.4385		each value corresponds to a different cell
26.1006	17.0654	62.675		three different cell cultures
21.5256	29.1829	23.2572
17.0007	11.349	30.4896
33.9948	29.1206	51.3316
15.2834	42.7209	44.3856
8.30814	27.7115	61.5635
30.0804	13.6606	39.3336
17.7893	21.8277	31.9655
22.5144		41.1604
15.9452		30.0893
		29.3976
		19.1842
Descriptive Statistics
	AP-MDGA1	AP-MDGA2	GFP-GPI
Number of values	11	9	13
Minimum	8.308	11.35	19.18
Maximum	33.99	42.72	62.68
Range	25.69	31.37	43.49
Mean	20.93	23.04	38.56
Std. Deviation	7.252	10.1	13.52
Std. Error of Mean	2.187	3.365	3.75
Kruskal Wallis
Number of families	1
Number of comparisons per family	3
Alpha	0.05
Tukey's multiple comparisons test	Mean Diff,	95,00% CI of diff,	Significant?	Summary	Adjusted P Value
AP-MDGA1 vs. AP-MDGA2	-2.108	-14,14 to 9,919	No	ns	0.9025	A-B
AP-MDGA1 vs. GFP-GPI	-17.63	-28,59 to -6,668	Yes	**	0.0012	A-C
AP-MDGA2 vs. GFP-GPI	-15.52	-27,13 to -3,919	Yes	**	0.0069	B-C
Test details	Mean 1	Mean 2	Mean Diff,	SE of diff,	n1	n2	q	DF
AP-MDGA1 vs. AP-MDGA2	20.93	23.04	-2.108	4.879	11	9	0.6111	30
AP-MDGA1 vs. GFP-GPI	20.93	38.56	-17.63	4.447	11	13	5.607	30
AP-MDGA2 vs. GFP-GPI	23.04	38.56	-15.52	4.707	9	13	4.664	30

## Sheet: Fig.4D
AP-MDGA1	AP-MDGA2	GFP-GPI
23.9869	16.7054	46.8412		each value corresponds to a different cell
22.7604	22.6699	40.7484		three different cell cultures
19.1294	36.507	24.5655
37.4485	34.0998	40.9593
25.2055	10.3331	44.895
37.716		28.163
		45.9297
		38.2655
		42.6095
		30.4855
		30.4237
		27.7068
		70.5882
		36.1288
Descriptive Statistics
	AP-MDGA1	AP-MDGA2	GFP-GPI
Number of values	6	5	14
Minimum	19.13	10.33	24.57
Maximum	37.72	36.51	70.59
Range	18.59	26.17	46.02
Mean	27.71	24.06	39.16
Std. Deviation	7.915	11.18	11.67
Std. Error of Mean	3.231	5.001	3.118
Kruskal Wallis
Number of families	1
Number of comparisons per family	3
Alpha	0.05
Dunn's multiple comparisons test	Mean rank diff,	Significant?	Summary	Adjusted P Value
AP-MDGA1 vs. AP-MDGA2	2.167	No	ns	>0,9999	A-B
AP-MDGA1 vs. GFP-GPI	-7.619	No	ns	0.1016	A-C
AP-MDGA2 vs. GFP-GPI	-9.786	Yes	*	0.0321	B-C
Test details	Mean rank 1	Mean rank 2	Mean rank diff,	n1	n2	Z
AP-MDGA1 vs. AP-MDGA2	9.167	7	2.167	6	5	0.4862
AP-MDGA1 vs. GFP-GPI	9.167	16.79	-7.619	6	14	2.122
AP-MDGA2 vs. GFP-GPI	7	16.79	-9.786	5	14	2.552
