# Supplementary material for: MDGAs are fast-diffusing molecules that delay excitatory synapse development by altering neuroligin behavior
Source: eLife. 2022 May 9;11:e75233. doi: 10.7554/eLife.75233 (PMC9084894; doi:10.7554/eLife.75233)
Supplement: Figure 5—figure supplement 1—source data 1. — Each graph (D,E) is shown in a separate sheet within the file. [file elife-75233-fig5-figsupp1-data1.xlsx]

## Sheet: Fig.5-S1D
	8 DIV				10 DIV				14 DIV
shCTRL	shMDGA1	shMDGA2		shCTRL	shMDGA1	shMDGA2		shCTRL	shMDGA1	shMDGA2
1.13748e-05	0	0.000174231		0.424264	0.355957			0.558813	1.0288	0.456279
0	0	9.63345e-05		0.46926	0.252612	0.722474		0.753248	1.16525	0.599112
0	0	5.61621e-05		0.0975479	0.378498	0.897078		1.01537	0.896761	0.787237
0	0	7.64795e-05		0.305096	0.439116	0.299405		1.41471	1.00779	0.555169
9.6827e-05	0.000112878	4.47359e-05		0.300882	0.370579	1.10634		0.809633	0.954353	0.70887
0	5.10032e-05	4.90913e-05		0.442522	0.168612	1.80854		0.558481	0.918148	0.668999
0	5.95356e-05	0.000168064		0.216141	0.217492	1.57606		1.15167	0.841018	0.609307
1.46926e-05	0	6.47618e-05		0.387958	0.372453	0.725157		1.39543	0.863438
2.10552e-05	0	0.000509799		0.335469	0.290142	1.09072		0.483098	0.648333	1.17349
0	0	3.2926e-05		0.574665	0.748999	1.17417		1.30312	0.518204	1.06072
1.11582e-05	3.42472e-05	4.96635e-05		0.446043	0.335037	1.519		0.857692	0.853113	0.656558
0	0	0.000267738		0.174983	0.136414	1.93409		0.262407	0.926853	0.80565
0	0	0.000397399		0.278439		1.03876		0.866459	0.704451	0.681796
1.83091e-05	0	0.000161315		0.262012		1.15109		0.653768	0.739902	0.913544
0	0	0.000181119		0.0601916		1.40579		0.676114	1.12892	1.30418
0	3.756e-05	6.48555e-05		0.342505		0.192207		0.643223	1.0527	1.31522
0	9.31918e-05	0.000130838		0.188487		1.03596		0.537645	0.695565	1.06965
0	6.91702e-05			0.368273		0.630442		0.538491	1.02818	0.906734
1.22061e-05	2.29608e-05	4.34883e-05		0.201186		0.211239		0.812891	0.878861	0.802529
8.95352e-05	0	7.97566e-05		0.164659		0.328352		0.531359	0.54733	1.33432
0	0.000137394	0.00020583		0.0684352		0.372966		0.603496	0.829381	0.675386
0	6.2428e-05	5.15873e-05		0.347067		0.640322		0.522797	0.934276	0.761249
0	6.40685e-05	5.6301e-05		0.0372867		0.665111		0.934185	0.808231	0.884516
3.44043e-05	0	3.58896e-05		0.05593		0.396276		0.96682	1.03471	0.610765
3.34334e-05	0	9.53227e-05		0.149551		0.439555		0.866231	0.487415	0.687613
4.67401e-05	0	9.13067e-05		0.0578129		0.356994		0.737258	1.02588	1.3094
1.99951e-05	0	9.9619e-05		0.171361		0.268621		0.773408	0.640775	1.09894
0	0	6.9085e-05		0.186645		0.26073		0.892929	0.930426	0.756905
7.93424e-05	5.93683e-05	8.58984e-05		0.119581		0.220654		0.703932	0.594851	0.792157
0	0	0.00013071		0.562222		0.266932		0.570253	0.474931	0.936267
0	0	6.89142e-05		0.363584		0.399052		0.583433	1.71984	0.985189
0	0	0.000131514		0.198807		0.136912		0.324115	0.90087	1.25111
2.54623e-05	0.000283626	6.74184e-05		0.470479		0.339342		0.727854	0.882651	0.708137
4.98781e-05	0	0.0611629		0.28162		0.39482		0.614933	1.18372	0.513089
6.07092e-05	0	0.116503		0.312722		0.0986121		0.57316	1.21098	0.811296
0	0.000107155	0		0.194585		0.163539		0.537387	1.15013	1.51985
0	0	0.17503		0.0149661		1.04028		0.726789	1.55462	0.964332
0	0.000115827	0.0975213		0.0316596		0.409139		0.663382	0.764197	0.495465
2.2296e-05	0.000195086	0.0355169		0.0438293		0.573102		0.551615	0.809322	0.576341
3.87765e-05	0	0.0519715		0.20129		0.478134		0.771206	0.930722	0.793093
0	0	0.355004		0.171062		0.164472		0.688447	1.08025	0.622096
0	0.0139185	0.274506		0.190186		0.342483		0.43616	0.987628	1.04615
1.6338e-05	0	0.107332		0.0497642		0.310315		0.991061	0.927899	0.839871
0	0.0230786	0.14952		0.126612		0.402226		0.310334	0.995667	0.861841
0	0.0151126	0.106978		0.0612191		0.353428		0.489667	0.402387	0.78421
0	0.0115814	0.331329		0.168644		0.460907		0.379531	0.347616	1.10841
0.0210163	0	0.530219		0.468		0.421822		0.734798	0.945139	1.20837
0	0	0.0849493		0.332101		0.131189		0.52842	0.567972	0.590374
0.0321895	0	0.120214		0.192327		0.495461		0.33115	0.260636	0.810226
0.0243339	0	0.0735597		0.199683		0.304484		0.487183	0.827359	0.729098
0	0	0.0485516		0.140025		0.225178
0.0273601	0	0.0767253		0.214236		0.329086
0	0.0503735	0.0381234		0.360163
0.103556	0	0.0509196		0.324938
0.0219825	0	0.0836115		0.203473
0.0197711	0	0.0994467		0.443952
0	0	0.372316
0	0.0245062	0.503022
0.012653	0.0608525	0.254814
0	0	0.393091
0	0	0.272407
0	0	0.623657
0.0140351	0	0.188578
0.0173862	0.0446064	0.158353
0.013182	0.0257881	0.192099
0		0.586559
0	0	0.252429
0	0	0.143047
0.0187745	0	0.345924
	0	0.203496
0	0.0261448	0.373191
0	0.211986	0.215916
0	0.492611	0.255373
0	0.331509	0.19468
0	0.219868	0.24187
0	0.245921	0.327293
0	0.204391	0.250905
0	0.151574	0.283329
0	0.116482	0.168197
0	0.123534	0.204064
0	0.0712038	0.189948
0	0.203132	0.555763
0	0.258991
0	0.304866
0	0.243601
0	0.213617
0.173445	0.15556
0.0619096	0.276663
0.0618277	0.094395
0.138228	0.315584
0.081003	0.390311
0.284876
0.13271
0.208633
0.119358
0.166924
Descriptive statistics
		8 div				10 div				14 div
	shCTRL	shMDGA1	shMDGA2		shCTRL	shMDGA1	shMDGA2		shCTRL	shMDGA1	shMDGA2
Number of values	95	90	81		56	12	51		50	50	49
Minimum	0	0	0		0.01497	0.1364	0.09861		0.2624	0.2606	0.4563
Maximum	0.2849	0.4926	0.6237		0.5747	0.749	1.934		1.415	1.72	1.52
Range	0.2849	0.4926	0.6237		0.5597	0.6126	1.835		1.152	1.459	1.064
Mean	0.01848	0.0547	0.1336		0.2421	0.3388	0.6021		0.6969	0.8722	0.86
Std. Deviation	0.04957	0.1068	0.1614		0.1444	0.1586	0.4591		0.258	0.2733	0.2548
Std. Error of Mean	0.005086	0.01126	0.01793		0.01929	0.04579	0.06429		0.03649	0.03866	0.0364
Kruskal Wallis test
Number of families	1
Number of comparisons per family	3
Alpha	0.05
Dunn's multiple comparisons test	Mean rank diff,	Significant?	Summary	Adjusted P Value
shCTRL vs. shMDGA1	-24.03	No	ns	0.0876	A-B
shCTRL vs. shMDGA2	-94.54	Yes	****	<0,0001	A-C
shMDGA1 vs. shMDGA2	-70.51	Yes	****	<0,0001	B-C
Test details	Mean rank 1	Mean rank 2	Mean rank diff,	n1	n2	Z
shCTRL vs. shMDGA1	96.58	120.6	-24.03	95	90	2.181
shCTRL vs. shMDGA2	96.58	191.1	-94.54	95	81	8.344
shMDGA1 vs. shMDGA2	120.6	191.1	-70.51	90	81	6.145
Number of families	1
Number of comparisons per family	3
Alpha	0.05
Dunn's multiple comparisons test	Mean rank diff,	Significant?	Summary	Adjusted P Value
shCTRL vs. shMDGA1	-17.57	No	ns	0.3283	E-F
shCTRL vs. shMDGA2	-34.33	Yes	****	<0,0001	E-G
shMDGA1 vs. shMDGA2	-16.76	No	ns	0.3899	F-G
Test details	Mean rank 1	Mean rank 2	Mean rank diff,	n1	n2	Z
shCTRL vs. shMDGA1	43.52	61.08	-17.57	56	12	1.601
shCTRL vs. shMDGA2	43.52	77.84	-34.33	56	51	5.141
shMDGA1 vs. shMDGA2	61.08	77.84	-16.76	12	51	1.514
Number of families	1
Number of comparisons per family	3
Alpha	0.05
Dunn's multiple comparisons test	Mean rank diff,	Significant?	Summary	Adjusted P Value
shCTRL vs. shMDGA1	-32.04	Yes	***	0.0006	I-J
shCTRL vs. shMDGA2	-27.21	Yes	**	0.0051	I-K
shMDGA1 vs. shMDGA2	4.83	No	ns	>0,9999	J-K
Test details	Mean rank 1	Mean rank 2	Mean rank diff,	n1	n2	Z
shCTRL vs. shMDGA1	55.3	87.34	-32.04	50	50	3.712
shCTRL vs. shMDGA2	55.3	82.51	-27.21	50	49	3.137
shMDGA1 vs. shMDGA2	87.34	82.51	4.83	50	49	0.5567

## Sheet: Fig.5-S1E
		8 div			10 div			14 div
	shCONTROL	shMDGA1	shMDGA2	shCONTROL	shMDGA1	shMDGA2	shCONTROL	shMDGA1	shMDGA2
	0.173445	0.723529	0.276433	0.102675	0.264466	0.390454
	0.65712	0.349095	0.359362	0.516227	0.332916	0.356602	0.477594	0.495744	0.473885
	0.536192	0.34225	0.477194	0.4107	0.389785	0.356172	0.630881	0.351876	0.457963
	0.482002	0.518264	0.789188	0.481595	0.256688	0.418478	0.374491	0.381823	0.344952
	0.24642	0.321335	0.5476	0.376475	0.222463	0.420336	0.424793	0.316322	0.613515
	0.718725	0.302321	0.597382	0.329321	0.49341	0.307229	0.396607	0.413145	0.488929
	0.504041	0.222463	0.308025	0.31487	1.11017	0.947227	0.567157	0.498964	0.419455
	0.325138	0.333694	0.290913	0.470594	0.47915	0.323546	0.432566	0.445962	0.57535
	0.308025	0.313729	0.309062	0.321715	0.951095	0.341906	0.349856	0.840957	0.598067
	1.40634	0.381038	0.447133	0.265539	0.5365	0.603827	0.385276	0.973273	0.383809
	0.573269	0.898857	0.311447	0.336846	0.686782	0.332667	0.53171	0.463178	0.786632
	0.250983	0.654301	0.44746	0.334916	1.18266	0.362284	0.366588	1.06998	1.41806
	0.40466	0.441503	0.278986	0.468619		0.336416	0.458615	0.441586	0.452596
	0.444925	0.470594	0.454366	0.317359		0.498212	0.55364	0.424622	0.641719
		0.413333	0.302723	0.855625		0.420656	0.504041	0.457004	0.431235
		0.431533	0.491984	0.880071		0.34623	0.513375	0.340313	0.532541
		0.290913	0.508486	0.982746		0.705891	0.530025	0.440509	0.323997
		0.315984	0.389024	0.376475		0.472927	0.278689	0.428917	0.531976
		0.947605	0.364252	0.4107		0.875182	0.470825	0.563762	0.538266
		0.430045	0.458615	0.773485		0.345361	0.678548	0.332597	0.56129
		0.38332	0.453481	0.521273		0.808955	0.639904	0.460063	0.560434
		0.435591	0.299469	0.688778		0.706821	0.354859	0.578616	0.486253
		0.258589	1.13601	0.513375		0.462037	0.309062	0.808471	0.275207
			0.241286	0.524783		0.473446	0.249158	0.284171	0.293437
			0.760909	0.467742		0.269522	0.363866	0.456727	0.492398
			0.668704	0.433517		0.449203	0.362339	0.306088	0.41552
			0.454704	0.415164		0.392687	0.311001	0.348769	0.417158
			0.335405	0.618495		0.654301	0.483775	0.432582	0.526744
			0.320004	0.51864		0.708946	0.748229	0.425111	0.311045
			0.481432	0.435798		0.859903	0.423596	0.328088	0.383186
			1.08151	0.28749		0.32047	0.538159	0.328157	0.425799
			0.716092	0.333694		0.544177	0.442565	0.536192	0.505453
			0.497729	0.677981		0.405566	0.422108	0.242941	0.397718
			0.470594	0.524783		0.40357	0.52022	0.188238	0.382025
			0.235972	0.488484		1.65333	0.387883	0.339081	0.416069
			0.529347	0.664755		1.00322	0.405435	0.374267	0.353495
			0.325138	0.443733		0.352914	0.499685	0.38313	0.364083
			0.354695	0.387657		0.440889	0.535257	0.404996	0.497213
			0.543574	0.418133		0.4896	0.628029	0.45905	0.365067
			0.628495	0.29184		0.244622	0.471987	0.50707	0.332043
			0.311447	0.413257		0.331581	0.490762	0.627662	0.40563
			0.482791	0.31744		0.6984	0.490973	0.338769	0.412567
			0.779352	0.384		0.9088	0.318292	0.476748	0.489023
			0.917658	0.208738		0.507482	0.405887	0.345292	0.323582
			0.473562	0.3584		0.3648	0.535155	0.395577	0.671277
			0.395358	0.2304		0.7632	0.592898	0.552016	0.371777
			0.343842	0.251733		0.451491	0.380278	0.425673	0.375078
			0.415152	0.1664		0.585143	0.366376	0.366696	0.328894
			0.60236	0.3072		0.51584	0.395577	0.527319	0.52944
			0.464482	0.518024		0.32256	0.607494	0.398579	0.495329
				0.27136		0.273067	0.395014	0.345672	0.61233
				0.3072			0.371972	0.563157	0.363903
				0.319015			0.633162	0.351005	0.480671
				0.373029			0.343391	0.46313	0.373971
				0.337318			0.32856	0.336546	0.398308
				0.234667			0.448348	0.374267	0.319433
							0.392447	0.331773	0.499844
							0.461031	0.39481	0.257543
							0.530488	0.47915	0.611772
							0.355642	0.520981	0.56186
							0.226537		0.365827
							0.350598		0.376475
							0.363641		0.440777
							0.474734		0.583313
							0.34107		0.358678
							0.352029		0.48422
							0.236236		0.4107
							0.412839		0.35651
							0.338828		0.675373
							0.389638		0.49284
							0.390165		0.443124
							0.482261		0.327704
							0.422882		0.517042
							0.337497		0.337361
							0.470222		0.212956
							0.52022		0.37403
									0.462037
									0.515942
									0.570417
									0.355084
									0.458408
									0.5476
									0.364396
Descriptive statistics
		shCONTROL	shMDGA1	shMDGA2	shCONTROL	shMDGA1	shMDGA2	shCONTROL	shMDGA1	shMDGA2
Number of values		14	23	50	56	12	51	75	59	82
Minimum		0.1734	0.2225	0.236	0.1027	0.2225	0.2446	0.2265	0.1882	0.213
Maximum		1.406	0.9476	1.136	0.9827	1.183	1.653	0.7482	1.07	1.418
Range		1.233	0.7251	0.9	0.8801	0.9602	1.409	0.5217	0.8817	1.205
Mean		0.5022	0.4426	0.4826	0.4282	0.5755	0.5202	0.4397	0.4489	0.4596				7
Std. Deviation		0.3055	0.1913	0.2007	0.1747	0.336	0.2533	0.1058	0.157	0.1512
Std. Error of Mean		0.08165	0.03989	0.02838	0.02334	0.097	0.03546	0.01221	0.02045	0.0167
Kruskal Wallis test
Number of families	1
Number of comparisons per family	36
Alpha	0.05
Dunn's multiple comparisons test	Mean rank diff,	Significant?	Summary	Adjusted P Value
shCONTROL vs. shMDGA1	36.55	No	ns	>0,9999	B-C
shCONTROL vs. shMDGA2	-1.509	No	ns	>0,9999	B-D
shCONTROL vs. shCONTROL	33.68	No	ns	>0,9999	B-F
shCONTROL vs. shMDGA1	-20.35	No	ns	>0,9999	B-G
shCONTROL vs. shMDGA2	-14.22	No	ns	>0,9999	B-H
shCONTROL vs. shCONTROL	2.731	No	ns	>0,9999	B-I
shCONTROL vs. shMDGA1	10.88	No	ns	>0,9999	B-J
shCONTROL vs. shMDGA2	-7.307	No	ns	>0,9999	B-K
shMDGA1 vs. shMDGA2	-38.06	No	ns	>0,9999	C-D
shMDGA1 vs. shCONTROL	-2.871	No	ns	>0,9999	C-F
shMDGA1 vs. shMDGA1	-56.89	No	ns	>0,9999	C-G
shMDGA1 vs. shMDGA2	-50.77	No	ns	>0,9999	C-H
shMDGA1 vs. shCONTROL	-33.82	No	ns	>0,9999	C-I
shMDGA1 vs. shMDGA1	-25.67	No	ns	>0,9999	C-J
shMDGA1 vs. shMDGA2	-43.86	No	ns	>0,9999	C-K
shMDGA2 vs. shCONTROL	35.19	No	ns	>0,9999	D-F
shMDGA2 vs. shMDGA1	-18.84	No	ns	>0,9999	D-G
shMDGA2 vs. shMDGA2	-12.71	No	ns	>0,9999	D-H
shMDGA2 vs. shCONTROL	4.24	No	ns	>0,9999	D-I
shMDGA2 vs. shMDGA1	12.39	No	ns	>0,9999	D-J
shMDGA2 vs. shMDGA2	-5.798	No	ns	>0,9999	D-K
shCONTROL vs. shMDGA1	-54.02	No	ns	>0,9999	F-G
shCONTROL vs. shMDGA2	-47.9	No	ns	>0,9999	F-H
shCONTROL vs. shCONTROL	-30.95	No	ns	>0,9999	F-I
shCONTROL vs. shMDGA1	-22.8	No	ns	>0,9999	F-J
shCONTROL vs. shMDGA2	-40.99	No	ns	>0,9999	F-K
shMDGA1 vs. shMDGA2	6.123	No	ns	>0,9999	G-H
shMDGA1 vs. shCONTROL	23.08	No	ns	>0,9999	G-I
shMDGA1 vs. shMDGA1	31.22	No	ns	>0,9999	G-J
shMDGA1 vs. shMDGA2	13.04	No	ns	>0,9999	G-K
shMDGA2 vs. shCONTROL	16.95	No	ns	>0,9999	H-I
shMDGA2 vs. shMDGA1	25.1	No	ns	>0,9999	H-J
shMDGA2 vs. shMDGA2	6.916	No	ns	>0,9999	H-K
shCONTROL vs. shMDGA1	8.145	No	ns	>0,9999	I-J
shCONTROL vs. shMDGA2	-10.04	No	ns	>0,9999	I-K
shMDGA1 vs. shMDGA2	-18.18	No	ns	>0,9999	J-K
Test details	Mean rank 1	Mean rank 2	Mean rank diff,	n1	n2	Z
shCONTROL vs. shMDGA1	216.1	179.5	36.55	14	23	0.884
shCONTROL vs. shMDGA2	216.1	217.6	-1.509	14	50	0.04091
shCONTROL vs. shCONTROL	216.1	182.4	33.68	14	56	0.9241
shCONTROL vs. shMDGA1	216.1	236.4	-20.35	14	12	0.424
shCONTROL vs. shMDGA2	216.1	230.3	-14.22	14	51	0.3865
shCONTROL vs. shCONTROL	216.1	213.3	2.731	14	75	0.07692
shCONTROL vs. shMDGA1	216.1	205.2	10.88	14	59	0.3
shCONTROL vs. shMDGA2	216.1	223.4	-7.307	14	82	0.2072
shMDGA1 vs. shMDGA2	179.5	217.6	-38.06	23	50	1.239
shMDGA1 vs. shCONTROL	179.5	182.4	-2.871	23	56	0.09505
shMDGA1 vs. shMDGA1	179.5	236.4	-56.89	23	12	1.31
shMDGA1 vs. shMDGA2	179.5	230.3	-50.77	23	51	1.657
shMDGA1 vs. shCONTROL	179.5	213.3	-33.82	23	75	1.163
shMDGA1 vs. shMDGA1	179.5	205.2	-25.67	23	59	0.8563
shMDGA1 vs. shMDGA2	179.5	223.4	-43.86	23	82	1.524
shMDGA2 vs. shCONTROL	217.6	182.4	35.19	50	56	1.483
shMDGA2 vs. shMDGA1	217.6	236.4	-18.84	50	12	0.4805
shMDGA2 vs. shMDGA2	217.6	230.3	-12.71	50	51	0.5238
shMDGA2 vs. shCONTROL	217.6	213.3	4.24	50	75	0.1904
shMDGA2 vs. shMDGA1	217.6	205.2	12.39	50	59	0.5283
shMDGA2 vs. shMDGA2	217.6	223.4	-5.798	50	82	0.2649
shCONTROL vs. shMDGA1	182.4	236.4	-54.02	56	12	1.392
shCONTROL vs. shMDGA2	182.4	230.3	-47.9	56	51	2.029
shCONTROL vs. shCONTROL	182.4	213.3	-30.95	56	75	1.437
shCONTROL vs. shMDGA1	182.4	205.2	-22.8	56	59	1.002
shCONTROL vs. shMDGA2	182.4	223.4	-40.99	56	82	1.938
shMDGA1 vs. shMDGA2	236.4	230.3	6.123	12	51	0.1565
shMDGA1 vs. shCONTROL	236.4	213.3	23.08	12	75	0.6086
shMDGA1 vs. shMDGA1	236.4	205.2	31.22	12	59	0.8084
shMDGA1 vs. shMDGA2	236.4	223.4	13.04	12	82	0.3459
shMDGA2 vs. shCONTROL	230.3	213.3	16.95	51	75	0.7659
shMDGA2 vs. shMDGA1	230.3	205.2	25.1	51	59	1.076
shMDGA2 vs. shMDGA2	230.3	223.4	6.916	51	82	0.318
shCONTROL vs. shMDGA1	213.3	205.2	8.145	75	59	0.3838
shCONTROL vs. shMDGA2	213.3	223.4	-10.04	75	82	0.5151
shMDGA1 vs. shMDGA2	205.2	223.4	-18.18	59	82	0.8733
