# Supplementary material for: MDGAs are fast-diffusing molecules that delay excitatory synapse development by altering neuroligin behavior
Source: eLife. 2022 May 9;11:e75233. doi: 10.7554/eLife.75233 (PMC9084894; doi:10.7554/eLife.75233)
Supplement: Figure 5—source data 1. — Each graph (B,C,E,F) is shown in a separate sheet within the file. [file elife-75233-fig5-data1.xlsx]

## Sheet: Fig.5B
Diffusion coefficient (µm²/s)	shCONTROL		shMDGA2		shMDGA2 + res MDGA2
in log scale	mean	sem	mean	sem	mean	sem
-5	19.52	0.7897	17.24	0.751	18.46	1.373		Mean and SEM of n > 10 cells in each condition
-4.9	0.006116	0.00442	0.005172	0.00291	0.02279	0.0108
-4.8	0.009747	0.006907	0.009158	0.004528	0.0072	0.0072
-4.7	0.008861	0.004966	0.007708	0.005572	0.02411	0.01179
-4.6	0.02929	0.01115	0.02019	0.008193	0.01807	0.008498
-4.5	0.03255	0.01334	0.00934	0.005351	0.01994	0.01436
-4.4	0.0641	0.015	0.03265	0.0113	0.04995	0.02375
-4.3	0.06306	0.01867	0.06754	0.02506	0.04875	0.01625
-4.2	0.06912	0.01621	0.06961	0.01774	0.05899	0.02304
-4.1	0.07828	0.01881	0.09412	0.02145	0.07267	0.0209
-4	0.1029	0.02435	0.1229	0.02536	0.0877	0.02073
-3.9	0.1475	0.04892	0.1076	0.02232	0.164	0.04116
-3.8	0.159	0.03108	0.1337	0.02573	0.1953	0.04543
-3.7	0.2468	0.04032	0.1769	0.02262	0.3075	0.03336
-3.6	0.2135	0.02914	0.2111	0.04516	0.3047	0.06053
-3.5	0.3813	0.06236	0.2678	0.03846	0.2974	0.04158
-3.4	0.4758	0.05685	0.3922	0.05084	0.5119	0.08597
-3.3	0.5259	0.08125	0.4245	0.05752	0.6111	0.08879
-3.2	0.7581	0.07321	0.6108	0.06447	0.6825	0.1197
-3.1	0.8034	0.0851	0.7215	0.06417	0.8136	0.1349
-3	1.054	0.1105	0.8429	0.0749	1.036	0.1205
-2.9	1.143	0.07606	0.9294	0.09705	1.187	0.1333
-2.8	1.338	0.1006	1.184	0.1159	1.408	0.1526
-2.7	1.554	0.1125	1.403	0.1263	1.607	0.1638
-2.6	1.745	0.1174	1.745	0.1259	1.776	0.171
-2.5	2.029	0.1392	1.687	0.125	2.099	0.1728
-2.4	2.517	0.1483	1.924	0.1393	2.096	0.1536
-2.3	2.325	0.1659	2.132	0.1578	2.021	0.1372
-2.2	2.399	0.1421	2.103	0.145	2.477	0.1842
-2.1	2.521	0.2077	2.368	0.1563	2.048	0.1188
-2	2.311	0.1623	2.691	0.1772	2.165	0.1717
-1.9	2.394	0.1349	2.554	0.1677	2.147	0.1604
-1.8	2.461	0.1704	2.74	0.2601	2.323	0.1572
-1.7	2.55	0.1997	2.692	0.2203	2.016	0.1615
-1.6	2.627	0.2102	2.909	0.2055	2.097	0.134
-1.5	2.812	0.2271	3.149	0.3206	2.23	0.1966
-1.4	2.815	0.23	3.077	0.2272	2.457	0.1761
-1.3	2.893	0.21	3.656	0.2198	2.596	0.2126
-1.2	3.221	0.2211	3.478	0.2058	3.11	0.2357
-1.1	3.42	0.1974	3.839	0.1681	3.509	0.2279
-1	3.727	0.1532	3.796	0.1789	3.52	0.278
-0.9	3.762	0.2017	3.956	0.1849	4.011	0.2464
-0.8	3.962	0.207	4.012	0.2107	4.376	0.2665
-0.7	4.147	0.3051	4.22	0.1961	4.404	0.2838
-0.6	4.027	0.2813	3.855	0.2668	4.6	0.2903
-0.5	3.216	0.3426	3.554	0.377	3.939	0.3383
-0.4	2.684	0.2832	2.974	0.2783	3.689	0.3315
-0.3	2.019	0.2393	2.201	0.2563	2.844	0.2689
-0.2	1.36	0.173	1.719	0.3011	1.761	0.2067
-0.1	0.6624	0.1283	0.9323	0.1166	0.9726	0.1289
0	0.3491	0.07253	0.5717	0.1203	0.4962	0.05996
0.1	0.1707	0.04693	0.2317	0.04834	0.1475	0.03674
0.2	0.05052	0.01681	0.1172	0.04307	0.05779	0.02191
0.3	0.03839	0.01963	0.02622	0.009198	0.02289	0.01263
0.4	0	0	0.001314	0.001314	0	0
0.5	0.001794	0.001794	0.003858	0.002673	0	0
0.6	0	0	0	0	0	0
0.7	0	0	0	0	0	0
0.8	0	0	0	0	0	0
0.9	0	0	0	0	0	0
1	0	0	0	0	0	0

## Sheet: Fig.5C
shCONTROL	shMDGA2	shMDGA2+res
0.0443543	0.0251993	0.00510259		each value corresponds to a different cell
0.0311133	0.0145599	0.0297108		three different cell cultures
0.00393297	0.0276971	0.0666582
0.0216581	0.0949058	0.0199189
0.0372844	0.0185498	0.0233896
0.0078714	0.0717042	0.0523905
0.0700338	0.0177664	0.0197859
0.0128261	0.0117778	0.0169366
0.0122295	0.0271746	0.0944572
0.0167181	0.0102364	0.0964886
0.0324606	0.0301886	0.0466012
0.0321925	0.0126372	0.0146118
0.0166455	0.0483818	0.0208769
0.0142838	0.0452221	0.00630761
0.0195272	0.0323656	0.00343077
0.0235064	0.0338689	0.0164236
0.0127373	0.0946161
0.0147815	0.0161216
0.0100435	0.0494184
0.0183629	0.0342637
0.0217037	0.0277806
	0.0129448
	0.0286545
	0.0150854
	0.0309746
	0.0134656
Descriptive statistic
	shCONTROL	shMDGA2	shMDGA2+res
Number of values	21	26	16
Minimum	0.003933	0.01024	0.003431
Maximum	0.07003	0.09491	0.09649
Range	0.0661	0.08467	0.09306
Mean	0.02258	0.03252	0.03332
Std. Deviation	0.01492	0.02325	0.02981
Std. Error of Mean	0.003257	0.00456	0.007453
Kruskal Wallis test
Number of families	1
Number of comparisons per family	3
Alpha	0.05
Dunn's multiple comparisons test	Mean rank diff,	Significant?	Summary	Adjusted P Value
shCONTROL vs. shMDGA2	-8.147	No	ns	0.3895	A-C
shCONTROL vs. shMDGA2+res	-5.512	No	ns	>0,9999	A-D
shMDGA2 vs. shMDGA2+res	2.635	No	ns	>0,9999	C-D
Test details	Mean rank 1	Mean rank 2	Mean rank diff,	n1	n2	Z
shCONTROL vs. shMDGA2	27.24	35.38	-8.147	21	26	1.515
shCONTROL vs. shMDGA2+res	27.24	32.75	-5.512	21	16	0.9062
shMDGA2 vs. shMDGA2+res	35.38	32.75	2.635	26	16	0.4523

## Sheet: Fig.5E
Diffusion coefficient (µm²/s)	shCONTROL		shMDGA2		shMDGA2+res.
in log scale	mean	sem	mean	sem	mean	sem
-5	23.32	0.6649	25.74	1.37	21.51	1.294		Mean and SEM of n > 10 cells in each condition
-4.9	0.005094	0.003579	0.003546	0.003546	0.05191	0.02188
-4.8	0.01419	0.004809	0.01052	0.005047	0.00969	0.00969
-4.7	0.01594	0.006551	0.006467	0.004721	0.00969	0.00969
-4.6	0.02864	0.006925	0.01155	0.005877	0.03006	0.01544
-4.5	0.04154	0.008918	0.02279	0.01037	0.0209	0.01502
-4.4	0.03593	0.008134	0.01884	0.008925	0.01905	0.01905
-4.3	0.03186	0.01166	0.05179	0.01775	0.01162	0.01162
-4.2	0.04329	0.009396	0.04176	0.01455	0.08525	0.04337
-4.1	0.04297	0.0108	0.07503	0.02722	0.07277	0.02454
-4	0.07548	0.01227	0.081	0.02213	0.1465	0.03338
-3.9	0.1233	0.01578	0.1616	0.02606	0.135	0.0381
-3.8	0.1504	0.01838	0.1724	0.0239	0.1648	0.0592
-3.7	0.1935	0.01982	0.1813	0.02696	0.1903	0.04417
-3.6	0.1797	0.02316	0.204	0.02268	0.5284	0.1092
-3.5	0.3214	0.04271	0.3745	0.06086	0.4478	0.09448
-3.4	0.3523	0.03158	0.3634	0.04665	0.5319	0.08086
-3.3	0.4725	0.04398	0.4111	0.0373	0.8208	0.1612
-3.2	0.5397	0.04808	0.6077	0.06413	0.8637	0.1403
-3.1	0.6876	0.05042	0.7633	0.09781	0.7944	0.1227
-3	0.8093	0.07236	0.987	0.08688	1.159	0.135
-2.9	0.9558	0.06514	1.281	0.1097	1.424	0.09787
-2.8	1.252	0.07912	1.414	0.1254	1.547	0.1733
-2.7	1.448	0.08299	1.791	0.1507	1.99	0.2629
-2.6	1.656	0.09089	1.986	0.1556	2.117	0.3006
-2.5	1.946	0.09547	2.361	0.1795	2.545	0.2721
-2.4	2.158	0.1083	2.445	0.1309	2.47	0.2305
-2.3	2.269	0.1235	2.821	0.165	2.421	0.2551
-2.2	2.461	0.1141	3.167	0.19	2.268	0.2344
-2.1	2.646	0.09804	3.149	0.1789	2.709	0.3029
-2	2.869	0.1104	3.199	0.1361	2.251	0.201
-1.9	2.765	0.1066	3.221	0.1769	2.505	0.07687
-1.8	2.931	0.09838	3.144	0.1833	2.18	0.1489
-1.7	2.879	0.1104	3.323	0.2209	2.445	0.1783
-1.6	2.982	0.117	3.265	0.2328	2.197	0.1697
-1.5	3.024	0.1207	3.377	0.2688	2.643	0.1965
-1.4	3.193	0.1065	3.265	0.2379	2.714	0.2677
-1.3	3.198	0.1447	3.006	0.1979	2.893	0.2278
-1.2	3.436	0.1566	2.853	0.2617	3.205	0.3415
-1.1	3.602	0.1659	3.05	0.229	3.256	0.261
-1	3.64	0.1616	3.083	0.2012	3.871	0.3254
-0.9	3.564	0.1697	2.879	0.1896	3.58	0.2864
-0.8	3.637	0.2051	2.56	0.1852	3.42	0.2845
-0.7	3.326	0.1942	2.209	0.2208	3.2	0.3123
-0.6	3.03	0.1733	2.062	0.2174	3.604	0.2765
-0.5	2.504	0.1758	1.541	0.1694	2.914	0.3545
-0.4	1.839	0.1507	1.302	0.153	2.207	0.2519
-0.3	1.332	0.1357	0.7777	0.09876	1.627	0.1648
-0.2	0.9245	0.1072	0.6194	0.07967	1.086	0.1731
-0.1	0.5019	0.07208	0.3036	0.05402	0.588	0.1175
0	0.2549	0.04016	0.1215	0.0263	0.3091	0.0705
0.1	0.1513	0.0255	0.07518	0.02281	0.1485	0.03628
0.2	0.05856	0.01475	0.02673	0.01111	0.04271	0.0174
0.3	0.01727	0.006014	0.01056	0.005921	0.01455	0.01455
0.4	0.007991	0.006133	0	0	0	0
0.5	0	0	0	0	0	0
0.6	0	0	0	0	0	0
0.7	0	0	0	0	0	0
0.8	0	0	0	0	0	0
0.9	0	0	0	0	0	0
1	0	0	0	0	0	0

## Sheet: Fig.5F
shCONTROL	shMDGA2	shMDGA2 + resMDGA2
0.00651	0.0148	0.00983359		each value corresponds to a different cell
0.0144	0.0247	0.0114781		three different cell cultures
0.00577	0.0047	0.00363188
0.021	0.0123	0.0258718
0.0108	0.019	0.0098433
0.0217	0.00656	0.0130438
0.0389	0.00523	0.0374245
0.0257	0.0154	0.00752652
0.00842	0.00716
0.0229	0.00907
0.0371	0.00751
0.0429	0.00371
0.0219	0.00673
0.00462	0.00567
0.00892
0.00937
0.0141
0.00169
0.0116
0.0691
0.0332
0.0144
0.0288
0.00703
0.0177
0.00958
0.0127
0.011
0.00333
0.0177
0.0184
0.0235
0.0173
0.113
0.0125
Descriptive Statistics
	shCONTROL	shMDGA2	shMDGA2+res
Number of values	35	15	8
Minimum	0.00169	0.00371	0.003632
Maximum	0.113	0.0247	0.03742
Range	0.1113	0.02099	0.03379
Mean	0.02107	0.009793	0.01483
Std. Deviation	0.0209	0.006168	0.01118
Std. Error of Mean	0.003533	0.001593	0.003954
Kruskal Wallis
Number of families	1
Number of comparisons per family	3
Alpha	0.05
Dunn's multiple comparisons test	Mean rank diff,	Significant?	Summary	Adjusted P Value
shCONTROL vs. shMDGA2	13.65	Yes	*	0.0265	A-C
shCONTROL vs. shMDGA2+res	4.964	No	ns	>0,9999	A-D
shMDGA2 vs. shMDGA2+res	-8.683	No	ns	0.7205	C-D
Test details	Mean rank 1	Mean rank 2	Mean rank diff,	n1	n2	Z
shCONTROL vs. shMDGA2	33.71	20.07	13.65	35	15	2.619
shCONTROL vs. shMDGA2+res	33.71	28.75	4.964	35	8	0.7502
shMDGA2 vs. shMDGA2+res	20.07	28.75	-8.683	15	8	1.175
