# Supplementary material for: MDGAs are fast-diffusing molecules that delay excitatory synapse development by altering neuroligin behavior
Source: eLife. 2022 May 9;11:e75233. doi: 10.7554/eLife.75233 (PMC9084894; doi:10.7554/eLife.75233)
Supplement: Figure 6—figure supplement 1—source data 1. — Each graph (B,D) is shown in a separate sheet within the file. [file elife-75233-fig6-figsupp1-data1.xlsx]

## Sheet: Fig.6-S1B
shCTRL	shMDGA2
2.72363	1.29284
1.91701	1.94039
2.10037	1.25029
1.66019	2.9431
1.95467	2.3685
1.89606	2.64295
1.50683	2.51913
1.44102	1.43232
1.25724	1.94418
1.30599	2.83746
1.10819	2.28148
2.27016	1.72765
2.03838	3.74329
1.05674	1.81476
1.91788	1.66317
1.53943	1.32771
2.59466	1.15917
1.90389	1.19196
Descriptive Statistics
	shCTRL	shMDGA2
Number of values	18	18
Minimum	1.057	1.159
Maximum	2.724	3.743
Range	1.667	2.584
Mean	1.788	2.004
Std. Deviation	0.4724	0.7257
Std. Error of Mean	0.1113	0.171
Normality Test
	shCTRL	shMDGA2
Test for normal distribution
Anderson-Darling test
A2*	0.2719	0.4274
P value	0.628	0.2787
Passed normality test (alpha=0.05)?	Yes	Yes
P value summary	ns	ns
D'Agostino & Pearson test
K2	0.3707	2.472
P value	0.8308	0.2906
Passed normality test (alpha=0.05)?	Yes	Yes
P value summary	ns	ns
Shapiro-Wilk test
W	0.9622	0.9243
P value	0.6441	0.154
Passed normality test (alpha=0.05)?	Yes	Yes
P value summary	ns	ns
Kolmogorov-Smirnov test
KS distance	0.1456	0.1442
P value	>0,1000	>0,1000
Passed normality test (alpha=0.05)?	Yes	Yes
P value summary	ns	ns
Number of values	18	18
Mann Whitney test
Table Analyzed	Data 1
Column B	shMDGA2
vs.	vs,
Column A	shCTRL
Mann Whitney test
P value	0.501
Exact or approximate P value?	Exact
P value summary	ns
Significantly different (P < 0.05)?	No
One- or two-tailed P value?	Two-tailed
Sum of ranks in column A,B	311 , 355
Mann-Whitney U	140
Difference between medians
Median of column A	1,900, n=18
Median of column B	1,878, n=18
Difference: Actual	-0.0224
Difference: Hodges-Lehmann	0.1308

## Sheet: Fig.6-S1D
Log (D)	shCTRL		shMDGA2
-5	25.41	1.856	21.67	1.954
-4.9	0	0	0.01747	0.01747
-4.8	0.09665	0.06583	0.02869	0.02869
-4.7	0	0	0	0
-4.6	0.07724	0.06281	0.06161	0.03197
-4.5	0	0	0.05288	0.03362
-4.4	0.02728	0.02728	0.1309	0.06416
-4.3	0.0817	0.03657	0.05768	0.04051
-4.2	0.2061	0.05632	0.1832	0.05782
-4.1	0.1912	0.04501	0.1435	0.05421
-4	0.06755	0.0436	0.1838	0.1162
-3.9	0.1434	0.07644	0.2625	0.04443
-3.8	0.2857	0.08024	0.2629	0.1091
-3.7	0.271	0.04925	0.3428	0.1131
-3.6	0.4828	0.04778	0.4819	0.17
-3.5	0.5337	0.08241	0.5441	0.2749
-3.4	0.7223	0.1712	0.7461	0.1463
-3.3	0.8604	0.2045	0.7526	0.2897
-3.2	0.7122	0.1897	1.522	0.3974
-3.1	1.417	0.1614	1.194	0.2016
-3	1.386	0.1632	1.477	0.3153
-2.9	1.631	0.2098	1.231	0.1707
-2.8	1.837	0.1768	1.754	0.2477
-2.7	1.979	0.2721	1.675	0.2888
-2.6	1.99	0.2405	2.157	0.3745
-2.5	1.787	0.2053	1.87	0.258
-2.4	2.229	0.09905	2.041	0.1998
-2.3	2.139	0.3413	1.949	0.1181
-2.2	2.173	0.1557	2.516	0.1596
-2.1	2.062	0.2763	2.527	0.5085
-2	2.207	0.2255	2.388	0.392
-1.9	2.265	0.2232	2.49	0.5453
-1.8	1.884	0.3496	2.774	0.5391
-1.7	2.446	0.2876	2.374	0.341
-1.6	1.472	0.2701	2.56	0.545
-1.5	2.034	0.1593	2.348	0.2025
-1.4	1.499	0.2446	2.171	0.3685
-1.3	2.034	0.3135	2.409	0.3188
-1.2	2.582	0.374	2.181	0.188
-1.1	2.648	0.5356	2.579	0.3422
-1	2.404	0.4574	2.989	0.3853
-0.9	2.318	0.432	2.705	0.5089
-0.8	2.104	0.2759	2.743	0.4242
-0.7	3.177	0.3411	3.184	0.4351
-0.6	2.95	0.3779	3.168	0.666
-0.5	3.488	0.1901	2.762	0.6107
-0.4	2.698	0.4167	2.436	0.5303
-0.3	2.837	0.3678	2.439	0.5039
-0.2	2.331	0.3625	1.915	0.4849
-0.1	1.772	0.4218	1.456	0.4077
0	1.117	0.151	1.021	0.3897
0.1	0.5196	0.1667	0.6018	0.2686
0.2	0.2162	0.09385	0.2547	0.08881
0.3	0.1108	0.0959	0.1147	0.05314
0.4	0.03255	0.03255	0.0716	0.04579
0.5	0.05699	0.04319	0.03139	0.03139
0.6	0	0	0	0
0.7	0	0	0	0
0.8	0	0	0	0
0.9	0	0	0	0
1	0	0	0	0
