# Supplementary material for: MDGAs are fast-diffusing molecules that delay excitatory synapse development by altering neuroligin behavior
Source: eLife. 2022 May 9;11:e75233. doi: 10.7554/eLife.75233 (PMC9084894; doi:10.7554/eLife.75233)
Supplement: Figure 6—source data 6. — Each graph (B,D,F,G) is shown in a separate sheet within the file. [file elife-75233-fig6-data6.xlsx]

## Sheet: Fig.6B
shCONTROL	shMDGA2	shMDGA2+rescue
0.907901	4.63363	1.76261		each value corresponds to a different cell
1.95408	3.04135	2.32513		three different cell cultures
2.52858	1.2946	2.05174
4.32252	4.48883	2.64087
2.83434	3.4682
1.73061	2.34588
3.01455	2.44824
1.6835	3.47256
1.61992	2.63631
3.1132	4.28862
2.0637	2.95406
4.1986	1.72876
5.71033	3.0348
2.61919	3.93125
2.46364	7.24
	2.908
Kruskal Wallis
Number of families	1
Number of comparisons per family	3
Alpha	0.05
Dunn's multiple comparisons test	Mean rank diff,	Significant?	Summary	Adjusted P Value
shCONTROL vs. shMDGA2	-5.95	No	ns	0.3185	A-C
shCONTROL vs. shMDGA2+rescue	4.55	No	ns	>0,9999	A-D
shMDGA2 vs. shMDGA2+rescue	10.5	No	ns	0.2004	C-D
Test details	Mean rank 1	Mean rank 2	Mean rank diff,	n1	n2	Z
shCONTROL vs. shMDGA2	15.8	21.75	-5.95	15	16	1.616
shCONTROL vs. shMDGA2+rescue	15.8	11.25	4.55	15	4	0.7891
shMDGA2 vs. shMDGA2+rescue	21.75	11.25	10.5	16	4	1.833
Mean of column A	2.718
Mean of column C	3.37
Difference between means (C - A) ± SEM	0,6520 ± 0,4751
95% confidence interval	-0,3196 to 1,624
R squared (eta squared)	0.06099
F test to compare variances
F, DFn, Dfd	1,254, 15, 14
P value	0.6777
P value summary	ns
Significantly different (P < 0.05)?	No
Data analyzed
Sample size, column A	15
Sample size, column C	16

## Sheet: Fig.6D
shCONTROL	shMDGA2	shMDGA2+rescue
3.38827	5.48577	3.2158		each value corresponds to a different cell
4.32437	2.74039	4.21637		three different cell cultures
4.76663	4.55305	2.11602
2.0808	4.80197	2.03351
2.56591	5.53158	2.63652
1.92167	4.31564	3.15279
2.33501	8.58766	2.77845
2.28797	4.16622
3.7269	4.15094
4.07604	3.24739
1.91742	1.40351
	8.06206
	2.26859
	2.74937
	2.59075
	2.81583
	2.99886
	3.01496
	4.23352
	2.02763
Kruskal Wallis
Number of families	1
Number of comparisons per family	3
Alpha	0.05
Dunn's multiple comparisons test	Mean rank diff,	Significant?	Summary	Adjusted P Value
shCONTROL vs. shMDGA2	-6.609	No	ns	0.3394	A-C
shCONTROL vs. shMDGA2+rescue	0.3766	No	ns	>0,9999	A-D
shMDGA2 vs. shMDGA2+rescue	6.986	No	ns	0.457	C-D
Test details	Mean rank 1	Mean rank 2	Mean rank diff,	n1	n2	Z
shCONTROL vs. shMDGA2	16.09	22.7	-6.609	11	20	1.584
shCONTROL vs. shMDGA2+rescue	16.09	15.71	0.3766	11	7	0.07009
shMDGA2 vs. shMDGA2+rescue	22.7	15.71	6.986	20	7	1.431

## Sheet: Fig.6F
shCONTROL	shMDGA2
100	212
100	137
100	173
100	120
100	109.7
100	236
100	227
Descriptive statistics
	shCONTROL	shMDGA2
Number of values	7	7
Minimum	100	109.7
Maximum	100	236
Range	0	126.3
Mean	100	173.5
Std. Deviation	0	52.47
Std. Error of Mean	0	19.83
Mann Wintney test
Table Analyzed	pTyr shM2
Column B	shMDGA2
vs.	vs,
Column A	shCONTROL
Mann Whitney test
P value	0.0006
Exact or approximate P value?	Exact
P value summary	***
Significantly different (P < 0.05)?	Yes
One- or two-tailed P value?	Two-tailed
Sum of ranks in column A,B	28 , 77
Mann-Whitney U	0
Difference between medians
Median of column A	100,0, n=7
Median of column B	173,0, n=7
Difference: Actual	73
Difference: Hodges-Lehmann	73

## Sheet: Fig.6G
shCONTROL	shMDGA2
100	97.65
100	147
100	90.11
100	110.56
100	71.7
100	111.6
100	156
100	141
Mann Whitney test
Table Analyzed	total Nlg1234
Column B	shMDGA2
vs.	vs,
Column A	shCONTROL
Mann Whitney test
P value	0.4042
Exact or approximate P value?	Exact
P value summary	ns
Significantly different (P < 0.05)?	No
One- or two-tailed P value?	Two-tailed
Sum of ranks in column A,B	60 , 76
Mann-Whitney U	24
Difference between medians
Median of column A	100,0, n=8
Median of column B	111,1, n=8
Difference: Actual	11.08
Difference: Hodges-Lehmann	11.08
