# Supplementary material for: MDGAs are fast-diffusing molecules that delay excitatory synapse development by altering neuroligin behavior
Source: eLife. 2022 May 9;11:e75233. doi: 10.7554/eLife.75233 (PMC9084894; doi:10.7554/eLife.75233)
Supplement: Figure 7—source data 1. — Each graph (B,C,D,F,G,H) is shown in a separate sheet within the file. [file elife-75233-fig7-data1.xlsx]

## Sheet: Fig.7B
Diffusion coefficient (µm²/s)	shCONTROL		shMDGA2
in log scale	mean	sem	mean	sem
-5	17.58	1.032	22.18	0.7393		Mean and SEM of n > 10 cells in each condition
-4.9	0.03107	0.01175	0.05091	0.01677
-4.8	0.02415	0.006954	0.02939	0.01056
-4.7	0.03237	0.006885	0.05694	0.01508
-4.6	0.03116	0.01104	0.04988	0.01373
-4.5	0.04914	0.01321	0.07168	0.02104
-4.4	0.05898	0.01278	0.1061	0.0279
-4.3	0.08921	0.02086	0.09608	0.02159
-4.2	0.1039	0.02037	0.1325	0.03685
-4.1	0.1113	0.02245	0.1279	0.01867
-4	0.1599	0.02026	0.2447	0.04359
-3.9	0.2001	0.02821	0.315	0.04732
-3.8	0.3112	0.03598	0.3493	0.07283
-3.7	0.3605	0.03105	0.5291	0.09303
-3.6	0.3954	0.03436	0.5779	0.0806
-3.5	0.5621	0.05881	0.6776	0.09431
-3.4	0.6627	0.05452	0.7676	0.08051
-3.3	0.7527	0.07254	0.8848	0.07915
-3.2	0.893	0.06514	1.248	0.158
-3.1	1.244	0.08523	1.413	0.1282
-3	1.363	0.08262	1.543	0.132
-2.9	1.449	0.114	1.889	0.1491
-2.8	1.796	0.09545	1.867	0.1662
-2.7	1.989	0.1049	2.382	0.1524
-2.6	2.202	0.1187	2.204	0.1665
-2.5	2.365	0.08693	2.661	0.2334
-2.4	2.702	0.1333	2.768	0.1415
-2.3	2.753	0.1149	2.716	0.1101
-2.2	2.653	0.1094	2.76	0.1389
-2.1	2.843	0.1347	2.81	0.175
-2	2.969	0.1725	2.855	0.1342
-1.9	2.909	0.1272	2.791	0.1965
-1.8	3.104	0.1571	2.829	0.1938
-1.7	3.091	0.1652	2.506	0.1663
-1.6	3.127	0.206	2.738	0.1667
-1.5	3.25	0.1438	2.951	0.1498
-1.4	3.405	0.1408	2.891	0.15
-1.3	3.557	0.1827	3.598	0.1487
-1.2	3.679	0.1707	3.579	0.238
-1.1	4.027	0.2187	3.467	0.2889
-1	3.731	0.1996	3.436	0.2386
-0.9	3.788	0.2644	3.441	0.1931
-0.8	3.635	0.269	2.803	0.1924
-0.7	3.038	0.2804	2.319	0.1628
-0.6	2.521	0.2345	1.583	0.1497
-0.5	1.7	0.2089	1.088	0.1273
-0.4	1.089	0.156	0.7838	0.1041
-0.3	0.748	0.1232	0.3778	0.06951
-0.2	0.4277	0.0883	0.2489	0.07401
-0.1	0.2257	0.05772	0.0928	0.02259
0	0.1443	0.04834	0.0726	0.03405
0.1	0.0341	0.01822	0.02213	0.01199
0.2	0.02098	0.0128	0.01961	0.01961
0.3	0.005082	0.003507	0	0
0.4	0.0086	0.006106	0.006645	0.006645
0.5	0	0	0	0
0.6	0	0	0	0
0.7	0	0	0	0
0.8	0	0	0	0
0.9	0	0	0	0
1	0	0	0	0

## Sheet: Fig.7C
shCONTROL	shMDGA2
0.0217668	0.00424151		Each point represents the median diffusion coefficient calculated for each cell analyzed
0.00827824	0.00603354
0.0101935	0.00561433
0.00659748	0.00740678
0.00812798	0.00877001
0.0120409	0.00977237
0.0155507	0.0075556
0.0258821	0.0069102
0.0144544	0.0159652
0.0026096
0.00687464
0.0165561
0.0105606
0.0259174
0.0229444
0.0207204
0.00980137
0.0126775
0.0116483
0.0148124
Descriptive statistics
	shCONTROL	shMDGA2
Number of values	20	12
Minimum	0.00261	0.002998
Maximum	0.02592	0.01597
Range	0.02331	0.01297
Mean	0.0139	0.007217
Std. Deviation	0.006633	0.003374
Std. Error of Mean	0.001483	0.0009741
Normality test
	shCONTROL	shMDGA2
Test for normal distribution
Anderson-Darling test
A2*	0.4057	0.5681
P value	0.3198	0.1113
Passed normality test (alpha=0.05)?	Yes	Yes
P value summary	ns	ns
D'Agostino & Pearson test
K2	1.199	10.54
P value	0.5491	0.0051
Passed normality test (alpha=0.05)?	Yes	No
P value summary	ns	**
Shapiro-Wilk test
W	0.9488	0.8708
P value	0.3494	0.0669
Passed normality test (alpha=0.05)?	Yes	Yes
P value summary	ns	ns
Kolmogorov-Smirnov test
KS distance	0.1232	0.21
P value	>0,1000	>0,1000
Passed normality test (alpha=0.05)?	Yes	Yes
P value summary	ns	ns
Number of values	20	12
unpaired t test
Table Analyzed	D values
Column C	shMDGA2
vs.	vs,
Column A	shCONTROL
Unpaired t test
P value	0.003
P value summary	**
Significantly different (P < 0.05)?	Yes
One- or two-tailed P value?	Two-tailed
t, df	t=3,234, df=30
How big is the difference?
Mean of column A	0.0139
Mean of column C	0.007217
Difference between means (C - A) ± SEM	-0,006684 ± 0,002067
95% confidence interval	-0,01091 to -0,002463
R squared (eta squared)	0.2585
F test to compare variances
F, DFn, Dfd	3,864, 19, 11
P value	0.0258
P value summary	*
Significantly different (P < 0.05)?	Yes
Data analyzed
Sample size, column A	20
Sample size, column C	12

## Sheet: Fig.7D
	IMMOBILE																						MOBILE
shCTRL	42.3913	54.5347	52.0833	59.5265	54.3668	49.0566	46.1641	34.9316	36.997	45.8673	55.7842	67.3418	55.2231	45.0509	50.9108	42.3477	41.8221	42.3019	51.7033	48.4062	49.317	46.0456	57.6087	45.4653	47.9167	40.4735	45.6332	50.9434	53.8359	65.0684	63.003	54.1327	44.2158	32.6582	44.7769	54.9491	49.0892	57.6523	58.1779	57.6981	48.2967	51.5938	50.683	53.9544
shMDGA2	60.4706	56.3616	58.9091	55.4426	53.6835	51.9139	55.9023	63.3862	56.2083	63.6142	55.2678	45.2604											39.5294	43.6384	41.0909	44.5574	46.3165	48.0861	44.0977	36.6138	43.7917	36.3858	44.7322	54.7396
					2 way ANOVA
					Table Analyzed	mob immob
					Two-way ANOVA	Ordinary
					Alpha	0.05
					Source of Variation	% of total variation	P value	P value summary	Significant?
					Interaction	22.86	<0,0001	****	Yes
					Row Factor	0	>0,9999	ns	No
					Column Factor	10.22	0.0041	**	Yes
					ANOVA table	SS (Type III)	DF	MS	F (DFn, DFd)	P value
					Interaction	904.8	1	904.8	F (1, 64) = 19,87	P<0,0001
					Row Factor	0	1	0	F (1, 64) = 0,000	P>0,9999
					Column Factor	404.5	1	404.5	F (1, 64) = 8,883	P=0,0041
					Residual	2914	64	45.53
					Difference between column means
					Predicted (LS) mean of IMMOBILE	52.55
					Predicted (LS) mean of MOBILE	47.45
					Difference between predicted means	5.104
					SE of difference	1.712
					95% CI of difference	1,683 to 8,524
					Difference between row means
					Predicted (LS) mean of shCTRL	50
					Predicted (LS) mean of shMDGA2	50
					Difference between predicted means	0
					SE of difference	1.712
					95% CI of difference	-3,421 to 3,421
					Interaction CI
					Mean diff, A1 - B1	-2.53
					Mean diff, A2 - B2	12.74
					(A1 -B1) - (A2 - B2)	-15.27
					95% CI of difference	-22,11 to -8,425
					(B1 - A1) - (B2 - A2)	15.27
					95% CI of difference	8,425 to 22,11

## Sheet: Fig.7F
Diffusion coefficient (µm²/s)	shCONTROL		shMDGA2
in log scale	mean	sem	mean	sem
-5	25.31	1.02	26.95	0.8244		Mean and SEM of n > 10 cells in each condition
-4.9	0.0179	0.01237	0.01583	0.007634
-4.8	0.007672	0.005881	0.01026	0.006117
-4.7	0.02208	0.0107	0.03943	0.01061
-4.6	0.02633	0.01469	0.03234	0.00884
-4.5	0.06871	0.0248	0.03901	0.01009
-4.4	0.05229	0.0195	0.07009	0.01833
-4.3	0.0473	0.01871	0.09142	0.02136
-4.2	0.08171	0.02255	0.1192	0.01482
-4.1	0.09021	0.02883	0.1052	0.02292
-4	0.09416	0.0274	0.1184	0.02137
-3.9	0.1224	0.02348	0.178	0.02348
-3.8	0.1913	0.04104	0.2206	0.02965
-3.7	0.2299	0.06691	0.332	0.04277
-3.6	0.2616	0.04427	0.413	0.05219
-3.5	0.4278	0.05745	0.5164	0.05209
-3.4	0.4757	0.1064	0.5271	0.05526
-3.3	0.6316	0.07371	0.7153	0.06629
-3.2	0.7304	0.0762	0.8179	0.09027
-3.1	0.8685	0.1007	1.005	0.0709
-3	1.149	0.1104	1.327	0.07953
-2.9	1.256	0.1436	1.607	0.1118
-2.8	1.656	0.134	1.727	0.1169
-2.7	1.85	0.1951	2.191	0.1198
-2.6	2.216	0.1982	2.314	0.1672
-2.5	2.198	0.1238	2.613	0.1504
-2.4	2.498	0.1802	2.792	0.1556
-2.3	2.256	0.2256	3.104	0.1032
-2.2	2.572	0.1867	3.074	0.1467
-2.1	2.587	0.2233	2.989	0.1247
-2	2.905	0.172	3.208	0.1142
-1.9	2.451	0.2159	2.937	0.1264
-1.8	2.91	0.2016	2.567	0.1046
-1.7	2.334	0.2535	2.528	0.1151
-1.6	2.532	0.2359	2.808	0.1059
-1.5	2.593	0.179	2.385	0.1192
-1.4	2.568	0.1809	2.612	0.1478
-1.3	2.958	0.106	2.801	0.1511
-1.2	2.883	0.2598	2.751	0.1738
-1.1	2.615	0.2718	2.718	0.1386
-1	2.602	0.2299	2.688	0.2055
-0.9	2.86	0.2271	2.436	0.1806
-0.8	2.577	0.2046	2.433	0.1831
-0.7	2.62	0.2112	1.987	0.1931
-0.6	2.743	0.3189	1.744	0.182
-0.5	1.95	0.3019	1.316	0.183
-0.4	1.874	0.2934	0.9423	0.1212
-0.3	1.39	0.2498	0.797	0.1125
-0.2	1.292	0.2692	0.6769	0.111
-0.1	1.115	0.2856	0.5452	0.0914
0	0.7493	0.1732	0.3766	0.05658
0.1	0.6458	0.1824	0.3427	0.06001
0.2	0.3806	0.1104	0.1487	0.02998
0.3	0.3042	0.06693	0.1098	0.0191
0.4	0.09675	0.04511	0.05976	0.01524
0.5	0.05199	0.02081	0.017	0.007163
0.6	0.002302	0.002302	0.00659	0.00659
0.7	0	0	0.001854	0.001854
0.8	0	0	0.003665	0.002565
0.9	0	0	0	0
1	0	0	0	0

## Sheet: Fig.7G
shMORB	shMDGA2
0.00392138	0.00475627		Each point represents the median diffusion coefficient calculated for each cell analyzed
0.00364744	0.0089346
0.0188889	0.00612902
0.0111758	0.00448257
0.0072859	0.00528164
0.0198382	0.00341967
0.0111983	0.00764383
0.0246082	0.00326019
0.00504807	0.0052147
0.0175527	0.00326751
0.0105713	0.00928918
0.00424049	0.00325577
	0.00397534
	0.00417206
	0.0078875
	0.00274903
Descriptive statistics
	shMORB	shMDGA2
Number of values	12	16
Minimum	0.003647	0.002749
Maximum	0.02461	0.009289
Range	0.02096	0.00654
Mean	0.0115	0.005232
Std. Deviation	0.007166	0.002136
Std. Error of Mean	0.002069	0.000534
Normality test
	shMORB	shMDGA2
Test for normal distribution
Anderson-Darling test
A2*	0.4719	0.7102
P value	0.1986	0.051
Passed normality test (alpha=0.05)?	Yes	Yes
P value summary	ns	ns
D'Agostino & Pearson test
K2	1.527	2.38
P value	0.4661	0.3043
Passed normality test (alpha=0.05)?	Yes	Yes
P value summary	ns	ns
Shapiro-Wilk test
W	0.9019	0.8846
P value	0.1678	0.0458
Passed normality test (alpha=0.05)?	Yes	No
P value summary	ns	*
Kolmogorov-Smirnov test
KS distance	0.1833	0.1783
P value	>0,1000	>0,1000
Passed normality test (alpha=0.05)?	Yes	Yes
P value summary	ns	ns
Number of values	12	16
unpaired t test
Table Analyzed	D
Column C	shMDGA2
vs.	vs,
Column A	shMORB
Unpaired t test
P value	0.0026
P value summary	**
Significantly different (P < 0.05)?	Yes
One- or two-tailed P value?	Two-tailed
t, df	t=3,325, df=26
How big is the difference?
Mean of column A	0.0115
Mean of column C	0.005232
Difference between means (C - A) ± SEM	-0,006266 ± 0,001885
95% confidence interval	-0,01014 to -0,002392
R squared (eta squared)	0.2983
F test to compare variances
F, DFn, Dfd	11,25, 11, 15
P value	<0,0001
P value summary	****
Significantly different (P < 0.05)?	Yes
Data analyzed
Sample size, column A	12
Sample size, column C	16

## Sheet: Fig.7H
	IMMOBILE																				MOBILE
shCTRL	57.8261	44.0285	50.6318	63.674	50.1281	62.6132	68.088	45.441	55.5892	42.4689	50	44.3124									42.1739	55.9715	49.3682	36.326		37.3868	31.912	54.559	49.8719		44.4108	57.5311	50	55.6876
shMDGA2	59.5445	66.0544	52.6535	68.3236	66.6401	65.2904	54.8814	73.2115		62.6072	52.8501	48.5759	58.3868	43.6754	61.7197		66.8001	55.538	65.3487	44.6026	40.4555	33.9456	47.3465	31.6764	33.3599	34.7096	45.1186	26.7885		37.3928	47.1499	51.4241	41.6132	56.3246	38.2803		33.1999	44.462	34.6513	55.3974
					2 way ANOVA
					Table Analyzed	mobile immobile
					Two-way ANOVA	Ordinary
					Alpha	0.05
					Source of Variation	% of total variation	P value	P value summary	Significant?
					Interaction	7.936	0.0063	**	Yes
					Row Factor	0	>0,9999	ns	No
					Column Factor	29.01	<0,0001	****	Yes
					ANOVA table	SS (Type III)	DF	MS	F (DFn, DFd)	P value
					Interaction	582.7	1	582.7	F (1, 56) = 8,052	P=0,0063
					Row Factor	0	1	0	F (1, 56) = 0,000	P>0,9999
					Column Factor	2130	1	2130	F (1, 56) = 29,43	P<0,0001
					Residual	4052	56	72.36
					Difference between column means
					Predicted (LS) mean of IMMOBILE	56.08
					Predicted (LS) mean of MOBILE	43.92
					Difference between predicted means	12.16
					SE of difference	2.242
					95% CI of difference	7,671 to 16,65
					Difference between row means
					Predicted (LS) mean of shCTRL	50
					Predicted (LS) mean of shMDGA2	50
					Difference between predicted means	0
					SE of difference	2.242
					95% CI of difference	-4,491 to 4,491
					Interaction CI
					Mean diff, A1 - B1	5.8
					Mean diff, A2 - B2	18.52
					(A1 -B1) - (A2 - B2)	-12.72
					95% CI of difference	-21,70 to -3,741
					(B1 - A1) - (B2 - A2)	12.72
					95% CI of difference	3,741 to 21,70
