# Supplementary material for: MDGAs are fast-diffusing molecules that delay excitatory synapse development by altering neuroligin behavior
Source: eLife. 2022 May 9;11:e75233. doi: 10.7554/eLife.75233 (PMC9084894; doi:10.7554/eLife.75233)
Supplement: Figure 8—figure supplement 1—source data 1. — Each graph (C,E,F) is shown in a separate sheet within the file. [file elife-75233-fig8-figsupp1-data1.xlsx]

## Sheet: Fig.8-S1C
CRISPR control	CRISPR MDGA1
1.2586	0.935763
1.71879	0.193828
1.18023	0.0897512
0.635837	0.444267
0.652571	0.486433
0.732094	0.192845
0.702415	0.0667658
0.755692	0.0542607
0.542302	0.1627
0.575173	0.113956
0.359674	0.0529202
0.44659	0.169785
1.24735	0.0495221
1.04998
1.91202
1.87035
1.99001
0.567451
0.477902
0.794549
0.571941
1.47975
1.47874
Descriptive statistics
	CRISPR control	CRISPR MDGA1
Number of values	23	13
Minimum	0.3597	0.04952
Maximum	1.99	0.9358
Range	1.63	0.8862
Mean	1	0.2318
Std. Deviation	0.5211	0.2542
Std. Error of Mean	0.1086	0.07049
Kruskal Wallis test
Table Analyzed	crispr MDGA1
Column B	CRISPR MDGA1
vs.	vs,
Column A	CRISPR control
Mann Whitney test
P value	<0,0001
Exact or approximate P value?	Exact
P value summary	****
Significantly different (P < 0.05)?	Yes
One- or two-tailed P value?	Two-tailed
Sum of ranks in column A,B	558 , 108
Mann-Whitney U	17
Difference between medians
Median of column A	0,7557, n=23
Median of column B	0,1627, n=13
Difference: Actual	-0.593
Difference: Hodges-Lehmann	-0.6017

## Sheet: Fig.8-S1E
	# of primary dendrites per neuron			Histogram	Occurrence frequency (%)
	CRISPR CTRL	CRISPR MDGA1		# dendrites	CRISPR CTRL	CRISPR MDGA1
	4	11		1	0	0
	5	4		2	18.5185	24
	6	6		3	18.5185	4
	3	2		4	33.3333	36
	7	4		5	11.1111	8
	6	6		6	14.8148	12
	5	4		7	3.7037	8
	3	4		8	0	8
	4	6		9	0	0
	2	7		10	0	0
	2	4
	3	4		Sum	100	100
	4	2
	2	2
	4	2
	6	2
	6	2
	3	5
	4	5
	4	7
	2	4
	3	8
	5	8
	4	3
	2	4
	4	4
	4
Total # of neurons	27	26
Statistical test
Table Analyzed	Histogram of Data 1:Frequency distribution
Column B	CRISPR MDGA1
vs.	vs.
Column A	CRISPR CTRL
Mann Whitney test
P value	0.9526
Exact or approximate P value?	Exact
P value summary	ns
Significantly different (P < 0.05)?	No
One- or two-tailed P value?	Two-tailed
Sum of ranks in column A,B	104 , 106
Mann-Whitney U	49
Difference between medians
Median of column A	7.407, n=10
Median of column B	8.000, n=10
Difference: Actual	0.5926
Difference: Hodges-Lehmann	0

## Sheet: Fig.8-S1F
Dendrite length (µm)
CRISPR control	CRISPR MDGA1
53.311	68.832
23.861	27.238
14.855	60.308
23.291	14.28
28.463	68.675
25.867	79.741
29.746	16.782
38.325	28.171
34.853	13.833
32.124	18.15
25.074	77.132
25.483	68.016
25.642	102.251
30.772	106.298
17.2	19.748
54.553	12.488		Descriptive statistics
11.901	16.617
34.123	33.105			CRISPR control	CRISPR MDGA1
73.217	19.484		Number of values	66	46
22.133	47.615
12.317	17.766		Minimum	8.346	12.49
23.835	20.82		Maximum	93.63	106.3
93.63	56.426		Range	85.28	93.81
12.743	51.38
18.908	41.677		Mean	35.21	40.42
48.924	73.457		Std. Deviation	18.96	27.34
39.378	24.911		Std. Error of Mean	2.334	4.031
21.375	24.911
26.281	17.701
78.281	42.185		Statistical test
52.374	75.572
22.258	45.153		Table Analyzed	primary dendrite length
66.663	35.728
16.748	18.635		Column B	CRISPR MDGA1
56.765	14.205		vs.	vs.
10.38	19.218		Column A	CRISPR control
69.68	16.956
30.449	16.208		Mann Whitney test
8.346	16.675		P value	0.8795
32.301	12.569		Exact or approximate P value?	Exact
14.967	18.027		P value summary	ns
35.064	17.347		Significantly different (P < 0.05)?	No
49.558	46.589		One- or two-tailed P value?	Two-tailed
61.13	64.677		Sum of ranks in column A,B	3703 , 2625
65.893	75.903		Mann-Whitney U	1492
25.332	95.915
31.055			Difference between medians
55.531			Median of column A	30.10, n=66
26.165			Median of column B	27.70, n=46
32.343			Difference: Actual	-2.393
26.101			Difference: Hodges-Lehmann	0.6775
41.036
26.542
45.195
60.564
36.364
13.181
18.797
19.552
18.921
48.579
48.579
67.924
16.516
46.227
26.5
