# Supplementary material for: MDGAs are fast-diffusing molecules that delay excitatory synapse development by altering neuroligin behavior
Source: eLife. 2022 May 9;11:e75233. doi: 10.7554/eLife.75233 (PMC9084894; doi:10.7554/eLife.75233)
Supplement: Figure 8—figure supplement 2—source data 1. — Each graph (B,C,E,F,G) is shown in a separate sheet within the file. [file elife-75233-fig8-figsupp2-data1.xlsx]

## Sheet: Fig.8-S2B
	Detected	Not detected
Control	5	0
MDGA1 CRISPR	1	4
Statistical test
Table Analyzed	MDGA1_contingency
P value and statistical significance
Test	Chi-square
Chi-square, df	6.667, 1
z	2.582
P value	0.0098
P value summary	**
One- or two-sided	Two-sided
Statistically significant (P < 0.05)?	Yes
Effect size	Value	95% CI
Sensitivity	0.8333	0.4365 to 0.9915
Specificity	1	0.5101 to 1.000
Positive Predictive Value	1	0.5655 to 1.000
Negative Predictive Value	0.8	0.3755 to 0.9897
Likelihood Ratio
Methods used to compute CIs
Sensitivity, specificity, etc.	Wilson-Brown
Data analyzed	WT	KO	Total
Control	5	0	5
MDGA1 CRISPR	1	4	5
Total	6	4	10
Percentage of row total	WT	KO
Control	1	0
MDGA1 CRISPR	0.2	0.8
Percentage of column total	WT	KO
Control	0.8333	0
MDGA1 CRISPR	0.1667	1
Percentage of grand total	WT	KO
Control	0.5	0
MDGA1 CRISPR	0.1	0.4

## Sheet: Fig.8-S2C
	Detected	Not detected
Control	5	0
MDGA2_CRISPR	1	4
Statistical test
Table Analyzed	MDGA2_contingency
P value and statistical significance
Test	Chi-square
Chi-square, df	6.667, 1
z	2.582
P value	0.0098
P value summary	**
One- or two-sided	Two-sided
Statistically significant (P < 0.05)?	Yes
Data analyzed	WT	KO	Total
Control	5	0	5
MDGA2_CRISPR	1	4	5
Total	6	4	10
Percentage of row total	WT	KO
Control	1	0
MDGA2_CRISPR	0.2	0.8
Percentage of column total	WT	KO
Control	0.8333	0
MDGA2_CRISPR	0.1667	1
Percentage of grand total	WT	KO
Control	0.5	0
MDGA2_CRISPR	0.1	0.4

## Sheet: Fig.8-S2E
Condition		CRISPR_CTRL												CRISPR_MDGA1												CRISPR_MDGA2
	Cell #	Cell 1		Cell 2		Cell 3		Cell 4		Cell 5		Average_CTRL		Cell 1		Cell 2		Cell 3		Cell 4		Cell 5		Average_MDGA1		Cell 1		Cell 2		Cell 3		Cell 4		Cell 5		Average_MDGA2
Gene ID	Sum of reads	1643420		2715112		176777		247690		439596		LOG scale		967802		296479		937211		43279		1248203		LOG scale		555054		289254		761242		1254432		105107		LOG scale
ENSRNOG00000011015	# reads	1567	954.108	188	69.6104	83	475.175	335	1356.53	305	696.094	2.85144		830	858.647	321	1086.08	539	576.178	0	23.1059	4186	3354.42	3.07177		367	662.999	695	2406.19	8	11.8228	549	438.445	129	1236.83	2.9783
ENSRNOG00000058050		2194	1335.63	831	306.433	69	395.979	90	367.395	667	1519.58	2.89487		682	705.723	85	290.071	318	340.372	1	46.2118	8812	7060.55	3.22752		743	1340.41	887	3069.97	1184	1556.67	2767	2206.58	119	1141.69	3.27023
ENSRNOG00000013969		6704	4079.91	17530	6456.82	329	1866.76	582	2353.75	1521	3462.27	3.56157		2215	2289.72	575	1942.8	836	893.075	3	92.4236	3	3.20461	3.0188		2903	5231.92	901	3118.37	96	127.423	1883	1501.87	102	979.954	3.34082
ENSRNOG00000012609		112	68.7591	6	2.57816	14	84.8527	190	771.125	32	75.0689	2.30206		92	96.094	33	114.679	246	263.548	18	439.012	161	129.787	2.31936		83	151.337	97	338.803	947	1245.33	145	116.387	10	104.655	2.59251
ENSRNOG00000012324		85	52.3299	414	152.848	47	271.529	87	355.283	392	894.003	2.53807		1163	1202.73	27	94.4418	36	39.4788	74	1732.94	27	22.4322	2.79127		82	149.535	113	394.117	1	2.62729	894	713.47	18	180.768	2.45955
ENSRNOG00000034075		1070	651.69	134	49.7217	28	164.048	60	246.276	58	134.214	2.39653		332	344.079	87	296.817	936	999.775	26	623.859	108	87.3255	2.67244		1	3.60325	27	96.8007	116	153.696	67	54.2078	2	28.5423	1.82847
ENSRNOG00000018960		7538	4587.38	13003	4789.49	567	3213.09	2817	11377.1	2946	6703.88	3.78776		2699	2789.83	964	3254.87	3748	4000.17	18	439.012	7	6.40921	3.32182		1419	2558.31	420	1455.47	20	27.5865	4265	3400.74	248	2369.01	3.29275
ENSRNOG00000016728		932	567.719	3069	1130.71	12	73.539	678	2741.33	123	282.077	2.98185		262	271.75	61	209.121	274	293.424	142	3304.14	68	55.2795	2.91737		45	82.8748	13	48.4004	106	140.56	31	25.5096	4	47.5706	1.83874
ENSRNOG00000053052		52	32.2498	139	51.5633	26	152.735	347	1404.98	65	150.138	2.55429		49	51.6635	10	37.1021	347	371.314	16	392.8	392	314.853	2.36837		15	28.826	32	114.087	290	382.27	170	136.317	17	171.254	2.22155
ENSRNOG00000014791		5663	3446.47	7925	2919.22	335	1900.7	1380	5575.52	1822	4146.99	3.55603		4036	4171.31	2932	9892.77	359	384.118	1490	34450.9	1684	1349.94	4.00216		4030	7262.36	1769	6119.19	3651	4797.42	6889	5492.53	551	5251.79	3.76228
ENSRNOG00000053828		3915	2382.84	6035	2223.11	687	3891.91	1528	6173.04	387	882.629	3.49286		490	507.335	794	2681.47	82	88.5606	0	23.1059	19	16.023	2.82171		18	34.2309	265	919.607	2468	3243.38	2713	2163.53	7	76.1129	3.1097
ENSRNOG00000018642		2511	1528.52	7853	2892.7	380	2155.26	2	12.1119	855	1947.24	3.23228		1001	1035.34	600	2027.13	394	421.463	14	346.588	7	6.40921	2.88501		1691	3048.35	950	3287.77	3	5.25457	959	765.287	174	1664.97	3.24411
ENSRNOG00000016770		278	169.768	185	68.5055	54	311.126	392	1586.66	29	68.2445	2.6443		436	451.539	997	3366.17	378	404.391	2	69.3177	314	252.363	2.95845		136	246.823	552	1911.81	2705	3554.72	163	130.736	38	371.05	3.09448
ENSRNOG00000015085		176	107.702	3223	1187.43	317	1798.88	148	601.558	312	712.017	2.94523		497	514.568	94	320.427	2338	2495.7	69	1617.41	4385	3513.85	3.2285		910	1641.28	1244	4304.18	2306	3030.57	1086	866.528	70	675.502	3.32297
ENSRNOG00000020263		1873	1140.3	1817	669.586	690	3908.88	1286	5196.01	383	873.529	3.37248		1062	1098.37	874	2951.31	54	58.6848	0	23.1059	4751	3807.07	3.20077		1328	2394.36	620	2146.9	972	1278.17	455	363.511	521	4966.37	3.34828
ENSRNOG00000052687		1787	1087.98	4171	1536.58	356	2019.49	1061	4287.62	426	971.346	3.2968		1105	1142.8	368	1244.61	1026	1095.8	0	23.1059	750	601.665	2.91466		56	102.693	38	134.83	24	32.8411	2942	2346.08	94	903.841	2.84761
ENSRNOG00000055371		203	124.131	165	61.1393	19	113.137	57	234.164	51	118.29	2.11452		79	82.6615	184	623.99	3	4.26798	4	115.529	10	8.81267	2.22285		9	18.0163	70	245.459	221	291.629	0	0.797174	10	104.655	2.12094
ENSRNOG00000032034		212	129.608	4424	1629.77	55	316.783	153	621.745	50	116.016	2.75034		83	86.7946	499	1686.46	1224	1307.07	0	23.1059	626	502.322	2.85803		36	66.6602	40	141.744	1283	1686.72	398	318.072	78	751.615	2.77303
ENSRNOG00000019207		7319	4454.13	6231	2295.3	607	3439.36	133	540.999	228	520.933	3.35221		863	892.745	951	3211.02	2605	2780.59	38	901.13	1577	1264.22	3.25766		2036	3669.91	561	1942.93	1429	1878.51	1567	1249.97	208	1988.45	3.33162
ENSRNOG00000026163		8	5.47638	7	2.94647	59	339.411	171	694.416	19	45.4963	2.33756		35	37.1977	188	637.482	602	643.398	2	69.3177	5708	4573.78	3.07636		336	607.148	941	3256.65	0	1.31364	1322	1054.66	76	732.587	3.05326
ENSRNOG00000020650		1256	764.868	630	232.403	409	2319.31	4	20.1865	556	1267.07	2.96415		2032	2100.64	655	2212.64	342	365.979	67	1571.2	3715	2977.08	3.26612		1799	3242.93	375	1299.9	7	10.5091	4868	3881.44	279	2663.95	3.3463
ENSRNOG00000020763		3547	2158.91	5034	1854.44	620	3512.9	439	1776.41	744	1694.74	3.34232		941	973.34	553	1868.6	3148	3359.97	132	3073.08	5484	4394.32	3.43678		805	1452.11	1094	3785.6	93	123.482	3641	2903.31	125	1198.78	3.27707
ENSRNOG00000013981		3790	2306.77	33457	12322.9	1169	6618.51	119	484.477	2391	5441.36	3.73518		2452	2534.61	1043	3521.33	14316	15276.2	21	508.33	3528	2827.26	3.69316		3011	5426.5	1785	6174.5	4336	5697.27	3481	2775.76	26	256.881	3.60919
ENSRNOG00000014530		499	304.244	2731	1006.22	98	560.028	24	100.933	1079	2456.8	2.94726		1055	1091.13	633	2138.43	734	784.242	2	69.3177	39	32.0461	2.91542		1184	2134.93	0	3.45717	9	13.1364	2882	2298.25	47	456.677	2.9918
ENSRNOG00000013718		2999	1825.46	2976	1096.46	28	164.048	632	2555.61	232	530.032	3.09143		3123	3227.93	908	3065.98	17	19.2059	0	23.1059	53	43.2622	3.10582		1892	3410.48	616	2133.07	1357	1783.93	2469	1969.02	2	28.5423	3.27068
ENSRNOG00000015734		1939	1180.47	5322	1960.51	100	571.341	14	60.5596	35	81.8934	2.88703		872	902.044	327	1106.32	3435	3666.2	1	46.2118	3853	3087.64	3.24593		289	522.472	43	152.115	114	151.069	2697	2150.77	126	1208.29	2.9227
ENSRNOG00000010146		99	60.8487	1698	625.757	8	50.9116	55	226.089	421	959.972	2.58514		232	240.752	132	448.598	394	421.463	48	1132.19	223	179.458	2.68529		241	435.994	24	86.4292	4385	5761.64	990	789.999	10	104.655	3.15708
ENSRNOG00000016358		176	107.702	2409	887.625	95	543.057	635	2567.73	80	184.26	2.93352		1536	1588.13	116	394.632	6601	7044.3	3	92.4236	257	206.697	3.27073		358	646.784	35	124.458	118	156.323	295	235.963	33	323.48	2.47334
ENSRNOG00000023496		165	101.009	19	7.36618	4	28.2842	8	36.3357	5	13.6489	1.57204		5	6.19962	2	10.1188	17	19.2059	1	46.2118	4	4.00576	1.23422		8	16.2146	4	17.2858	2	3.94093	8	7.17456	2	28.5423	1.16529
ENSRNOG00000018674		854	520.257	590	217.671	3	22.6274	269	1090.07	283	646.048	2.69839		235	243.852	523	1767.41	1364	1456.45	385	8918.88	0	0.801152	3.39401		97	176.559	880	3045.77	2788	3663.75	587	468.738	123	1179.75	3.23221
ENSRNOG00000019249		567	345.621	355	131.118	38	220.617	136	553.111	418	953.148	2.64417		382	395.742	208	704.94	3	4.26798	0	23.1059	250	201.089	2.4246		1126	2030.43	809	2800.31	14	19.7046	68	55.005	153	1465.17	3.10521
ENSRNOG00000011151		1669	1016.17	2947	1085.77	55	316.783	130	528.887	2338	5320.79	3.21845		1735	1793.76	569	1922.56	2139	2283.37	27	646.965	573	459.861	3.15269		18	34.2309	90	314.602	703	924.804	283	226.397	14	142.712	2.5166
ENSRNOG00000053502		6751	4108.51	2664	981.543	17	101.823	375	1518.03	398	907.652	3.18285		1696	1753.46	171	580.142	4880	5208.01	69	1617.41	221	177.856	3.27123		1082	1951.16	168	584.262	813	1069.31	479	382.643	42	409.107	2.94413
ENSRNOG00000019270		7	4.8679	7	2.94647	21	124.451	4	20.1865	14	34.1222	1.57188		12	13.4325	11	40.475	52	56.5508	28	670.071	9	8.01152	2.19785		23	43.239	20	72.6006	47	63.0548	18	15.1463	5	57.0847	1.70092
ENSRNOG00000009812		749	456.365	1699	626.125	3	22.6274	3	16.1492	649	1478.63	2.71599		877	907.21	82	279.952	28	30.9429	3	92.4236	10	8.81267	2.42139		2195	3956.37	9	34.5717	19	26.2729	17	14.3491	0	9.51411	2.90753
ENSRNOG00000012806		3658	2226.45	7108	2618.31	234	1329.36	1	8.07461	445	1014.57	3.15817		1627	1682.16	180	610.499	1714	1829.9	6	161.741	3571	2861.71	3.15509		415	749.477	218	757.12	5323	6993.83	546	436.054	10	104.655	3.25725
ENSRNOG00000024737		1958	1192.03	2721	1002.54	1	11.3137	56	230.126	37	86.443	2.70285		847	876.212	67	229.359	173	185.657	10	254.165	5173	4145.16	3.05618		591	1066.56	407	1410.53	6	9.1955	951	758.909	114	1094.12	2.93845
ENSRNOG00000059451		22	13.9952	100	37.1992	3	22.6274	21	88.8207	65	150.138	1.79627		6	7.23288	7	26.9834	37	40.5458	6	161.741	4	4.00576	1.68216		9	18.0163	0	3.45717	34	45.9775	33	27.1039	19	190.282	1.75563
ENSRNOG00000016218		386	235.485	3746	1380.05	15	90.5095	51	209.94	306	698.369	2.71839		339	351.312	85	290.071	303	324.367	31	739.389	671	538.374	2.65196		140	254.029	90	314.602	0	1.31364	1843	1469.99	33	323.48	2.67457
ENSRNOG00000018686		3187	1939.86	7306	2691.23	210	1193.59	794	3209.66	1474	3355.35	3.39409		1816	1877.45	84	286.698	113	121.637	0	23.1059	5229	4190.02	3.11387		1139	2053.85	559	1936.01	12	17.0774	876	699.121	210	2007.48	3.12798
ENSRNOG00000052802		906	551.898	2607	960.55	38	220.617	289	1170.82	47	109.191	2.78004		281	291.382	697	2354.3	2496	2664.29	5	138.635	9624	7711.09	3.42028		192	347.714	4	17.2858	1226	1611.84	135	108.416	8	85.627	2.63767
ENSRNOG00000019193		28	17.6461	170	62.9808	6	39.5979	9	40.373	142	325.299	1.98757		213	221.12	69	236.104	20	22.4069	98	2287.48	1635	1310.68	2.91146		1347	2428.59	14	51.8575	2	3.94093	422	337.204	27	266.395	2.79071
ENSRNOG00000024414		1331	810.505	335	123.752	110	627.91	569	2301.26	39	90.9926	2.89811		875	905.144	520	1757.29	2509	2678.16	40	947.342	291	233.936	3.1154		58	106.296	51	179.773	881	1158.63	130	104.43	21	209.311	2.54616
ENSRNOG00000020451		1347	820.241	3331	1227.21	118	673.164	790	3193.51	715	1628.77	3.17857		152	158.09	157	532.921	7343	7836.02	358	8295.02	1882	1508.57	3.56421		813	1466.52	250	867.749	2845	3738.63	790	630.564	211	2016.99	3.24157
ENSRNOG00000058842		4215	2565.38	3136	1155.39	138	786.301	509	2059.03	137	313.925	3.13862		845	874.146	1424	4806.41	2432	2596	2	69.3177	27074	21691.2	3.77869		1319	2378.15	599	2074.3	2076	2728.44	2046	1631.81	41	399.593	3.2654
ENSRNOG00000019745		135	82.7543	82	30.5696	12	73.539	184	746.901	39	90.9926	2.31165		52	54.7633	22	77.5772	365	390.52	9	231.059	82	66.4956	2.21506		6	12.6114	44	155.573	247	325.783	133	106.821	9	95.1411	2.1436
ENSRNOG00000020660		290	177.07	371	137.011	45	260.215	259	1049.7	70	161.512	2.55279		290	300.681	242	819.62	4	5.33498	24	577.647	9	8.01152	2.53435		293	529.678	0	3.45717	1587	2086.06	485	387.426	57	551.819	2.85229
ENSRNOG00000062155		8994	5473.34	13035	4801.28	1445	8179.8	813	3286.37	2536	5771.21	3.74055		4968	5134.31	1057	3568.55	9032	9638.17	112	2610.97	11380	9117.91	3.77916		4934	8891.03	2941	10171	0	1.31364	11278	8991.32	744	7088.02	3.84686
ENSRNOG00000062127		57566	35028.8	22698	8360.24	8653	48954.3	1921	7759.7	5299	12056.5	4.35087		20477	21159.3	6860	23141.6	12890	13754.6	417	9658.26	30029	24058.6	4.26374		33454	60273.4	5577	19284.1	5717	7511.41	28384	22627.8	1761	16763.9	4.40299
ENSRNOG00000062158		666279	405423	1238373	456104	56931	322055	64704	261234	163138	371111	5.56013		404019	417461	87703	295819	416876	444806	8940	206590	343614	275288	5.51586		157062	282969	91312	315684	34625	45486.2	506056	403415	58239	554102	5.5056
ENSRNOG00000021103		1587	966.278	166	61.5076	180	1023.89	366	1481.69	330	752.964	2.93312		1421	1469.31	179	607.126	1496	1597.29	68	1594.31	486	390.161	3.05371		806	1453.91	265	919.607	388	511.007	88	70.9484	26	256.881	2.80785
ENSRNOG00000013239		200	122.306	674	248.609	3	22.6274	304	1231.38	23	54.5956	2.52621		229	237.652	12	43.848	10	11.737	14	346.588	3	3.20461	2.10926		96	174.758	500	1732.04	2	3.94093	43	35.0756	0	9.51411	2.59225
ENSRNOG00000030572		3548	2159.52	982	362.048	161	916.409	34	141.306	1160	2641.06	3.09484		184	191.155	32	111.306	10	11.737	162	3766.26	1543	1236.98	3.02673		776	1399.86	34	121.001	46	61.7412	3202	2553.35	4	47.5706	2.92257
ENSRNOG00000015658		1541	938.287	1377	507.53	161	916.409	1	8.07461	31	72.7941	2.68897		964	997.105	49	168.646	1006	1074.46	3	92.4236	2380	1907.54	2.92841		784	1414.28	264	916.15	3877	5094.31	2473	1972.21	88	846.756	3.31149
ENSRNOG00000046005		1145	697.326	238	88.0258	3	22.6274	328	1328.27	1062	2418.13	2.95946		16	17.5656	7	26.9834	14	16.0049	14	346.588	213	171.446	2.0634		242	437.795	187	649.948	1218	1601.33	316	252.704	3	38.0565	2.77522
ENSRNOG00000049308		22	13.9952	16	6.26125	1	11.3137	3	16.1492	105	241.13	1.7617		14	15.499	4	16.8646	48	52.2828	8	207.953	20	16.8242	1.79158		10	19.8179	2	10.3715	3	5.25457	15	12.7548	5	57.0847	1.32339
ENSRNOG00000020304		1372	835.453	28	10.681	356	2019.49	411	1663.37	471	1073.71	3.04943		1212	1253.36	127	431.734	445	475.88	53	1247.72	0	0.801152	2.83372		159	288.26	56	197.059	64	85.3868	820	654.479	16	161.74	2.44308
ENSRNOG00000030237		821	500.176	2090	770.134	177	1006.92	93	379.507	544	1239.77	2.89171		790	817.316	398	1345.8	502	536.699	150	3488.99	626	502.322	3.12653		185	335.103	40	141.744	1718	2258.15	1702	1357.59	4	47.5706	2.91805
ENSRNOG00000017428		3004	1828.5	5504	2027.54	1899	10748	1431	5781.42	1424	3241.61	3.67444		3981	4114.48	1632	5507.98	208	223.002	20	485.224	363	291.619	3.32725		1867	3365.44	1328	4594.58	3060	4021.06	5450	4345.39	181	1731.57	3.5577
ENSRNOG00000052167		323	197.15	605	223.195	34	197.99	51	209.94	121	277.528	2.34471		191	198.388	68	232.731	359	384.118	7	184.847	128	103.349	2.34378		78	142.328	60	210.887	84	111.66	175	140.303	23	228.339	2.22194
ENSRNOG00000027410		56	34.6838	90	33.5161	15	90.5095	231	936.655	8	20.4733	2.34863		39	41.3308	2	10.1188	182	195.26	6	161.741	61	49.6714	1.96201		6	12.6114	71	248.916	52	69.6231	35	28.6982	4	47.5706	1.91107
ENSRNOG00000018903		1779	1083.11	6	2.57816	5	33.9411	42	173.604	145	332.123	2.51198		698	722.255	308	1042.23	439	469.478	468	10836.7	2454	1966.83	3.4782		581	1048.55	495	1714.76	1443	1896.9	1437	1146.34	50	485.22	3.0998
ENSRNOG00000032735		1795	1092.84	4877	1796.61	212	1204.91	90	367.395	761	1733.41	3.09308		1164	1203.76	251	849.976	2334	2491.43	0	23.1059	2579	2066.97	3.12289		243	439.597	1532	5299.84	5387	7077.91	48	39.0615	102	979.954	3.44205
ENSRNOG00000056907		1609	979.664	4590	1690.91	296	1680.08	19	80.7461	391	891.728	3.0272		411	425.707	203	688.076	153	164.317	0	23.1059	192	154.622	2.46414		155	281.054	1231	4259.23	25	34.1547	791	631.361	2	28.5423	3.01989
ENSRNOG00000011627		1589	967.495	9737	3586.59	91	520.43	423	1711.82	371	846.232	3.1837		1339	1384.58	660	2229.5	280	299.826	198	4598.07	123	99.3428	3.2361		2013	3628.48	313	1085.55	1	2.62729	7013	5591.38	37	361.536	3.32918
ENSRNOG00000012148		4619	2811.21	125	46.4069	309	1753.62	95	387.581	2085	4745.27	3.28977		593	613.762	286	968.028	3079	3286.35	72	1686.73	3401	2725.52	3.2686		946	1706.14	1695	5863.36	1230	1617.09	1381	1101.69	38	371.05	3.32876
ENSRNOG00000011705		11857	7215.44	509	187.838	36	209.303	23	96.8953	825	1879	3.28278		6238	6446.57	2190	7390.07	1744	1861.91	0	23.1059	15217	12191.9	3.74685		4069	7332.62	795	2751.91	6473	8504.52	1786	1424.55	125	1198.78	3.62762
ENSRNOG00000012422		263	160.641	1639	604.027	74	424.263	9	40.373	1081	2461.35	2.86813		505	522.834	56	192.256	952	1016.85	29	693.177	5691	4560.16	3.14521		1535	2767.3	555	1922.19	1528	2008.56	1141	910.372	149	1427.12	3.25698
ENSRNOG00000038436		680	414.38	249	92.0772	723	4095.56	1	8.07461	799	1819.85	3.10924		1035	1070.47	709	2394.77	1388	1482.06	41	970.448	1120	898.091	3.13455		337	608.95	262	909.235	1895	2490.67	509	406.559	155	1484.2	3.07185
ENSRNOG00000031974		63	38.9432	78	29.0964	98	560.028	95	387.581	14	34.1222	2.32212		30	32.0313	15	53.9667	268	287.022	7	184.847	100	80.9163	2.10638		7	14.413	20	72.6006	146	193.105	68	55.005	4	47.5706	1.88388
ENSRNOG00000013045		353	215.404	5	2.20985	62	356.381	10	44.4104	310	707.468	2.42353		67	70.2623	127	431.734	15	17.0719	0	23.1059	941	754.685	2.41392		654	1180.07	274	950.722	12	17.0774	3	3.18869	53	513.762	2.7267
ENSRNOG00000032922		4692	2855.63	10120	3727.65	187	1063.49	1112	4493.52	417	950.873	3.41801		932	964.04	1369	4620.9	738	788.51	18	439.012	91	73.706	3.13901		600	1082.78	2050	7090.65	1	2.62729	3101	2472.83	32	313.966	3.34095
ENSRNOG00000051865		45	27.9904	211	78.0815	26	152.735	124	504.663	279	636.948	2.44729		25	26.865	13	47.2209	457	488.684	116	2703.39	198	159.429	2.83577		37	68.4618	100	349.174	100	132.678	111	89.2834	22	218.825	2.23473
ENSRNOG00000010680		40	24.948	1315	484.695	216	1227.54	4	20.1865	22	52.3208	2.55863		168	174.622	40	138.29	1	2.13399	21	508.33	2	2.40346	2.21789		144	261.236	99	345.717	243	320.529	1540	1228.44	7	76.1129	2.64973
ENSRNOG00000027833		40	24.948	108	40.1457	10	62.2253	623	2519.28	46	106.916	2.74092		650	672.658	68	232.731	411	439.602	6	161.741	263	211.504	2.53611		59	108.098	22	79.5149	240	316.588	102	82.1089	0	9.51411	2.07615
ENSRNOG00000054204		13220	8044.81	7796	2871.7	464	2630.43	451	1824.86	922	2099.66	3.54336		3125	3230	1037	3501.09	2428	2591.73	67	1571.2	1169	937.348	3.37407		3250	5857.09	1121	3878.94	2869	3770.15	9611	7662.43	663	6317.37	3.74014
ENSRNOG00000049530		421	256.782	142	52.6682	2	16.9705	107	436.029	258	589.177	2.43189		70	73.3621	102	347.411	62	67.2207	4	115.529	18	15.2219	2.09254		17	32.4293	135	470.175	26	35.4684	106	85.2976	0	9.51411	2.10235
ENSRNOG00000010889		625	380.913	1344	495.376	139	791.958	25	104.97	230	525.482	2.66251		563	582.764	88	300.19	731	781.041	3	92.4236	0	0.801152	2.54586		307	554.901	54	190.144	523	688.349	3149	2511.1	30	294.938	2.92834
ENSRNOG00000042261		18	11.5613	69	25.7816	0	5.65684	22	92.858	30	70.5193	1.61569		74	77.4952	16	57.3396	814	869.601	14	346.588	222	178.657	2.48563		118	214.394	13	48.4004	94	124.796	59	47.8304	2	28.5423	1.96751
ENSRNOG00000020027		297	181.329	1223	450.81	17	101.823	2	12.1119	0	2.27482	2.17513		7	8.26615	190	644.228	6	7.46897	28	670.071	21	17.6253	2.43061		112	203.584	56	197.059	3	5.25457	1428	1139.16	5	57.0847	2.50573
ENSRNOG00000020279		1276	777.038	7612	2803.94	351	1991.21	1453	5870.24	736	1676.54	3.41893		859	888.612	668	2256.48	268	287.022	3	92.4236	5047	4044.21	3.18005		436	787.311	737	2551.39	236	311.333	2913	2322.96	238	2273.87	3.21732
ENSRNOG00000020386		630	383.955	2415	889.834	126	718.419	352	1425.17	953	2170.17	3.04825		985	1018.8	477	1612.26	1748	1866.18	0	23.1059	6934	5555.99	3.30433		2690	4848.18	245	850.464	6	9.1955	2445	1949.89	102	979.954	3.23743
ENSRNOG00000043377		6	4.25941	3693	1360.53	56	322.44	190	771.125	115	263.879	2.73596		24	25.8317	273	924.18	88	94.9626	70	1640.52	34	28.0403	2.73457		238	430.589	872	3018.11	703	924.804	250	200.091	11	114.169	2.972
ENSRNOG00000020706		126	77.2779	365	134.801	20	118.794	329	1332.31	138	316.199	2.59756		133	138.458	15	53.9667	843	900.544	27	646.965	756	606.472	2.67143		37	68.4618	59	207.43	902	1186.22	117	94.0665	10	104.655	2.52136
ENSRNOG00000020875		16	10.3443	2749	1012.85	14	84.8527	50	205.903	628	1430.86	2.73954		548	567.265	197	667.838	937	1000.84	24	577.647	8	7.21037	2.7514		78	142.328	27	96.8007	3	5.25457	66	53.4106	0	9.51411	1.7886
ENSRNOG00000021182		1303	793.467	5543	2041.9	172	978.634	0	4.0373	28	65.9697	2.89031		831	859.68	129	438.48	2134	2278.04	226	5245.04	2	2.40346	3.24668		360	650.387	40	141.744	737	969.468	11	9.56608	19	190.282	2.59361
ENSRNOG00000018220		1476	898.736	2801	1032	153	871.154	19	80.7461	284	648.323	2.84892		2417	2498.44	247	836.484	74	80.0247	8	207.953	6343	5082.51	3.24082		502	906.218	55	193.601	83	110.346	4312	3438.21	3	38.0565	2.97187
ENSRNOG00000030019		1534	934.028	9462	3485.31	11	67.8821	218	884.17	483	1101.01	3.1121		185	192.188	391	1322.18	1880	2007.02	1	46.2118	4	4.00576	2.85389		502	906.218	17	62.229	2547	3347.16	375	299.737	64	618.417	3.01984
ENSRNOG00000018285		57	35.2923	1351	497.954	39	226.274	862	3484.19	4	11.3741	2.92994		48	50.6302	138	468.836	993	1060.59	0	23.1059	140	112.962	2.53558		144	261.236	255	885.035	3913	5141.6	2803	2235.27	268	2559.3	3.34567
ENSRNOG00000020058		450	274.428	1857	684.318	26	152.735	3	16.1492	184	420.841	2.49093		455	471.171	134	455.344	23	25.6079	98	2287.48	2	2.40346	2.81184		89	162.146	332	1151.24	6	9.1955	2415	1925.97	37	361.536	2.85855
ENSRNOG00000020255		1159	705.845	159	58.9294	131	746.703	53	218.014	208	475.437	2.64442		409	423.64	158	536.294	34	37.3448	0	23.1059	2	2.40346	2.31082		142	257.633	229	795.149	1388	1824.65	390	311.695	209	1997.96	3.01595
ENSRNOG00000011076		8150	4959.78	7123	2623.83	1104	6250.81	87	355.283	3304	7518.27	3.63765		5351	5530.06	1211	4087.98	3096	3304.49	38	901.13	112	90.5301	3.44449		2623	4727.47	1709	5911.76	8	11.8228	6259	4990.31	128	1227.32	3.52811
ENSRNOG00000011053		37	23.1225	22	8.47111	0	5.65684	4	20.1865	3	9.09926	1.12409		8	9.29942	5	20.2375	33	36.2778	3	92.4236	3539	2836.08	2.77733		4	9.00813	2	10.3715	3	5.25457	19	15.9435	17	171.254	1.62702
ENSRNOG00000011669		46	28.5989	38	14.364	4	28.2842	18	76.7088	23	54.5956	1.60757		17	18.5988	6	23.6104	48	52.2828	0	23.1059	30	24.8357	1.45464		22	41.4374	8	31.1145	22	30.2138	214	171.392	40	390.079	2.12335
ENSRNOG00000011294		585	356.573	2882	1061.83	193	1097.43	386	1562.44	271	618.75	2.97285		688	711.922	263	890.451	567	606.053	11	277.271	14	12.0173	2.69857		701	1264.74	249	864.292	124	164.205	454	362.714	35	342.508	2.77793
ENSRNOG00000009990		1927	1173.16	4871	1794.4	276	1566.95	90	367.395	461	1050.96	3.07576		458	474.271	233	789.263	209	224.069	3	92.4236	1435	1150.45	2.73727		1126	2030.43	868	3004.28	32	43.3502	3416	2723.94	129	1236.83	3.25714
ENSRNOG00000030547		270	164.9	39	14.7324	50	288.499	231	936.655	92	211.558	2.50956		377	390.576	170	576.769	5	6.40197	2	69.3177	1144	917.319	2.59337		832	1500.75	841	2910.94	0	1.31364	1284	1024.37	189	1807.68	3.16107
ENSRNOG00000021614		1968	1198.11	937	345.474	112	639.223	140	569.26	1625	3698.85	3.11065		806	833.848	293	991.639	887	947.492	192	4459.44	8	7.21037	3.16075		1617	2915.03	1485	5137.35	6	9.1955	333	266.256	312	2977.92	3.35433
ENSRNOG00000005726		1503	915.165	4640	1709.32	222	1261.48	388	1570.51	26	61.42	3.0428		4092	4229.17	1007	3399.9	4678	4992.47	96	2241.27	1223	980.61	3.50088		1760	3172.66	929	3215.17	0	1.31364	1827	1457.23	357	3406.05	3.35228
ENSRNOG00000052253		8	5.47638	11	4.41971	5	33.9411	11	48.4477	66	152.413	1.68966		3	4.13308	4	16.8646	9	10.67	3	92.4236	50	40.8587	1.51838		41	75.6683	0	3.45717	91	120.855	6	5.58021	8	85.627	1.7652
ENSRNOG00000026319		2085	1269.3	2580	950.605	587	3326.22	13	56.5223	608	1385.36	3.14538		1670	1726.59	200	677.957	1867	1993.15	10	254.165	6	5.60806	2.96918		395	713.444	1198	4145.15	158	208.869	4156	3313.85	75	723.073	3.26028
ENSRNOG00000005512		2619	1594.24	1334	491.692	216	1227.54	258	1045.66	70	161.512	2.95623		363	376.11	439	1484.08	468	500.421	30	716.283	243	195.481	2.81589		2	5.40488	124	432.146	430	566.18	396	316.478	0	9.51411	2.42479
ENSRNOG00000061845		1378	839.104	1082	398.879	215	1221.88	10	44.4104	484	1103.29	2.85824		423	438.106	195	661.092	928	991.239	15	369.694	4104	3288.73	3.06061		438	790.914	11	41.486	404	532.025	262	209.657	81	780.157	2.67288
ENSRNOG00000060430		140	85.7967	152	56.3513	84	480.832	38	157.455	10	25.023	2.20707		67	70.2623	7	26.9834	86	92.8286	4	115.529	74	60.0864	1.86414		234	423.382	22	79.5149	3	5.25457	184	147.477	3	38.0565	2.14219
ENSRNOG00000008393		12	7.91033	1389	511.949	97	554.371	246	997.214	111	254.779	2.66768		816	844.181	248	839.857	1165	1244.12	0	23.1059	8	7.21037	2.7721		557	1005.31	96	335.345	319	420.366	30	24.7124	110	1056.07	2.75462
ENSRNOG00000009571		24	15.2122	66	24.6767	35	203.646	1072	4332.03	64	147.863	2.97529		107	111.593	132	448.598	35	38.4118	441	10212.8	1101	882.869	3.369		3260	5875.1	130	452.889	2	3.94093	699	558.021	0	9.51411	3.13985
ENSRNOG00000042499		679	413.771	1176	433.5	62	356.381	117	476.402	47	109.191	2.5537		5	6.19962	364	1231.12	0	1.067	286	6631.39	260	209.101	3.20838		338	610.751	69	242.002	2329	3060.79	1883	1501.87	30	294.938	3.05769
ENSRNOG00000022448		1353	823.892	3734	1375.63	33	192.333	64	262.425	367	837.132	2.84403		622	643.727	220	745.415	1498	1599.43	140	3257.93	2156	1728.08	3.20274		192	347.714	86	300.774	1346	1769.48	280	224.006	68	656.474	2.81934
ENSRNOG00000013573		62	38.3347	152	56.3513	19	113.137	76	310.872	707	1610.57	2.62926		24	25.8317	15	53.9667	130	139.776	12	300.377	68	55.2795	2.06087		18	34.2309	39	138.287	413	543.848	165	132.331	4	47.5706	2.25347
ENSRNOG00000007472		2691	1638.05	137	50.8266	157	893.781	320	1295.97	1876	4269.83	3.21211		363	376.11	381	1288.46	1726	1842.7	0	23.1059	2	2.40346	2.84915		2597	4680.63	58	203.973	461	606.903	209	167.406	68	656.474	3.10143
ENSRNOG00000030269		5779	3517.06	2975	1096.09	380	2155.26	776	3136.99	11	27.2978	3.2981		5108	5278.97	1103	3723.7	860	918.683	9	231.059	301	241.948	3.31783		1041	1877.29	260	902.321	2222	2920.23	2132	1700.37	310	2958.89	3.31635
ENSRNOG00000010591		620	377.871	876	323.007	38	220.617	611	2470.83	266	607.376	2.90306		172	178.756	39	134.917	10	11.737	4	115.529	1815	1454.89	2.57883		108	196.377	253	878.121	1616	2124.16	3861	3078.68	0	9.51411	3.09946
ENSRNOG00000057090		32	20.0801	55	20.6253	3	22.6274	4	20.1865	36	84.1682	1.52553		6	7.23288	6	23.6104	30	33.0769	1	46.2118	24	20.0288	1.41551		11	21.6195	11	41.486	7	10.5091	18	15.1463	2	28.5423	1.37034
ENSRNOG00000018630		1414	861.009	1393	513.423	106	605.282	164	666.155	195	445.864	2.79123		1107	1144.86	737	2489.22	395	422.53	0	23.1059	2973	2382.63	3.11142		335	605.347	27	96.8007	286	377.015	1224	976.538	67	646.96	2.73282
ENSRNOG00000008766		3579	2178.38	1645	606.237	193	1097.43	345	1396.91	270	616.475	3.07155		1140	1178.96	557	1882.09	1229	1312.4	0	23.1059	2524	2022.91	3.10853		1849	3333.01	359	1244.58	3255	4277.22	3704	2953.53	70	675.502	3.39738
ENSRNOG00000015514		2756	1677.6	37	13.9957	326	1849.79	256	1037.59	777	1769.81	3.10372		356	368.877	612	2067.6	1262	1347.62	99	2310.59	508	407.786	3.11411		212	383.746	717	2482.25	451	593.767	1644	1311.35	82	789.671	3.04617
ENSRNOG00000001842		184	112.57	467	172.369	31	181.019	67	274.537	114	261.604	2.30194		604	625.128	104	354.157	266	284.888	14	346.588	189	152.219	2.54728		88	160.345	25	89.8864	99	131.364	150	120.373	23	228.339	2.16454
ENSRNOG00000036911		1282	780.689	678	250.082	387	2194.86	65	266.462	1018	2318.04	3.06522		1140	1178.96	572	1932.68	0	1.067	2	69.3177	5	4.80691	2.80439		104	189.171	94	328.431	140	185.224	1064	848.99	3	38.0565	2.50239
ENSRNOG00000015396		6312	3841.38	3496	1287.98	1021	5781.3	159	645.969	2012	4579.2	3.50882		5104	5274.84	972	3281.85	718	767.17	175	4066.64	1104	885.273	3.45563		2652	4779.72	15	55.3147	1566	2058.48	2492	1987.35	281	2682.98	3.36413
ENSRNOG00000009139		223	136.301	29	11.0493	1	11.3137	5	24.2238	4	11.3741	1.58942		99	103.327	27	94.4418	67	72.5557	3	92.4236	2	2.40346	1.8635		107	194.576	3	13.8287	4	6.56821	27	22.3209	6	66.5988	1.78375
ENSRNOG00000023393		445	271.385	596	219.88	190	1080.46	25	104.97	58	134.214	2.55893		188	195.288	108	367.648	92	99.2306	4	115.529	69	56.0806	2.22208		314	567.512	33	117.544	52	69.6231	140	112.401	5	57.0847	2.26678
ENSRNOG00000033835		1455	885.957	7992	2943.89	187	1063.49	8	36.3357	1835	4176.56	3.26037		1039	1074.6	200	677.957	1048	1119.28	49	1155.29	376	302.034	2.93743		940	1695.33	278	964.55	31	42.0366	3351	2672.13	380	3624.88	3.25522
ENSRNOG00000013442		244	149.079	3977	1465.13	27	158.392	274	1110.26	51	118.29	2.77832		73	76.4619	88	300.19	993	1060.59	125	2911.34	233	187.47	2.95771		405	731.46	132	459.803	1848	2428.93	334	267.053	34	332.994	2.92637
ENSRNOG00000015420		787	479.488	4215	1552.79	334	1895.04	195	791.312	422	962.247	3.05545		1236	1278.15	219	742.042	965	1030.72	64	1501.88	373	299.631	2.98699		126	228.807	437	1514.24	2	3.94093	580	463.158	212	2026.51	2.92805
ENSRNOG00000018901		197	120.48	13	5.15633	5	33.9411	5	24.2238	34	79.6186	1.72168		129	134.325	281	951.163	1121	1197.17	2	69.3177	6	5.60806	2.6735		59	108.098	20	72.6006	1706	2242.39	1371	1093.72	18	180.768	2.86895
ENSRNOG00000009402		227	138.735	36	13.6274	50	288.499	3	16.1492	414	944.049	2.44749		53	55.7965	20	70.8313	33	36.2778	179	4159.06	10	8.81267	2.9376		35	64.8586	2	10.3715	5614	7376.1	1747	1393.46	0	9.51411	3.24818
ENSRNOG00000010526		242	147.862	113	41.9872	4	28.2842	66	270.499	23	54.5956	2.03601		11	12.3992	9	33.7292	84	90.6946	11	277.271	71	57.6829	1.97477		18	34.2309	121	421.775	40	53.8594	2	2.39152	1	19.0282	2.02636
ENSRNOG00000014272		349	212.971	302	111.598	60	345.068	728	2943.2	299	682.445	2.93402		513	531.1	72	246.223	1798	1919.53	155	3604.52	116	93.7348	3.10688		17	32.4293	3	13.8287	29	39.4093	1166	930.302	48	466.192	2.47193
ENSRNOG00000004680		1541	938.287	1243	458.176	303	1719.68	505	2042.88	1613	3671.55	3.24702		2330	2408.55	330	1116.44	544	581.513	0	23.1059	70	56.8818	2.92288		110	199.981	730	2527.19	68	90.6413	1618	1290.62	7	76.1129	2.92268
ENSRNOG00000005018		1041	634.044	7691	2833.03	369	2093.03	356	1441.32	2720	6189.77	3.42131		1225	1266.79	280	947.791	97	104.566	0	23.1059	169	136.196	2.69521		701	1264.74	198	687.977	1434	1885.08	1662	1325.7	87	837.242	3.07923
ENSRNOG00000007673		2319	1411.69	11199	4125.06	4	28.2842	1051	4247.24	653	1487.73	3.35411		615	636.494	1118	3774.3	1946	2077.44	0	23.1059	4100	3285.52	3.29212		1716	3093.39	826	2859.08	4	6.56821	26	21.5237	210	2007.48	3.20347
ENSRNOG00000009781		1009	614.572	3863	1423.15	82	469.518	16	68.6342	293	668.796	2.8122		1391	1438.31	317	1072.59	1129	1205.71	20	485.224	658	527.959	2.97587		63	115.304	95	331.888	536	705.426	0	0.797174	110	1056.07	2.64532
ENSRNOG00000001596		382	233.051	1476	543.992	169	961.664	235	952.804	148	338.948	2.78254		623	644.76	440	1487.46	773	825.855	0	23.1059	28	23.2334	2.77879		515	929.639	68	238.545	2743	3604.64	62	50.2219	76	732.587	3.04576
ENSRNOG00000007518		1098	668.727	1901	700.524	86	492.145	18	76.7088	231	527.757	2.693		839	867.946	54	185.511	589	629.527	248	5753.37	5	4.80691	3.17267		1384	2495.25	46	162.487	1104	1451.58	1321	1053.86	36	352.022	3.04259
ENSRNOG00000007241		1633	994.268	2275	838.271	50	288.499	3	16.1492	802	1826.68	2.89915		857	886.545	262	887.078	14	16.0049	0	23.1059	1172	939.751	2.74075		295	533.281	279	968.007	66	88.0141	449	358.728	193	1845.74	2.8801
ENSRNOG00000058658		3	2.43395	20	7.73449	76	435.577	387	1566.47	619	1410.39	2.83539		492	509.402	128	435.107	783	836.525	0	23.1059	3	3.20461	2.55807		5	10.8098	27	96.8007	433	570.121	1124	896.82	27	266.395	2.56607
ENSRNOG00000016067		826	503.219	370	136.643	82	469.518	118	480.439	432	984.995	2.71178		526	544.533	70	239.477	326	348.908	0	23.1059	4	4.00576	2.3655		41	75.6683	264	916.15	5	7.88186	891	711.079	53	513.762	2.64827
ENSRNOG00000047466		5072	3086.86	31	11.7859	225	1278.45	941	3803.14	745	1697.01	3.29567		1106	1143.83	547	1848.36	9	10.67	0	23.1059	11	9.61382	2.78327		710	1280.96	281	974.922	2956	3884.44	2152	1716.31	36	352.022	3.2153
ENSRNOG00000026787		1413	860.401	2905	1070.31	356	2019.49	39	161.492	1532	3487.29	3.18179		986	1019.84	421	1423.37	2732	2916.1	2	69.3177	37	30.4438	3.03815		723	1304.38	6	24.2002	1540	2024.32	21	17.5378	22	218.825	2.85604
ENSRNOG00000005183		785	478.271	446	164.634	74	424.263	448	1812.75	37	86.443	2.77325		454	470.137	40	138.29	3	4.26798	0	23.1059	35	28.8415	2.12362		467	843.161	583	2018.99	167	220.692	9	7.97174	8	85.627	2.80297
ENSRNOG00000014230		1831	1114.75	6994	2576.32	750	4248.29	176	714.603	708	1612.84	3.31247		903	934.075	1224	4131.83	209	224.069	17	415.906	5863	4697.95	3.31822		605	1091.79	158	549.69	1831	2406.59	4	3.98587	12	123.683	2.92176
ENSRNOG00000012638		72	44.4196	198	73.2935	22	130.107	52	213.977	594	1353.52	2.55998		17	18.5988	1	6.74584	335	358.511	7	184.847	288	231.533	2.20425		23	43.239	10	38.0289	268	353.37	151	121.17	3	38.0565	2.07472
ENSRNOG00000021269		6054	3684.39	3215	1184.48	701	3971.1	1443	5829.87	1168	2659.26	3.53981		10971	11337	5109	17235.6	3517	3753.69	282	6538.97	757	607.273	3.89733		3226	5813.85	2098	7256.6	7820	10274	13967	11134.9	292	2787.64	3.87235
ENSRNOG00000006037		2503	1523.65	2193	808.07	201	1142.68	908	3669.91	1897	4317.6	3.36029		1917	1981.81	1268	4280.24	2186	2333.52	142	3304.14	234	188.271	3.38338		3237	5833.67	256	888.492	1334	1753.71	2944	2347.68	116	1113.15	3.37791
ENSRNOG00000005438		193	118.047	1890	696.472	19	113.137	1014	4097.86	210	479.986	3.04183		179	185.988	484	1635.87	674	720.222	5	138.635	51	41.6599	2.73598		1386	2498.86	84	293.859	1	2.62729	771	615.418	224	2140.68	3.04544
ENSRNOG00000005195		924	562.851	21	8.1028	343	1945.95	1176	4751.91	128	293.451	3.17968		1002	1036.37	1110	3747.31	61	66.1537	0	23.1059	19	16.023	2.99025		165	299.07	339	1175.44	4021	5283.47	1059	845.004	133	1274.89	3.24934
ENSRNOG00000005276		792	482.53	556	205.148	4	28.2842	28	117.082	198	452.688	2.41018		267	276.916	153	519.43	104	112.035	3	92.4236	1753	1405.22	2.68233		761	1372.84	307	1064.81	16	22.3319	162	129.939	24	237.853	2.75247
ENSRNOG00000015696		52	32.2498	120	44.5654	5	33.9411	172	698.454	20	47.7711	2.234		43	45.4638	5	20.2375	36	39.4788	8	207.953	141	113.764	1.93135		8	16.2146	6	24.2002	33	44.6639	6	5.58021	36	352.022	1.94712
ENSRNOG00000024923		738	449.672	9305	3427.48	4	28.2842	86	351.246	1602	3646.53	3.19883		171	177.722	109	371.021	2149	2294.04	33	785.6	4999	4005.76	3.18379		319	576.52	63	221.259	3613	4747.5	383	306.115	3	38.0565	3.07111
ENSRNOG00000036802		61534	37443.3	109036	40159.3	3020	17089.3	1879	7590.13	7880	17927.8	4.38097		16077	16612.9	4250	14338.3	13175	14058.7	849	19640	19654	15746.6	4.20627		13839	24934.5	7779	26896.8	188	248.278	12094	9641.81	2337	22244	4.22513
ENSRNOG00000016744		4654	2832.51	5187	1910.79	430	2438.1	143	581.372	792	1803.93	3.28179		1950	2015.91	989	3339.19	3234	3451.73	82	1917.79	0	0.801152	3.33144		4990	8991.92	932	3225.54	1842	2421.04	184	147.477	114	1094.12	3.50188
ENSRNOG00000010945		1331	810.505	5575	2053.69	457	2590.83	33	137.268	490	1116.93	3.1277		2148	2220.5	1116	3767.55	105	113.102	161	3743.15	2	2.40346	3.29432		283	511.662	312	1082.09	3329	4374.43	1298	1035.53	177	1693.51	3.24041
ENSRNOG00000005281		1052	640.737	2601	958.34	0	5.65684	4	20.1865	1143	2602.39	2.92709		1162	1201.69	91	310.309	119	128.039	3	92.4236	65	52.876	2.55275		321	580.124	845	2924.77	27	36.782	39	31.8869	236	2254.85	3.06658
ENSRNOG00000047374		2646	1610.67	3320	1223.15	495	2805.79	1753	7081.43	1118	2545.52	3.48477		1450	1499.27	759	2563.42	2790	2977.98	192	4459.44	62	50.4726	3.36363		395	713.444	23	82.9721	3147	4135.35	4504	3591.27	267	2549.78	3.34529
ENSRNOG00000009936		433	264.083	291	107.546	207	1176.62	21	88.8207	448	1021.39	2.72566		532	550.732	65	222.613	444	474.813	3	92.4236	43	35.2507	2.4396		620	1118.81	50	176.316	138	182.596	779	621.795	25	247.367	2.67152
ENSRNOG00000013657		5539	3371.02	10977	4043.3	274	1555.63	1284	5187.94	332	757.514	3.47466		3193	3300.26	1866	6297.24	341	364.912	187	4343.91	6364	5099.33	3.58896		1104	1990.8	1155	3996.49	13643	17923.3	6280	5007.05	221	2112.13	3.79281
ENSRNOG00000008782		2736	1665.43	3176	1170.12	609	3450.68	8	36.3357	1426	3246.16	3.28188		1482	1532.34	112	381.14	1485	1585.56	1	46.2118	7	6.40921	2.85146		1123	2025.03	772	2672.39	436	574.062	8956	7140.28	179	1712.54	3.451
ENSRNOG00000023309		75	46.245	4555	1678.02	26	152.735	222	900.319	209	477.711	2.81358		24	25.8317	1	6.74584	580	619.924	6	161.741	93	75.3083	2.2502		49	90.0813	103	359.546	208	274.551	270	216.034	13	133.198	2.3318
ENSRNOG00000043262		163	99.7919	584	215.461	34	197.99	156	633.857	140	320.749	2.46771		98	102.294	35	121.425	453	484.416	26	623.859	499	400.576	2.53972		41	75.6683	42	148.658	779	1024.64	384	306.912	17	171.254	2.53836
ENSRNOG00000058179		168	102.834	358	132.223	54	311.126	107	436.029	166	379.894	2.43524		146	151.891	23	80.9501	1582	1689.05	147	3419.67	1197	959.78	3.10046		92	167.551	129	449.432	485	638.43	248	198.496	33	323.48	2.55081
ENSRNOG00000009795		2362	1437.86	1003	369.782	117	667.508	16	68.6342	228	520.933	2.78742		866	895.844	155	526.176	4516	4819.62	1	46.2118	211	169.844	3.11111		2274	4098.7	295	1023.32	111	147.128	1229	980.523	159	1522.26	3.19156
ENSRNOG00000006966		61	37.7262	13	5.15633	36	209.303	92	375.469	3	9.09926	2.105		152	158.09	9	33.7292	33	36.2778	0	23.1059	5	4.80691	1.70929		80	145.932	4	17.2858	382	503.125	48	39.0615	86	827.728	2.48661
ENSRNOG00000061397		2	1.82546	198	73.2935	39	226.274	73	298.761	80	184.26	2.19557		15	16.5323	2	10.1188	272	291.29	57	1340.14	349	280.403	2.58849		11	21.6195	43	152.115	150	198.36	69	55.8021	9	95.1411	2.01956
ENSRNOG00000012550		1161	707.062	840	309.748	23	135.764	23	96.8953	527	1201.1	2.6903		704	728.455	480	1622.37	1056	1127.81	0	23.1059	14	12.0173	2.8468		106	192.774	31	110.629	438	576.689	889	709.484	44	428.135	2.60589
ENSRNOG00000058476		939	571.978	1499	552.463	376	2132.63	9	40.373	942	2145.15	3.03684		63	66.1292	180	610.499	1185	1265.46	0	23.1059	2489	1994.87	2.89873		53	97.2878	551	1908.36	246	324.47	37	30.2926	117	1122.67	2.84299
ENSRNOG00000054626		175	107.094	2191	807.333	96	548.714	15	64.5969	472	1075.99	2.71663		47	49.5969	33	114.679	160	171.786	234	5429.89	521	418.201	3.09231		10	19.8179	16	58.7719	15	21.0183	977	779.636	63	608.903	2.47368
ENSRNOG00000009341		796	484.964	643	237.191	25	147.078	556	2248.78	197	450.414	2.85351		139	144.658	171	580.142	574	613.522	0	23.1059	2	2.40346	2.43579		326	589.132	63	221.259	3	5.25457	1783	1422.16	98	941.897	2.80342
ENSRNOG00000016047		5652	3439.78	4914	1810.24	496	2811.45	484	1958.09	4028	9165.23	3.58399		6980	7213.25	1452	4900.85	2922	3118.83	1179	27265	3788	3035.56	3.95936		4921	8867.61	1672	5783.84	94	124.796	5593	4459.39	126	1208.29	3.61159
ENSRNOG00000050044		1887	1148.82	835	307.906	125	712.762	72	294.723	6	15.9237	2.69551		130	135.358	288	974.774	6	7.46897	0	23.1059	805	645.728	2.55302		110	199.981	5	20.743	3940	5177.07	1914	1526.59	57	551.819	3.17471
ENSRNOG00000014375		167	102.226	3000	1105.3	147	837.213	663	2680.77	50	116.016	2.98601		269	278.983	43	148.408	371	396.922	35	831.812	21	17.6253	2.52472		454	819.74	60	210.887	0	1.31364	1543	1230.84	64	618.417	2.7606
ENSRNOG00000012989		208	127.174	190	70.347	154	876.811	6	28.2611	210	479.986	2.5004		2	3.09981	132	448.598	23	25.6079	2	69.3177	211	169.844	2.15623		63	115.304	21	76.0577	2	3.94093	1355	1080.97	12	123.683	2.44714
ENSRNOG00000012219		107	65.7166	536	197.782	8	50.9116	199	807.461	48	111.466	2.39211		62	65.096	22	77.5772	727	776.773	12	300.377	261	209.902	2.45628		13	25.2228	295	1023.32	223	294.256	77	62.1795	3	38.0565	2.46031
ENSRNOG00000010910		531	323.715	15	5.89294	41	237.587	6	28.2611	212	484.536	2.33445		6	7.23288	52	178.765	24	26.6749	0	23.1059	11	9.61382	1.69089		124	225.203	8	31.1145	4	6.56821	58	47.0332	120	1151.21	2.46572
ENSRNOG00000006137		1681	1023.48	43	16.2056	230	1306.73	547	2212.44	574	1308.02	3.06944		509	526.967	17	60.7126	75	81.0917	0	23.1059	1454	1165.68	2.56997		381	688.221	8	31.1145	2	3.94093	803	640.928	8	85.627	2.46235
ENSRNOG00000017309		2340	1424.47	253	93.5505	118	673.164	16	68.6342	372	848.506	2.79356		307	318.247	164	556.532	874	933.621	48	1132.19	5	4.80691	2.77017		2017	3635.68	240	833.178	454	597.707	3369	2686.47	0	9.51411	3.19103
ENSRNOG00000018194		1585	965.061	946	348.789	85	486.489	700	2830.15	482	1098.74	3.05913		962	995.038	49	168.646	1161	1239.85	124	2888.24	1183	948.564	3.09624		954	1720.55	56	197.059	1	2.62729	71	57.3965	43	418.621	2.68056
ENSRNOG00000014368		2013	1225.49	6639	2445.57	180	1023.89	130	528.887	96	220.657	3.03699		957	989.872	150	509.311	38	41.6128	89	2079.53	13	11.2161	2.86112		152	275.649	207	719.091	1	2.62729	101	81.3117	206	1969.42	2.78506
ENSRNOG00000018183		2145	1305.81	10869	4003.52	125	712.762	7	32.2984	458	1044.14	3.1522		1568	1621.2	217	735.297	469	501.488	111	2587.86	1330	1066.33	3.11476		1294	2333.11	72	252.373	58	77.5049	1699	1355.2	52	504.248	2.9564
ENSRNOG00000061876		170	104.051	502	185.259	10	62.2253	182	738.827	61	141.039	2.39143		65	68.1958	22	77.5772	366	391.587	49	1155.29	591	474.282	2.63688		14	27.0244	81	283.488	520	684.408	652	520.554	21	209.311	2.53776
ENSRNOG00000023346		8	5.47638	364	134.433	4	28.2842	178	722.678	10	25.023	2.26288		6	7.23288	5	20.2375	50	54.4168	0	23.1059	21	17.6253	1.38959		16	30.6277	8	31.1145	73	97.2096	39	31.8869	3	38.0565	1.66067
ENSRNOG00000033556		1442	878.047	86	32.0429	618	3501.59	635	2567.73	202	461.788	3.17267		1338	1383.55	382	1291.83	949	1013.65	7	184.847	65	52.876	2.89506		1463	2637.58	611	2115.79	19	26.2729	5700	4544.69	34	332.994	3.28589
ENSRNOG00000016443		805	490.441	103	38.3041	137	780.645	2	12.1119	324	739.315	2.61507		925	956.807	236	799.382	42	45.8808	0	23.1059	95	76.9106	2.58026		863	1556.61	9	34.5717	129	170.774	127	102.038	137	1312.95	2.80304
ENSRNOG00000009409		42	26.1649	3849	1417.99	218	1238.85	100	407.768	2	6.82445	2.79205		615	636.494	505	1706.7	183	196.327	156	3627.63	31	25.6369	3.09292		707	1275.55	1	6.91434	230	303.451	18	15.1463	57	551.819	2.63405
ENSRNOG00000057626		10399	6328.27	12374	4557.82	865	4898.83	990	4000.97	463	1055.51	3.61996		6586	6806.14	935	3157.05	853	911.214	3	92.4236	3	3.20461	3.34124		4013	7231.73	351	1216.92	4782	6283.15	6723	5360.19	299	2854.23	3.66174
ENSRNOG00000014986		119	73.0185	3183	1172.7	54	311.126	3	16.1492	158	361.696	2.58764		427	442.239	72	246.223	193	206.997	23	554.541	2	2.40346	2.46312		5	10.8098	551	1908.36	1	2.62729	1815	1447.67	12	123.683	2.84425
ENSRNOG00000045913		70	43.2026	86	32.0429	7	45.2548	17	72.6715	18	43.2215	1.67466		29	30.9981	10	37.1021	69	74.6897	2	69.3177	31	25.6369	1.67714		24	45.0407	9	34.5717	22	30.2138	30	24.7124	2	28.5423	1.51343
ENSRNOG00000003858		24	15.2122	45	16.9422	70	401.636	165	670.193	125	286.627	2.44424		1008	1042.57	124	421.615	326	348.908	4	115.529	1347	1079.95	2.77939		630	1136.83	47	165.944	0	1.31364	13	11.1604	22	218.825	2.48687
ENSRNOG00000061262		4708	2865.37	4538	1671.75	260	1476.44	686	2773.63	832	1894.92	3.32969		2576	2662.73	482	1629.12	1396	1490.59	8	207.953	379	304.438	3.10001		939	1693.53	1790	6191.79	370	487.361	5834	4651.51	194	1855.25	3.47362
ENSRNOG00000007733		3200	1947.77	1873	690.211	178	1012.58	3	16.1492	255	582.353	2.92932		1276	1319.48	255	863.468	7	8.53596	0	23.1059	1486	1191.31	2.83326		895	1614.26	87	304.231	189	249.592	1000	797.971	200	1912.34	2.98931
ENSRNOG00000003359		2428	1478.02	2279	839.744	20	118.794	0	4.0373	2040	4642.9	3.15128		195	202.521	94	320.427	726	775.706	166	3858.68	3408	2731.13	3.19802		1566	2823.15	607	2101.96	5	7.88186	3221	2568.49	111	1065.58	3.23386
ENSRNOG00000056703		1349	821.458	655	241.611	145	825.899	78	318.947	20	47.7711	2.65431		193	200.454	369	1247.98	90	97.0966	2	69.3177	1297	1039.89	2.72505		619	1117.01	505	1749.33	351	462.402	3972	3167.17	23	228.339	3.12867
ENSRNOG00000049985		80	49.2875	926	341.422	8	50.9116	53	218.014	36	84.1682	2.17249		2	3.09981	51	175.392	280	299.826	176	4089.74	90	72.9048	2.96764		177	320.69	46	162.487	16	22.3319	2361	1882.92	1	19.0282	2.68259
ENSRNOG00000007682		1410	858.575	4193	1544.69	100	571.341	138	561.185	0	2.27482	2.8498		14	15.499	56	192.256	9	10.67	3	92.4236	27	22.4322	1.82384		215	389.151	130	452.889	2422	3182.96	3977	3171.16	67	646.96	3.19552
ENSRNOG00000054352		229	139.952	149	55.2463	5	33.9411	14	60.5596	9	22.7482	1.79581		516	534.2	57	195.629	2	3.20099	14	346.588	7	6.40921	2.33687		182	329.698	13	48.4004	87	115.601	2485	1981.77	3	38.0565	2.70131
ENSRNOG00000055648		515	313.979	786	289.859	11	67.8821	543	2196.29	67	154.687	2.78143		55	57.8631	53	182.138	810	865.333	23	554.541	203	163.435	2.56189		27	50.4455	186	646.491	584	768.481	225	180.161	42	409.107	2.61378
ENSRNOG00000005124		232	141.778	28	10.681	46	265.872	1	8.07461	10	25.023	1.95562		9	10.3327	71	242.85	40	43.7468	228	5291.25	11730	9398.31	3.47673		47	86.4781	39	138.287	11	15.7637	18	15.1463	9	95.1411	1.84611
ENSRNOG00000050220		1335	812.939	1210	446.022	220	1250.16	298	1207.15	1078	2454.53	3.09137		1616	1670.8	796	2688.22	601	642.331	69	1617.41	143	115.366	3.12931		385	695.428	373	1292.98	1372	1803.63	3270	2607.55	239	2283.39	3.2397
ENSRNOG00000026884		277	169.159	5	2.20985	35	203.646	360	1457.47	15	36.3971	2.57261		8	9.29942	189	640.855	78	84.2927	3	92.4236	91	73.706	2.25555		22	41.4374	22	79.5149	87	115.601	75	60.5852	27	266.395	2.05195
ENSRNOG00000007923		39	24.3395	89	33.1478	7	45.2548	42	173.604	51	118.29	1.89723		19	20.6654	5	20.2375	423	452.406	1	46.2118	501	402.178	2.27494		17	32.4293	45	159.03	152	200.987	37	30.2926	4	47.5706	1.97341
ENSRNOG00000012686		1568	954.716	18831	6935.99	519	2941.56	3991	16116.9	559	1273.9	3.75163		1205	1246.12	448	1514.44	15785	16843.6	521	12061.3	15160	12146.3	3.94262		384	693.626	725	2509.9	19408	25496.5	8896	7092.45	260	2483.18	3.88395
ENSRNOG00000003988		15	9.73579	13	5.15633	36	209.303	36	149.38	60	138.764	2.01059		28	29.9648	43	148.408	272	291.29	11	277.271	688	551.994	2.41461		4	9.00813	14	51.8575	232	306.079	437	349.162	4	47.5706	2.18394
ENSRNOG00000006180		1294	787.991	1447	533.311	25	147.078	3	16.1492	1080	2459.08	2.89692		137	142.591	82	279.952	10	11.737	24	577.647	5	4.80691	2.30824		180	326.094	94	328.431	1632	2145.18	467	373.077	8	85.627	2.81404
ENSRNOG00000004667		24	15.2122	45	16.9422	3	22.6274	6	28.2611	11	27.2978	1.34377		16	17.5656	3	13.4917	29	32.0099	2	69.3177	23	19.2276	1.48176		1	3.60325	5	20.743	388	511.007	17	14.3491	2	28.5423	2.06314
ENSRNOG00000024503		543	331.017	11	4.41971	170	967.32	2	12.1119	4	11.3741	2.42365		9	10.3327	22	77.5772	8	9.60296	0	23.1059	10	8.81267	1.41307		2123	3826.65	22	79.5149	11	15.7637	3	3.18869	19	190.282	2.91544
ENSRNOG00000004496		7159	4356.77	6928	2552.01	243	1380.27	943	3811.22	413	941.774	3.41638		1555	1607.77	481	1625.75	561	599.652	487	11275.7	8007	6415.62	3.63396		2520	4541.9	1459	5047.47	10	14.4501	3109	2479.21	36	352.022	3.39568
ENSRNOG00000004269		2378	1447.59	724	267.024	255	1448.15	430	1740.08	585	1333.04	3.09593		868	897.911	1054	3558.43	1868	1994.21	0	23.1059	9004	7214.37	3.43737		3191	5750.79	1003	3471	2357	3097.57	405	323.652	514	4899.77	3.54513
ENSRNOG00000004067		1169	711.93	3004	1106.77	117	667.508	107	436.029	29	68.2445	2.77677		764	790.451	1058	3571.92	119	128.039	0	23.1059	2093	1677.61	3.0928		1176	2120.51	3	13.8287	3	5.25457	1322	1054.66	26	256.881	2.83899
ENSRNOG00000004061		6783	4127.98	10408	3833.73	441	2500.33	175	710.566	2051	4667.92	3.5008		1043	1078.73	790	2667.98	1030	1100.07	0	23.1059	5289	4238.09	3.26045		1829	3296.98	1125	3892.77	203	267.983	4381	3493.21	218	2083.59	3.41613
ENSRNOG00000004196		7	4.8679	1706	628.703	16	96.1664	96	391.619	60	138.764	2.40144		246	255.217	80	273.207	0	1.067	6	161.741	29	24.0346	2.1555		5	10.8098	3	13.8287	197	260.101	861	687.164	5	57.0847	2.31344
ENSRNOG00000007031		2139	1302.16	349	128.908	6	39.5979	20	84.7834	737	1678.81	2.81081		443	458.772	204	691.449	1244	1328.41	0	23.1059	8337	6680	3.26395		1362	2455.62	101	352.631	100	132.678	423	338.002	209	1997.96	3.02341
ENSRNOG00000026239		63	38.9432	989	364.626	13	79.1958	99	403.73	228	520.933	2.44946		212	220.086	460	1554.92	1014	1083	4	115.529	2777	2225.6	3.01696		173	313.483	1	6.91434	3	5.25457	346	276.619	85	818.214	2.45347
ENSRNOG00000005045		432	263.475	28	10.681	42	243.244	18	76.7088	33	77.3437	2.12805		280	290.349	200	677.957	33	36.2778	0	23.1059	2396	1920.36	2.77056		79	144.13	57	200.516	8	11.8228	441	352.351	2	28.5423	2.16871
ENSRNOG00000005323		7	4.8679	7	2.94647	15	90.5095	0	4.0373	520	1185.18	2.41079		2	3.09981	20	70.8313	44	48.0148	4	115.529	6	5.60806	1.68679		12	23.4211	77	269.659	16	22.3319	40	32.6841	6	66.5988	1.91876
ENSRNOG00000007364		3400	2069.46	2345	864.053	27	158.392	110	448.141	216	493.635	2.90673		408	422.607	456	1541.42	360	385.185	0	23.1059	362	290.818	2.72642		209	378.342	165	573.89	884	1162.57	1313	1047.49	151	1446.15	2.96458
ENSRNOG00000028366		1093	665.685	25	9.57603	12	73.539	8	36.3357	144	329.848	2.3483		16	17.5656	16	57.3396	247	264.615	17	415.906	6269	5023.22	3.06286		297	536.885	15	55.3147	6	9.1955	91	73.34	10	104.655	2.19278
ENSRNOG00000056756		369	225.14	94	34.9893	13	79.1958	79	322.984	109	250.23	2.26128		237	245.918	12	43.848	195	209.131	34	808.706	51	41.6599	2.43113		30	55.8504	16	58.7719	186	245.651	81	65.3682	9	95.1411	2.01769
ENSRNOG00000007459		426	259.824	2471	910.46	156	888.125	12	52.485	720	1640.14	2.87518		120	125.026	405	1369.41	75	81.0917	2	69.3177	6181	4952.72	3.12041		1679	3026.73	10	38.0289	2	3.94093	1911	1524.2	188	1798.17	3.1066
ENSRNOG00000010653		386	235.485	6	2.57816	168	956.007	0	4.0373	365	832.583	2.60867		13	14.4658	21	74.2042	4	5.33498	5	138.635	7	6.40921	1.67952		21	39.6358	14	51.8575	4	6.56821	4	3.98587	42	409.107	2.00958
ENSRNOG00000003951		404	246.437	669	246.767	16	96.1664	49	201.865	32	75.0689	2.2387		19	20.6654	92	313.682	525	561.24	0	23.1059	3	3.20461	2.26571		587	1059.36	57	200.516	68	90.6413	3196	2548.56	6	66.5988	2.89935
ENSRNOG00000004060		7107	4325.13	21246	7825.46	1703	9639.26	5399	21801.4	2987	6797.15	4.00336		6797	7024.16	7054	23796	3516	3752.62	994	22990.4	1687	1352.34	4.07126		4610	8307.3	1707	5904.84	14320	18812.7	7765	6190.85	1179	11226.7	4.00383
ENSRNOG00000005470		62	38.3347	102	37.9358	210	1193.59	7	32.2984	19	45.4963	2.43061		67	70.2623	129	438.48	1889	2016.62	0	23.1059	23	19.2276	2.71057		17	32.4293	11	41.486	18	24.9592	34	27.9011	6	66.5988	1.58743
ENSRNOG00000041744		149	91.2731	992	365.731	99	565.684	25	104.97	428	975.896	2.62398		247	256.251	103	350.784	191	204.863	41	970.448	1070	858.034	2.7227		195	353.119	303	1050.98	0	1.31364	88	70.9484	7	76.1129	2.49205
ENSRNOG00000010872		1656	1008.26	7364	2712.6	116	661.851	494	1998.47	954	2172.45	3.23318		1191	1231.66	866	2924.32	125	134.441	129	3003.77	8153	6532.59	3.44175		232	419.779	334	1158.15	4536	5960	7277	5801.83	45	437.649	3.4402
ENSRNOG00000037486		39	24.3395	52	19.5204	7	45.2548	18	76.7088	26	61.42	1.65752		33	35.1312	2	10.1188	78	84.2927	0	23.1059	53	43.2622	1.59309		15	28.826	12	44.9432	13	18.391	41	33.4813	3	38.0565	1.51507
ENSRNOG00000002840		253	154.556	1050	387.093	305	1730.99	64	262.425	226	516.383	2.78554		409	423.64	182	617.244	1385	1478.86	1	46.2118	340	273.193	2.75422		175	317.086	84	293.859	34	45.9775	1139	908.778	31	304.452	2.57291
ENSRNOG00000032441		154	94.3155	603	222.459	12	73.539	195	791.312	837	1906.3	2.7907		108	112.626	69	236.104	2415	2577.86	49	1155.29	1024	821.181	2.9915		18	34.2309	29	103.715	655	861.75	365	291.766	71	685.016	2.59692
ENSRNOG00000030597		504	307.286	1469	541.414	12	73.539	9	40.373	65	150.138	2.34743		435	450.505	8	30.3563	39	42.6798	0	23.1059	251	201.89	2.17524		540	974.68	8	31.1145	30	40.7229	27	22.3209	72	694.53	2.54737
ENSRNOG00000031135		1033	629.176	3799	1399.57	64	367.695	333	1348.46	434	989.545	2.9763		312	323.413	187	634.109	326	348.908	2	69.3177	158	127.383	2.47803		521	940.449	61	214.344	21	28.9001	719	573.965	0	9.51411	2.54831
ENSRNOG00000042233		1110	676.029	1139	419.872	145	825.899	6	28.2611	207	473.162	2.68542		246	255.217	281	951.163	964	1029.65	171	3974.21	13	11.2161	3.09492		181	327.896	0	3.45717	300	395.406	740	590.706	30	294.938	2.5085
ENSRNOG00000004695		7604	4627.54	11908	4386.19	709	4016.36	34	141.306	1334	3036.88	3.51077		1696	1753.46	498	1683.09	952	1016.85	369	8549.18	1229	985.417	3.44679		2285	4118.52	626	2167.65	1	2.62729	3091	2464.86	400	3815.16	3.40032
ENSRNOG00000020266		1567	954.108	51	19.1521	117	667.508	170	690.379	144	329.848	2.72607		332	344.079	566	1912.45	1495	1596.23	29	693.177	2303	1845.85	3.10665		783	1412.48	121	421.775	1570	2063.73	815	650.494	119	1141.69	3.05616
ENSRNOG00000057881		514	313.371	1519	559.83	12	73.539	44	181.679	67	154.687	2.40929		10	11.366	202	684.703	2122	2265.23	0	23.1059	1753	1405.22	2.94346		93	169.353	1238	4283.43	147	194.419	2267	1807.99	50	485.22	3.14242
ENSRNOG00000019552		626	381.521	1452	535.153	53	305.47	71	290.686	370	843.957	2.67335		163	169.456	27	94.4418	726	775.706	1	46.2118	1626	1303.47	2.6793		6	12.6114	25	89.8864	4658	6120.26	373	298.143	49	475.706	3.14592
ENSRNOG00000019459		1024	623.699	2297	846.374	121	690.135	353	1429.21	837	1906.3	3.04105		593	613.762	193	654.347	42	45.8808	252	5845.79	4690	3758.2	3.33917		339	612.553	256	888.492	3829	5031.25	3717	2963.89	59	570.847	3.30393
ENSRNOG00000033791		189	115.613	4	1.84154	2	16.9705	146	593.484	44	102.367	2.22025		660	682.991	45	155.154	2558	2730.44	76	1779.15	11	9.61382	3.02998		977	1761.99	37	131.372	95	126.11	2	2.39152	89	856.27	2.76014
ENSRNOG00000014287		236	144.211	271	100.18	90	514.773	25	104.97	55	127.39	2.29733		174	180.822	95	323.8	13	14.9379	7	184.847	738	592.051	2.41379		1343	2421.39	316	1095.92	1	2.62729	152	121.968	5	57.0847	2.86911
ENSRNOG00000004148		365	222.706	50	18.7838	5	33.9411	10	44.4104	688	1567.35	2.57685		28	29.9648	5	20.2375	26	28.8089	1	46.2118	17	14.4207	1.44605		4	9.00813	9	34.5717	13	18.391	79	63.7739	2	28.5423	1.48936
ENSRNOG00000021881		1608	979.056	938	345.842	88	503.459	2	12.1119	354	807.56	2.72395		311	322.38	92	313.682	15	17.0719	0	23.1059	13	11.2161	2.13827		611	1102.6	57	200.516	19	26.2729	153	122.765	31	304.452	2.5457
ENSRNOG00000056458		502	306.069	682	251.555	1	11.3137	4	20.1865	874	1990.46	2.71258		86	89.8944	137	465.463	4118	4394.95	47	1109.08	127	102.547	3.09075		196	354.92	373	1292.98	7	10.5091	10	8.76891	14	142.712	2.55868
ENSRNOG00000004026		5350	3256.01	12185	4488.21	760	4304.86	657	2656.55	419	955.423	3.49585		2279	2355.85	724	2445.37	176	188.858	3	92.4236	213	171.446	3.02152		3276	5903.93	1628	5631.73	17	23.6456	1943	1549.71	424	4043.5	3.53536
ENSRNOG00000061159		650	396.125	1693	623.915	80	458.204	18	76.7088	9	22.7482	2.49905		303	314.114	51	175.392	343	367.046	14	346.588	20	16.8242	2.38738		409	738.667	144	501.29	217	286.374	82	66.1654	0	9.51411	2.5057
ENSRNOG00000059744		72	44.4196	9	3.68309	9	56.5684	2	12.1119	47	109.191	1.65509		3	4.13308	16	57.3396	17	19.2059	1	46.2118	190	153.02	1.74805		107	194.576	6	24.2002	3	5.25457	51	41.453	65	627.932	2.25208
ENSRNOG00000005927		1184	721.057	2217	816.909	152	865.497	88	359.32	174	398.093	2.80084		266	275.883	268	907.316	833	889.874	19	462.118	1144	917.319	2.83916		281	508.059	520	1801.19	0	1.31364	582	464.752	3	38.0565	2.75026
ENSRNOG00000007821		1925	1171.95	711	262.236	47	271.529	2	12.1119	52	120.565	2.56547		1126	1164.49	11	40.475	26	28.8089	1	46.2118	1363	1092.77	2.67628		178	322.491	74	259.288	5	7.88186	6	5.58021	53	513.762	2.34596
ENSRNOG00000055749		230	140.561	344	127.067	20	118.794	114	464.29	134	307.1	2.36467		50	52.6967	23	80.9501	867	926.152	142	3304.14	273	219.516	2.96222		44	81.0732	96	335.345	171	225.947	141	113.199	42	409.107	2.36723
ENSRNOG00000005299		389	237.31	3576	1317.44	911	5159.04	0	4.0373	408	930.4	3.18459		1499	1549.9	395	1335.68	59	64.0197	108	2518.54	1489	1193.72	3.12463		1604	2891.61	884	3059.59	54	72.2503	27	22.3209	18	180.768	3.09528
ENSRNOG00000025459		957	582.931	372	137.379	36	209.303	1	8.07461	370	843.957	2.55185		201	208.72	100	340.665	1678	1791.49	14	346.588	11	9.61382	2.73192		183	331.499	357	1237.67	21	28.9001	948	756.518	137	1312.95	2.8654
ENSRNOG00000025053		6025	3666.74	2943	1084.3	328	1861.1	104	423.917	520	1185.18	3.21597		1754	1813.39	622	2101.33	2752	2937.44	10	254.165	102	82.5186	3.15769		1676	3021.33	303	1050.98	819	1077.19	503	401.775	300	2863.75	3.22609
ENSRNOG00000008195		641	390.649	397	146.587	43	248.901	270	1094.11	99	227.482	2.62484		707	731.555	259	876.959	65	70.4217	58	1363.25	38	31.2449	2.78865		297	536.885	30	107.172	794	1044.35	9	7.97174	3	38.0565	2.54019
ENSRNOG00000006816		3449	2099.28	3686	1357.96	162	922.066	839	3391.34	2942	6694.78	3.46136		479	495.969	338	1143.42	1205	1286.8	17	415.906	1254	1005.45	2.93927		877	1581.83	765	2648.19	0	1.31364	1500	1196.56	115	1103.64	3.11604
ENSRNOG00000056487		4251	2587.29	1685	620.969	135	769.331	212	859.946	750	1708.39	3.117		2399	2479.85	524	1770.78	1582	1689.05	96	2241.27	817	655.342	3.2473		251	454.01	635	2198.76	1	2.62729	664	530.12	5	57.0847	2.81192
ENSRNOG00000006370		120	73.6269	10	4.0514	8	50.9116	20	84.7834	2	6.82445	1.64384		2	3.09981	3	13.4917	130	139.776	0	23.1059	7	6.40921	1.57027		156	282.855	10	38.0289	3	5.25457	11	9.56608	3	38.0565	1.87362
ENSRNOG00000029450		1376	837.887	6417	2363.81	24	141.421	5	24.2238	561	1278.45	2.96809		468	484.603	114	387.886	83	89.6276	5	138.635	5	4.80691	2.34461		579	1044.94	53	186.687	430	566.18	141	113.199	98	941.897	2.75632
ENSRNOG00000023781		8210	4996.29	3181	1171.96	248	1408.55	70	286.649	760	1731.13	3.28306		550	569.331	612	2067.6	561	599.652	0	23.1059	2149	1722.48	2.99845		3560	6415.59	89	311.145	3645	4789.54	1090	869.716	38	371.05	3.40678
ENSRNOG00000030355		265	161.858	3693	1360.53	128	729.733	1046	4227.06	384	875.804	3.16761		1246	1288.49	117	398.005	2335	2492.5	23	554.541	679	544.783	3.02353		170	308.078	202	701.805	778	1023.33	606	483.884	8	85.627	2.71646
ENSRNOG00000000231		25	15.8207	272	100.548	41	237.587	93	379.507	114	261.604	2.29888		100	104.36	59	202.375	124	133.374	0	23.1059	107	86.5244	2.04119		2	5.40488	2	10.3715	9	13.1364	297	237.558	4	47.5706	1.79802
ENSRNOG00000051170		3333	2028.7	3190	1175.27	599	3394.11	59	242.238	314	716.567	3.17937		876	906.177	571	1929.31	13	14.9379	0	23.1059	33	27.2392	2.76354		1231	2219.6	149	518.575	2554	3356.36	1539	1227.65	332	3168.2	3.32182
ENSRNOG00000024907		686	418.031	2120	781.183	1	11.3137	56	230.126	1520	3460	2.99128		666	689.191	220	745.415	123	132.307	2	69.3177	11	9.61382	2.51742		844	1522.37	75	262.745	4	6.56821	978	780.433	328	3130.14	3.05708
ENSRNOG00000007400		2210	1345.37	2593	955.393	57	328.097	129	524.85	383	873.529	2.90604		1628	1683.2	175	593.634	1027	1096.87	167	3881.79	5	4.80691	3.16198		420	758.485	38	134.83	5	7.88186	1	1.59435	79	761.129	2.52216
ENSRNOG00000023262		296	180.721	166	61.5076	4	28.2842	29	121.119	24	56.8704	1.95279		18	19.6321	6	23.6104	73	78.9577	11	277.271	91	73.706	1.97605		2	5.40488	12	44.9432	187	246.965	222	177.77	2	28.5423	2.00314
ENSRNOG00000033397		35	21.9055	93	34.621	3	22.6274	86	351.246	29	68.2445	1.99882		28	29.9648	1	6.74584	413	441.736	10	254.165	240	193.078	2.2675		24	45.0407	5	20.743	117	155.01	38	31.0898	2	28.5423	1.74885
ENSRNOG00000006235		1382	841.538	6686	2462.88	445	2522.95	3060	12358.2	471	1073.71	3.58567		2309	2386.85	528	1784.27	8815	9406.63	0	23.1059	116	93.7348	3.43758		878	1583.63	801	2772.65	49	65.6821	3710	2958.31	160	1531.77	3.25101
ENSRNOG00000061499		5492	3342.42	3068	1130.34	612	3467.65	1217	4917.44	1820	4142.44	3.53149		3750	3875.79	623	2104.7	3022	3225.53	13	323.483	3111	2493.18	3.38103		1987	3581.63	1384	4788.18	6	9.1955	1266	1010.02	425	4053.01	3.4295
ENSRNOG00000060728		947	576.846	242	89.4991	158	899.438	317	1283.86	625	1424.03	2.93183		975	1008.47	454	1534.68	84	90.6946	28	670.071	1	1.6023	2.82027		170	308.078	4	17.2858	22	30.2138	835	666.437	15	152.226	2.37079
ENSRNOG00000005309		998	607.879	4392	1617.98	44	254.558	16	68.6342	0	2.27482	2.7078		84	87.8279	203	688.076	391	418.262	60	1409.46	84	68.0979	2.72782		1545	2785.31	366	1268.78	7	10.5091	3351	2672.13	246	2349.99	3.25944
ENSRNOG00000020442		280	170.985	370	136.643	52	299.813	0	4.0373	156	357.146	2.28719		203	210.787	351	1187.27	906	967.765	139	3234.83	704	564.812	3.091		71	129.717	74	259.288	37	49.9184	2549	2032.79	67	646.96	2.795
ENSRNOG00000009271		1338	814.764	4043	1489.44	182	1035.2	12	52.485	1642	3737.52	3.15408		1323	1368.05	283	957.909	981	1047.79	6	161.741	1521	1219.35	2.97817		1499	2702.44	578	2001.7	94	124.796	5969	4759.13	61	589.875	3.30869
ENSRNOG00000007142		5051	3074.08	10944	4031.14	223	1267.13	275	1114.3	104	238.856	3.28894		698	722.255	297	1005.13	386	412.927	0	23.1059	13	11.2161	2.63842		660	1190.88	540	1870.33	40	53.8594	3448	2749.45	183	1750.6	3.18271
ENSRNOG00000014719		303	184.98	20	7.73449	4	28.2842	17	72.6715	3	9.09926	1.78214		213	221.12	1	6.74584	47	51.2158	133	3096.19	24	20.0288	2.83191		3	7.20651	24	86.4292	35	47.2911	11	9.56608	3	38.0565	1.57646
ENSRNOG00000047179		436	265.909	958	353.208	31	181.019	1051	4247.24	811	1847.15	3.13953		5	6.19962	427	1443.61	23	25.6079	0	23.1059	6030	4831.75	3.10245		53	97.2878	466	1614.5	36	48.6048	128	102.835	42	409.107	2.6575
ENSRNOG00000034066		1809	1101.36	5247	1932.89	115	656.194	924	3734.51	259	591.452	3.20501		2445	2527.38	1651	5572.06	513	548.436	99	2310.59	944	757.088	3.36979		1219	2197.98	291	1009.49	1205	1584.25	1101	878.485	122	1170.24	3.13611
ENSRNOG00000015133		1137	692.458	3000	1105.3	41	237.587	155	629.82	555	1264.8	2.89542		737	762.553	417	1409.88	1219	1301.73	23	554.541	489	392.564	2.94658		1026	1850.27	309	1071.72	6908	9075.96	897	715.862	206	1969.42	3.46785
ENSRNOG00000017151		2448	1490.19	2983	1099.03	253	1436.84	7354	29694.4	789	1797.1	3.85147		557	576.564	395	1335.68	10426	11125.6	422	9773.79	7090	5680.97	3.75576		85	154.94	1006	3481.37	6752	8871.03	2230	1778.49	183	1750.6	3.50614
ENSRNOG00000006864		175	107.094	281	103.863	18	107.48	21	88.8207	690	1571.9	2.59751		104	108.493	56	192.256	982	1048.86	3	92.4236	128	103.349	2.49006		89	162.146	39	138.287	44	59.1139	230	184.147	11	114.169	2.11917
ENSRNOG00000017600		1126	685.765	2906	1070.67	526	2981.16	2120	8563.12	1347	3066.45	3.515		677	700.557	210	711.686	6096	6505.47	206	4782.92	4614	3697.32	3.51582		800	1443.1	881	3049.22	5703	7493.02	1847	1473.18	142	1360.52	3.47185
ENSRNOG00000009029		1188	723.491	456	168.317	30	175.362	0	4.0373	550	1253.42	2.66738		310	321.347	250	846.603	1540	1644.24	7	184.847	1252	1003.84	2.90319		573	1034.13	170	591.176	401	528.084	234	187.336	3	38.0565	2.67739
ENSRNOG00000051671		2638	1605.8	3607	1328.86	348	1974.24	1317	5321.17	422	962.247	3.34995		1034	1069.43	763	2576.91	64	69.3547	11	277.271	680	545.584	2.95795		406	733.262	1264	4373.32	66	88.0141	1834	1462.81	122	1170.24	3.19466
ENSRNOG00000054446		1113	677.855	2380	876.944	144	820.242	1	8.07461	1188	2704.76	3.00757		287	297.582	252	853.349	823	879.204	2	69.3177	2	2.40346	2.62363		44	81.0732	286	992.208	3300	4336.33	610	487.073	127	1217.81	3.15317
ENSRNOG00000058866		1496	910.905	811	299.067	211	1199.25	0	4.0373	191	436.765	2.75588		634	656.126	145	492.446	53	57.6178	3	92.4236	22	18.4265	2.42063		1126	2030.43	156	542.776	5	7.88186	1081	862.542	25	247.367	2.86817
ENSRNOG00000009439		1501	913.948	215	79.5547	43	248.901	55	226.089	144	329.848	2.5559		416	430.873	65	222.613	28	30.9429	6	161.741	2103	1685.62	2.70446		15	28.826	102	356.088	1771	2327.77	1589	1267.51	75	723.073	2.97343
ENSRNOG00000024336		192	117.438	1122	413.611	2	16.9705	4	20.1865	275	627.849	2.37878		270	280.016	260	880.332	3	4.26798	0	23.1059	100	80.9163	2.40437		217	392.755	442	1531.53	7	10.5091	433	345.973	25	247.367	2.70383
ENSRNOG00000023861		1039	632.827	314	116.017	29	169.705	3	16.1492	272	621.025	2.49296		507	524.901	117	398.005	2382	2542.65	231	5360.57	17	14.4207	3.24751		461	832.351	97	338.803	1	2.62729	2532	2019.24	7	76.1129	2.81546
ENSRNOG00000014521		206	125.957	287	106.073	20	118.794	3	16.1492	0	2.27482	1.86835		340	352.345	77	263.088	709	757.567	90	2102.64	3	3.20461	2.84246		4	9.00813	3	13.8287	8	11.8228	11	9.56608	41	399.593	1.94824
ENSRNOG00000022999		335	204.452	566	208.831	65	373.352	37	153.418	109	250.23	2.37668		487	504.235	37	128.171	135	145.111	22	531.436	373	299.631	2.50747		853	1538.59	43	152.115	446	587.198	141	113.199	7	76.1129	2.69324
ENSRNOG00000009198		1178	717.406	207	76.6083	80	458.204	625	2527.35	814	1853.98	3.05181		1946	2011.78	815	2752.3	1979	2112.65	16	392.8	347	278.801	3.17888		1205	2172.76	1088	3764.86	112	148.442	2371	1890.9	129	1236.83	3.26547
ENSRNOG00000011491		171	104.66	2094	771.607	1	11.3137	28	117.082	41	95.5423	2.3425		4	5.16635	206	698.194	7	8.53596	6	161.741	7	6.40921	2.24554		419	756.683	3	13.8287	2	3.94093	402	321.261	44	428.135	2.48397
ENSRNOG00000015458		63	38.9432	234	86.5526	19	113.137	639	2583.88	72	166.062	2.77649		345	357.511	31	107.933	394	421.463	19	462.118	403	323.665	2.52445		4	9.00813	18	65.6862	391	514.948	184	147.477	12	123.683	2.23593
ENSRNOG00000018153		1811	1102.58	6557	2415.37	64	367.695	39	161.492	1160	2641.06	3.12634		441	456.705	735	2482.47	62	67.2207	10	254.165	373	299.631	2.8525		1266	2282.66	425	1472.75	0	1.31364	777	620.201	11	114.169	2.95338
ENSRNOG00000030714		422	257.39	4126	1520.01	246	1397.24	126	512.738	76	175.161	2.8879		2863	2959.28	920	3106.46	95	102.432	461	10674.9	3721	2981.89	3.59824		1807	3257.34	429	1486.58	12051	15832	1812	1445.28	249	2378.53	3.68842
ENSRNOG00000053889		4896	2979.76	3888	1432.35	91	520.43	308	1247.53	130	298.001	3.11248		2464	2547.01	585	1976.53	526	562.307	0	23.1059	8728	6993.25	3.38389		799	1441.3	165	573.89	3	5.25457	2124	1693.99	187	1788.65	3.04164
ENSRNOG00000021091		541	329.8	13597	5008.26	269	1527.35	313	1267.71	1221	2779.83	3.33897		450	466.004	5	20.2375	676	722.356	609	14094.6	664	532.766	3.50067		707	1275.55	842	2914.39	1695	2227.94	768	613.026	201	1921.85	3.25299
ENSRNOG00000047505		100	61.4572	1404	517.474	213	1210.56	124	504.663	816	1858.52	2.91936		57	59.9296	657	2219.38	505	539.9	1	46.2118	24	20.0288	2.76124		1051	1895.31	231	802.063	14	19.7046	207	165.812	7	76.1129	2.77218
ENSRNOG00000047247		3135	1908.22	6827	2514.81	431	2443.76	1092	4412.77	546	1244.32	3.39877		1023	1058.07	647	2185.65	42	45.8808	0	23.1059	982	787.532	2.91384		1471	2651.99	1425	4929.92	2	3.94093	1659	1323.31	61	589.875	3.27871
ENSRNOG00000048411		15	9.73579	34	12.8908	3	22.6274	21	88.8207	11	27.2978	1.50886		23	24.7985	5	20.2375	58	62.9527	3	92.4236	33	27.2392	1.6583		9	18.0163	3	13.8287	25	34.1547	38	31.0898	0	9.51411	1.3288
ENSRNOG00000015813		603	367.526	8071	2972.99	49	282.842	242	981.065	500	1139.68	3.06025		99	103.327	59	202.375	86	92.8286	76	1779.15	52	42.461	2.64741		562	1014.32	279	968.007	0	1.31364	1893	1509.85	17	171.254	2.86507
ENSRNOG00000018372		223	136.301	2120	781.183	20	118.794	7	32.2984	456	1039.59	2.62494		388	401.942	6	23.6104	23	25.6079	5	138.635	2	2.40346	2.0735		177	320.69	30	107.172	1	2.62729	8	7.17456	13	133.198	2.05756
ENSRNOG00000018741		737	449.064	484	178.63	3	22.6274	14	60.5596	738	1681.09	2.67979		464	480.47	204	691.449	59	64.0197	465	10767.3	14	12.0173	3.38076		885	1596.24	24	86.4292	0	1.31364	1938	1545.72	55	532.79	2.87651
ENSRNOG00000019834		4214	2564.77	5204	1917.05	179	1018.23	946	3823.33	152	348.047	3.28652		2055	2124.4	697	2354.3	1482	1582.35	14	346.588	2799	2243.22	3.23809		929	1675.51	780	2700.05	2588	3401.02	3638	2900.91	24	237.853	3.33907
ENSRNOG00000011756		1854	1128.74	36	13.6274	274	1555.63	65	266.462	447	1019.12	2.9013		1037	1072.53	105	357.53	55	59.7518	20	485.224	16	13.6196	2.59959		909	1639.48	572	1980.96	782	1028.58	39	31.8869	0	9.51411	2.97224
ENSRNOG00000012207		7048	4289.23	8564	3154.57	300	1702.71	982	3968.67	2768	6298.97	3.58915		5083	5253.14	1881	6347.84	2529	2699.5	15	369.694	12481	9999.98	3.6932		4994	8999.12	2210	7643.8	264	348.115	6809	5428.75	543	5175.68	3.74187
ENSRNOG00000014162		464	282.947	240	88.7625	11	67.8821	30	125.156	654	1490	2.61379		20	21.6987	166	563.278	2	3.20099	10	254.165	67	54.4783	2.25374		11	21.6195	402	1393.24	4	6.56821	979	781.23	1	19.0282	2.64771
ENSRNOG00000014516		490	298.767	7544	2778.89	123	701.449	395	1598.77	42	97.8171	3.03947		392	406.075	615	2077.72	14	16.0049	0	23.1059	9134	7318.52	3.29409		6	12.6114	99	345.717	989	1300.51	240	192.119	53	513.762	2.67481
ENSRNOG00000013516		4441	2702.9	8464	3117.74	133	758.017	951	3843.51	2071	4713.42	3.48103		1012	1046.7	307	1038.86	612	654.068	70	1640.52	4	4.00576	2.94292		581	1048.55	164	570.433	0	1.31364	1317	1050.67	149	1427.12	2.91361
ENSRNOG00000028362		3529	2147.96	471	173.842	91	520.43	34	141.306	383	873.529	2.88729		459	475.304	134	455.344	182	195.26	0	23.1059	25	20.8299	2.36916		1469	2648.39	1256	4345.66	197	260.101	3221	2568.49	66	637.446	3.32057
ENSRNOG00000054342		119	73.0185	191	70.7153	10	62.2253	167	678.267	24	56.8704	2.27466		42	44.4306	1	6.74584	541	578.312	100	2333.7	287	230.732	2.80535		25	46.8423	33	117.544	544	715.935	17	14.3491	16	161.74	2.32486
ENSRNOG00000023385		546	332.842	675	248.977	23	135.764	136	553.111	425	969.072	2.65123		470	486.67	33	114.679	0	1.067	11	277.271	28	23.2334	2.25668		50	91.883	74	259.288	477	627.921	8	7.17456	31	304.452	2.41186
ENSRNOG00000019587		2980	1813.9	7597	2798.41	1145	6482.74	201	815.536	5	13.6489	3.37746		1045	1080.8	304	1028.74	609	650.867	12	300.377	1125	902.097	2.89904		1057	1906.12	222	770.949	0	1.31364	674	538.092	122	1170.24	2.94317
ENSRNOG00000020107		6	4.25941	21	8.1028	7	45.2548	9	40.373	11	27.2978	1.39894		13	14.4658	2	10.1188	262	280.62	8	207.953	122	98.5417	2.08757		0	1.80163	2	10.3715	110	145.814	68	55.005	4	47.5706	1.71694
ENSRNOG00000015055		5159	3139.79	5253	1935.1	494	2800.14	2367	9560.34	784	1785.73	3.58481		5388	5568.29	1413	4769.31	2336	2493.57	0	23.1059	3435	2752.76	3.49435		4200	7568.63	1276	4414.8	1826	2400.03	3101	2472.83	512	4880.74	3.63823
ENSRNOG00000017072		2109	1283.91	1661	612.129	10	62.2253	466	1885.42	37	86.443	2.89544		419	433.973	68	232.731	1765	1884.31	5	138.635	367	294.824	2.7759		1842	3320.4	512	1773.53	152	200.987	65	52.6135	23	228.339	3.04734
ENSRNOG00000025418		745	453.931	1920	707.521	2	16.9705	12	52.485	478	1089.64	2.66662		972	1005.37	29	101.188	584	624.192	5	138.635	199	160.23	2.60844		18	34.2309	25	89.8864	78	103.778	11	9.56608	7	76.1129	1.79737
ENSRNOG00000018584		259	158.207	67	25.045	16	96.1664	269	1090.07	126	288.902	2.52072		42	44.4306	68	232.731	450	481.215	0	23.1059	250	201.089	2.29339		599	1080.98	48	169.401	1783	2343.54	962	767.678	222	2121.65	3.11282
ENSRNOG00000016962		15	9.73579	53	19.8887	0	5.65684	18	76.7088	14	34.1222	1.46572		30	32.0313	2	10.1188	50	54.4168	4	115.529	75	60.8875	1.73717		2	5.40488	10	38.0289	82	109.032	31	25.5096	2	28.5423	1.61599
ENSRNOG00000019476		967	589.016	1081	398.51	21	124.451	3	16.1492	117	268.428	2.44609		1108	1145.9	155	526.176	367	392.654	76	1779.15	3	3.20461	2.88616		768	1385.45	503	1742.41	2174	2857.17	376	300.534	0	9.51411	3.10003
ENSRNOG00000023993		2986	1817.55	2114	778.973	345	1957.27	131	532.924	695	1583.27	3.12516		2350	2429.22	455	1538.05	1137	1214.24	269	6238.59	3	3.20461	3.35882		118	214.394	101	352.631	5	7.88186	2776	2213.75	30	294.938	2.79009
ENSRNOG00000012733		476	290.248	2174	801.072	250	1419.87	1288	5204.09	199	454.963	3.21326		1376	1422.81	881	2974.92	1071	1143.82	7	184.847	4261	3414.51	3.26202		1680	3028.53	65	228.173	1281	1684.09	3977	3171.16	66	637.446	3.24301
ENSRNOG00000016196		2345	1427.51	8593	3165.25	57	328.097	346	1400.94	1146	2609.21	3.25193		3042	3144.24	400	1352.54	2450	2615.21	53	1247.72	6	5.60806	3.22351		2150	3875.3	1358	4698.29	87	115.601	916	731.008	214	2045.53	3.36043
ENSRNOG00000061121		1438	875.613	856	315.641	71	407.293	89	363.357	426	971.346	2.76838		768	794.584	516	1743.8	2418	2581.06	0	23.1059	1427	1144.04	3.09945		803	1448.51	238	826.263	24	32.8411	934	745.357	97	932.383	2.9015
ENSRNOG00000061516		29	18.2546	47	17.6788	2	16.9705	6	28.2611	18	43.2215	1.3958		19	20.6654	6	23.6104	42	45.8808	2	69.3177	12	10.415	1.5312		10	19.8179	7	27.6574	12	17.0774	11	9.56608	1	19.0282	1.2702
ENSRNOG00000002940		1694	1031.39	2367	872.156	371	2104.35	458	1853.12	522	1189.73	3.14926		1429	1477.57	625	2111.45	184	197.394	40	947.342	4187	3355.22	3.20892		521	940.449	215	746.749	2	3.94093	2360	1882.13	46	447.163	2.9053
ENSRNOG00000003428		394	240.352	158	58.5611	23	135.764	12	52.485	1028	2340.79	2.7525		502	519.734	132	448.598	5	6.40197	84	1964	131	105.752	2.78454		515	929.639	221	767.492	995	1308.39	1222	974.943	15	152.226	2.91726
ENSRNOG00000001996		154	94.3155	275	101.653	2	16.9705	841	3399.41	452	1030.49	2.96781		49	51.6635	22	77.5772	25	27.7419	3	92.4236	19	16.023	1.72498		9	18.0163	202	701.805	2	3.94093	465	371.483	5	57.0847	2.36261
ENSRNOG00000002318		314	191.673	37	13.9957	37	214.96	71	290.686	18	43.2215	2.17871		386	399.875	227	769.026	659	704.217	16	392.8	164	132.19	2.6809		960	1731.36	1	6.91434	153	202.301	696	555.63	18	180.768	2.72867
ENSRNOG00000002343		528	321.89	7108	2618.31	78	446.891	1094	4420.85	1148	2613.76	3.31897		1386	1433.14	2042	6890.88	4	5.33498	288	6677.6	0	0.801152	3.47735		1132	2041.24	836	2893.65	5388	7079.22	1943	1549.71	16	161.74	3.43856
ENSRNOG00000003840		809	492.875	372	137.379	269	1527.35	0	4.0373	3	9.09926	2.63764		530	548.666	127	431.734	6	7.46897	2	69.3177	4	4.00576	2.32682		144	261.236	408	1413.98	7	10.5091	5	4.78304	48	466.192	2.63482
ENSRNOG00000050437		177	108.311	1495	550.99	96	548.714	292	1182.93	346	789.361	2.8035		115	119.859	394	1332.3	6	7.46897	0	23.1059	3963	3175.77	2.96928		758	1367.43	4	17.2858	38	51.2321	124	99.6467	10	104.655	2.51594
ENSRNOG00000005700		31	19.4716	1427	525.945	9	56.5684	404	1635.11	16	38.6719	2.65816		184	191.155	404	1366.03	227	243.275	282	6538.97	40	32.8472	3.22387		270	488.241	132	459.803	12	17.0774	588	469.535	0	9.51411	2.46065
ENSRNOG00000038140		311	189.848	117	43.4605	32	186.676	766	3096.61	546	1244.32	2.97872		40	42.364	9	33.7292	468	500.421	15	369.694	607	487.1	2.45737		19	36.0325	260	902.321	357	470.284	166	133.128	8	85.627	2.51252
ENSRNOG00000005218		215	131.433	66	24.6767	3	22.6274	90	367.395	111	254.779	2.20461		115	119.859	53	182.138	45	49.0818	0	23.1059	13	11.2161	1.88694		31	57.652	6	24.2002	12	17.0774	17	14.3491	18	180.768	1.76945
ENSRNOG00000052080		3729	2269.66	5662	2085.73	337	1912.01	468	1893.5	176	402.642	3.23368		1023	1058.07	318	1075.96	136	146.178	0	23.1059	11452	9175.59	3.36093		2152	3878.9	25	89.8864	1616	2124.16	9380	7478.28	103	989.468	3.46421
ENSRNOG00000051889		1844	1122.66	903	332.951	80	458.204	1	8.07461	1066	2427.23	2.93943		742	767.719	406	1372.78	580	619.924	2	69.3177	7	6.40921	2.75376		473	853.971	287	995.665	2	3.94093	174	139.505	42	409.107	2.68164
ENSRNOG00000005434		4675	2845.29	9381	3455.47	836	4734.78	320	1295.97	722	1644.69	3.44642		2818	2912.79	915	3089.59	449	480.148	216	5013.98	61	49.6714	3.36347		1853	3340.22	276	957.636	89	118.228	663	529.323	14	142.712	3.00759
ENSRNOG00000002376		454	276.862	1436	529.26	31	181.019	102	415.842	41	95.5423	2.47669		468	484.603	46	158.527	509	544.168	0	23.1059	2	2.40346	2.38482		44	81.0732	17	62.229	3	5.25457	1344	1072.2	44	428.135	2.51822
ENSRNOG00000057270		33	20.6886	165	61.1393	6	39.5979	19	80.7461	11	27.2978	1.66176		24	25.8317	8	30.3563	192	205.93	0	23.1059	45	36.853	1.80899		17	32.4293	25	89.8864	25	34.1547	229	183.35	8	85.627	1.92988
ENSRNOG00000017113		1554	946.198	1059	390.407	49	282.842	122	496.588	556	1267.07	2.83035		306	317.214	186	630.736	24	26.6749	0	23.1059	2	2.40346	2.30109		838	1511.56	502	1738.96	2	3.94093	580	463.158	48	466.192	2.9226
ENSRNOG00000004099		8771	5337.65	22174	8167.25	1730	9792	136	553.111	379	864.43	3.69398		4300	4444.09	1304	4401.66	596	636.996	0	23.1059	3209	2571.7	3.38301		692	1248.53	2682	9275.58	1925	2530.08	4142	3302.69	156	1493.72	3.55268
ENSRNOG00000021298		18	11.5613	1858	684.686	58	333.754	115	468.327	423	964.522	2.69247		6	7.23288	174	590.261	1935	2065.7	0	23.1059	10	8.81267	2.73161		80	145.932	2	10.3715	23	31.5274	686	547.658	54	523.276	2.40097
ENSRNOG00000060544		167	102.226	1776	654.485	13	79.1958	316	1279.83	143	327.573	2.68901		339	351.312	403	1362.66	279	298.759	245	5684.05	0	0.801152	3.18738		910	1641.28	158	549.69	2	3.94093	205	164.218	7	76.1129	2.68757
ENSRNOG00000013312		476	290.248	839	309.38	3	22.6274	7	32.2984	5	13.6489	2.12594		587	607.562	21	74.2042	10	11.737	7	184.847	2	2.40346	2.24588		88	160.345	260	902.321	3	5.25457	54	43.8445	2	28.5423	2.35805
ENSRNOG00000002525		1258	766.085	1319	486.168	0	5.65684	40	165.529	271	618.75	2.61113		28	29.9648	35	121.425	1967	2099.85	150	3488.99	55	44.8645	3.06334		138	250.426	145	504.747	2409	3165.88	1735	1383.89	33	323.48	3.05142
ENSRNOG00000004736		663	404.035	580	213.987	33	192.333	27	113.045	29	68.2445	2.29739		117	121.926	15	53.9667	140	150.446	4	115.529	86	69.7002	2.00993		13	25.2228	9	34.5717	252	332.352	146	117.185	17	171.254	2.13391
ENSRNOG00000002934		2484	1512.09	5596	2061.43	168	956.007	273	1106.22	977	2224.77	3.19648		3674	3797.26	939	3170.54	4731	5049.02	155	3604.52	10703	8575.53	3.68479		679	1225.11	297	1030.24	0	1.31364	3563	2841.13	223	2131.16	3.1601
ENSRNOG00000046996		34	21.2971	901	332.215	5	33.9411	27	113.045	4	11.3741	2.01019		111	115.726	237	802.755	1064	1136.35	0	23.1059	4022	3223.03	3.02539		371	670.205	419	1452.01	2	3.94093	49	39.8587	21	209.311	2.67675
ENSRNOG00000003616		527	321.281	752	277.337	90	514.773	697	2818.04	127	291.176	2.92661		241	250.051	62	212.494	2972	3172.18	35	831.812	905	725.843	3.0164		505	911.623	166	577.347	1408	1850.92	764	609.838	37	361.536	2.93563
ENSRNOG00000033790		1348	820.849	3316	1221.68	91	520.43	12	52.485	64	147.863	2.74246		262	271.75	181	613.871	2005	2140.39	129	3003.77	2097	1680.82	3.18812		449	810.732	590	2043.19	435	572.748	2168	1729.07	154	1474.69	3.12257
ENSRNOG00000002393		469	285.989	3555	1309.71	142	808.929	39	161.492	182	416.291	2.7756		418	432.94	2	10.1188	86	92.8286	0	23.1059	8641	6923.55	3.17508		579	1044.94	868	3004.28	2	3.94093	1058	844.207	12	123.683	3.00182
ENSRNOG00000002871		1734	1055.73	7373	2715.91	586	3320.57	1891	7638.58	575	1310.29	3.50626		1030	1065.3	1439	4857.01	1241	1325.21	4	115.529	2470	1979.65	3.2715		2035	3668.11	1438	4974.87	897	1179.65	2437	1943.51	189	1807.68	3.43373
ENSRNOG00000049768		318	194.107	2905	1070.31	109	622.253	24	100.933	281	641.498	2.72084		2	3.09981	5	20.2375	776	829.056	326	7555.63	0	0.801152	3.22577		385	695.428	152	528.947	5	7.88186	900	718.253	54	523.276	2.69439
ENSRNOG00000005330		28	17.6461	1853	682.845	231	1312.39	599	2422.38	1455	3312.13	3.19019		1803	1864.02	57	195.629	374	400.123	2	69.3177	96	77.7117	2.71714		953	1718.75	118	411.403	9	13.1364	1705	1359.98	170	1626.91	3.01116
ENSRNOG00000003542		118	72.41	12	4.78802	73	418.606	275	1114.3	283	646.048	2.6544		357	369.91	89	303.563	5	6.40197	11	277.271	179	144.207	2.34296		75	136.924	96	335.345	3394	4459.82	25	20.7265	48	466.192	3.03495
ENSRNOG00000058561		6304	3836.51	8792	3238.54	1423	8055.35	474	1917.72	4238	9642.94	3.7274		4508	4659.01	1680	5669.88	2130	2273.77	144	3350.35	245	197.083	3.50921		2790	5028.34	2012	6959.28	1642	2158.31	3453	2753.44	506	4823.66	3.63795
ENSRNOG00000006542		3494	2126.66	5605	2064.74	31	181.019	2	12.1119	271	618.75	3.00029		2271	2347.59	1038	3504.46	64	69.3547	271	6284.8	6987	5598.45	3.55156		468	844.963	300	1040.61	2244	2949.13	6465	5154.52	41	399.593	3.3176
ENSRNOG00000054307		60	37.1177	29	11.0493	26	152.735	65	266.462	51	118.29	2.06867		7	8.26615	8	30.3563	367	392.654	45	1062.87	65	52.876	2.49053		4	9.00813	33	117.544	166	219.378	380	303.723	17	171.254	2.21532
ENSRNOG00000020644		3668	2232.54	5552	2045.22	2	16.9705	308	1247.53	219	500.46	3.08226		432	447.406	399	1349.17	89	96.0296	9	231.059	2943	2358.59	2.95253		361	652.189	404	1400.15	1298	1706.42	1337	1066.62	28	275.909	3.00871
ENSRNOG00000033169		444	270.777	735	271.075	12	73.539	137	557.148	407	928.125	2.62339		264	273.816	9	33.7292	61	66.1537	120	2795.81	0	0.801152	2.80213		53	97.2878	1299	4494.32	99	131.364	32	26.3067	178	1703.03	3.11074
ENSRNOG00000008065		11	7.30185	1261	464.806	4	28.2842	3	16.1492	6	15.9237	2.02732		36	38.231	2	10.1188	8	9.60296	1	46.2118	8	7.21037	1.34782		10	19.8179	6	24.2002	3	5.25457	41	33.4813	248	2369.01	2.69051
ENSRNOG00000027341		6448	3924.13	4418	1627.56	26	152.735	184	746.901	2	6.82445	3.11114		944	976.439	239	809.501	6661	7108.32	0	23.1059	18515	14834.1	3.67672		3002	5410.28	345	1196.18	5	7.88186	4294	3423.86	90	865.784	3.33862
ENSRNOG00000006557		3152	1918.56	2102	774.554	151	859.84	1450	5858.13	741	1687.91	3.34631		874	904.111	101	344.038	1007	1075.53	62	1455.67	0	0.801152	2.87854		432	780.104	225	781.32	125	165.519	1984	1582.39	16	161.74	2.84149
ENSRNOG00000003343		1301	792.25	203	75.135	57	328.097	501	2026.73	122	279.802	2.84535		703	727.422	323	1092.83	203	217.667	0	23.1059	22	18.4265	2.61898		949	1711.55	269	933.436	289	380.956	193	154.652	20	199.796	2.83
ENSRNOG00000048174		200	122.306	36	13.6274	78	446.891	586	2369.9	7	18.1985	2.77392		126	131.225	370	1251.35	11	12.8039	86	2010.21	0	0.801152	2.83333		152	275.649	9	34.5717	53	70.9367	78	62.9767	75	723.073	2.36818
ENSRNOG00000045816		1213	738.703	1775	654.117	100	571.341	13	56.5223	388	884.903	2.76426		1404	1451.74	121	411.496	1060	1132.08	41	970.448	8398	6728.87	3.3302		85	154.94	29	103.715	3	5.25457	0	0.797174	268	2559.3	2.7519
ENSRNOG00000003226		2850	1734.8	1573	579.718	268	1521.69	400	1618.96	612	1394.46	3.1367		1516	1567.47	146	495.819	832	888.807	40	947.342	308	247.556	2.91876		38	70.2634	335	1161.61	1101	1447.63	2754	2196.21	74	713.559	3.04839
ENSRNOG00000003847		20	12.7782	552	203.675	8	50.9116	118	480.439	31	72.7941	2.21516		129	134.325	8	30.3563	369	394.788	12	300.377	42	34.4495	2.25251		9	18.0163	9	34.5717	114	151.069	82	66.1654	2	28.5423	1.77578
ENSRNOG00000028341		209	127.782	8	3.31478	3	22.6274	43	177.641	46	106.916	1.94278		45	47.5304	30	104.561	36	39.4788	6	161.741	260	209.101	2.05108		2	5.40488	6	24.2002	283	373.075	28	23.118	26	256.881	2.13525
ENSRNOG00000042271		1206	734.444	2641	973.072	6	39.5979	933	3770.84	347	791.636	3.10103		273	283.116	699	2361.04	1928	2058.23	198	4598.07	5997	4805.31	3.45043		228	412.572	333	1154.69	2062	2710.04	2069	1650.15	202	1931.37	3.19639
ENSRNOG00000028834		590	359.616	1074	395.932	15	90.5095	683	2761.52	243	555.055	2.9204		238	246.951	129	438.48	80	86.4266	0	23.1059	1871	1499.76	2.66176		59	108.098	7	27.6574	9	13.1364	159	127.548	5	57.0847	1.82416
ENSRNOG00000015430		1948	1185.94	863	318.219	107	610.939	493	1994.43	183	418.566	2.95695		414	428.807	4	16.8646	218	233.672	0	23.1059	3	3.20461	2.14962		717	1293.57	11	41.486	256	337.606	3	3.18869	31	304.452	2.59776
ENSRNOG00000002755		1417	862.835	1893	697.577	238	1351.99	0	4.0373	1224	2786.65	3.05714		1043	1078.73	241	816.247	8	9.60296	12	300.377	27	22.4322	2.64883		605	1091.79	148	515.118	826	1086.38	603	481.493	58	561.333	2.87345
ENSRNOG00000003116		749	456.365	5267	1940.25	60	345.068	605	2446.61	116	266.153	3.03778		585	605.496	224	758.907	326	348.908	10	254.165	319	256.369	2.64813		159	288.26	349	1210.01	461	606.903	196	157.043	23	228.339	2.69733
ENSRNOG00000003563		375	228.791	1695	624.652	54	311.126	56	230.126	902	2054.16	2.8387		325	336.846	40	138.29	131	140.843	6	161.741	32	26.438	2.20637		20	37.8342	10	38.0289	22	30.2138	63	51.0191	65	627.932	2.19591
ENSRNOG00000003495		699	425.941	3163	1165.33	13	79.1958	39	161.492	861	1960.89	2.88		1264	1307.09	121	411.496	990	1057.39	24	577.647	31	25.6369	2.82985		155	281.054	20	72.6006	3208	4215.48	723	577.154	21	209.311	3.02984
ENSRNOG00000005290		387	236.093	30	11.4176	170	967.32	8	36.3357	371	846.232	2.62271		9	10.3327	370	1251.35	24	26.6749	0	23.1059	792	635.313	2.59035		1248	2250.23	258	895.407	175	231.201	159	127.548	2	28.5423	2.84916
ENSRNOG00000033101		746	454.54	740	272.917	4	28.2842	2	12.1119	592	1348.97	2.62671		145	150.857	104	354.157	578	617.79	1	46.2118	1764	1414.03	2.71316		1013	1826.85	55	193.601	2	3.94093	4	3.98587	22	218.825	2.65267
ENSRNOG00000008891		1594	970.537	682	251.555	278	1578.26	9	40.373	552	1257.97	2.91368		560	579.664	155	526.176	1092	1166.23	70	1640.52	3	3.20461	2.89385		263	475.629	3	13.8287	170	224.633	115	92.4721	57	551.819	2.43405
ENSRNOG00000005538		45	27.9904	551	203.307	61	350.724	344	1392.87	1464	3332.61	3.02592		614	635.461	40	138.29	1039	1109.68	0	23.1059	8	7.21037	2.58291		198	358.524	4	17.2858	3	5.25457	374	298.94	15	152.226	2.22127
ENSRNOG00000002852		661	402.819	55	20.6253	24	141.421	182	738.827	99	227.482	2.48605		349	361.644	2	10.1188	66	71.4887	16	392.8	198	159.429	2.29906		12	23.4211	27	96.8007	84	111.66	101	81.3117	0	9.51411	1.80984
ENSRNOG00000003967		7203	4383.54	1623	598.134	39	226.274	600	2426.42	493	1123.76	3.24344		313	324.447	237	802.755	1051	1122.48	25	600.753	1401	1123.21	2.90022		859	1549.4	819	2834.88	0	1.31364	338	270.242	52	504.248	3.01369
ENSRNOG00000004291		2039	1241.31	5850	2154.98	29	169.705	94	383.544	146	334.398	2.93287		1548	1600.53	547	1848.36	34	37.3448	2	69.3177	244	196.282	2.87527		458	826.947	12	44.9432	470	618.726	1	1.59435	30	294.938	2.55319
ENSRNOG00000002436		597	363.875	318	117.491	19	113.137	2	12.1119	832	1894.92	2.69924		74	77.4952	2	10.1188	5	6.40197	21	508.33	842	675.371	2.40746		5	10.8098	8	31.1145	903	1187.53	38	31.0898	10	104.655	2.43623
ENSRNOG00000007235		575	350.489	1940	714.888	173	984.291	370	1497.84	730	1662.89	3.0179		2557	2643.1	444	1500.95	4	5.33498	0	23.1059	15707	12584.5	3.52523		661	1192.68	5	20.743	7569	9944.28	212	169.798	34	332.994	3.36775
ENSRNOG00000023095		691	421.073	3763	1386.31	33	192.333	161	654.043	144	329.848	2.77577		1036	1071.5	39	134.917	81	87.4936	7	184.847	23	19.2276	2.47654		734	1324.2	235	815.892	166	219.378	384	306.912	24	237.853	2.76406
ENSRNOG00000004518		447	272.602	77	28.7281	21	124.451	2	12.1119	58	134.214	2.05851		191	198.388	5	20.2375	248	265.682	0	23.1059	1851	1483.73	2.60013		369	666.602	3	13.8287	225	296.883	178	142.694	62	599.389	2.53641
ENSRNOG00000036814		1240	755.133	1107	408.086	23	135.764	5	24.2238	410	934.949	2.65478		1499	1549.9	172	583.515	5	6.40197	3	92.4236	1227	983.814	2.80835		210	380.143	198	687.977	1396	1835.16	11	9.56608	31	304.452	2.80852
ENSRNOG00000054581		44	27.3819	100	37.1992	6	39.5979	11	48.4477	23	54.5956	1.61747		40	42.364	8	30.3563	59	64.0197	1	46.2118	48	39.2564	1.64779		31	57.652	16	58.7719	19	26.2729	324	259.081	58	561.333	2.28471
ENSRNOG00000021044		681	414.988	665	245.294	205	1165.31	490	1982.32	314	716.567	2.9566		69	72.3288	421	1423.37	80	86.4266	53	1247.72	5	4.80691	2.75353		8	16.2146	2	10.3715	3	5.25457	577	460.766	97	932.383	2.45484
ENSRNOG00000005133		1368	833.019	6067	2234.9	616	3490.27	145	589.446	2360	5370.84	3.39858		973	1006.4	648	2189.03	568	607.12	168	3904.9	42	34.4495	3.18988		2864	5161.66	1169	4044.89	4	6.56821	2378	1896.48	16	161.74	3.35301
ENSRNOG00000014354		148	90.6646	734	270.707	18	107.48	358	1449.39	111	254.779	2.63809		224	232.486	31	107.933	1702	1817.09	83	1940.9	0	0.801152	2.91373		22	41.4374	5	20.743	9	13.1364	38	31.0898	25	247.367	1.84976
ENSRNOG00000047296		2404	1463.41	108	40.1457	28	164.048	175	710.566	469	1069.16	2.83851		573	593.097	72	246.223	1057	1128.88	168	3904.9	87	70.5014	3.07508		1113	2007.01	502	1738.96	1	2.62729	8	7.17456	8	85.627	2.88552
ENSRNOG00000024711		158	96.7495	225	83.2378	24	141.421	76	310.872	73	168.336	2.20445		68	71.2956	28	97.8147	280	299.826	8	207.953	111	89.729	2.18561		38	70.2634	43	152.115	137	181.283	151	121.17	6	66.5988	2.07293
ENSRNOG00000021380		8	5.47638	79	29.4647	6	39.5979	420	1699.71	14	34.1222	2.55832		10	11.366	4	16.8646	100	107.767	10	254.165	23	19.2276	1.91317		0	1.80163	2	10.3715	37	49.9184	18	15.1463	2	28.5423	1.32543
ENSRNOG00000006532		450	274.428	800	295.015	15	90.5095	54	222.052	415	946.323	2.56308		280	290.349	60	205.748	697	744.763	34	808.706	558	447.844	2.69852		4	9.00813	76	266.202	4670	6136.03	95	76.5287	5	57.0847	3.11693
ENSRNOG00000045636		1566	953.499	448	165.371	126	718.419	34	141.306	92	211.558	2.6415		571	591.03	103	350.784	365	390.52	6	161.741	92	74.5071	2.49654		3	7.20651	2	10.3715	61	81.4458	37	30.2926	3	38.0565	1.52472
ENSRNOG00000036661		34	21.2971	44	16.5739	17	101.823	199	807.461	39	90.9926	2.31729		82	85.7613	7	26.9834	555	593.25	79	1848.47	770	617.688	2.80238		37	68.4618	27	96.8007	733	964.214	8	7.17456	8	85.627	2.3882
ENSRNOG00000048795		839	511.129	7	2.94647	34	197.99	302	1223.3	170	388.994	2.66733		624	645.793	110	374.394	390	417.195	0	23.1059	15	12.8184	2.46932		193	349.516	464	1607.58	841	1106.09	1598	1274.68	36	352.022	2.97219
ENSRNOG00000009102		831	506.261	2602	958.708	143	814.586	220	892.244	1182	2691.11	3.06914		186	193.221	88	300.19	82	88.5606	30	716.283	0	0.801152	2.41466		804	1450.31	6	24.2002	3	5.25457	488	389.818	122	1170.24	2.78388
ENSRNOG00000025011		519	316.413	5789	2132.51	155	882.468	590	2386.05	32	75.0689	3.0639		389	402.975	382	1291.83	391	418.262	212	4921.56	62	50.4726	3.15138		1098	1979.99	34	121.001	127	168.146	239	191.322	26	256.881	2.73517
ENSRNOG00000013533		960	584.756	893	329.268	117	667.508	725	2931.08	198	452.688	2.99698		1147	1186.19	527	1780.9	943	1007.24	8	207.953	10	8.81267	2.92336		1298	2340.31	82	286.945	0	1.31364	64	51.8163	126	1208.29	2.89083
ENSRNOG00000014311		908	553.115	438	161.688	69	395.979	78	318.947	62	143.313	2.49777		1151	1190.33	335	1133.3	224	240.074	68	1594.31	766	614.483	2.97978		1243	2241.22	529	1832.3	0	1.31364	151	121.17	261	2492.7	3.12637
ENSRNOG00000042195		2348	1429.34	5967	2198.07	179	1018.23	65	266.462	1021	2324.86	3.16059		1392	1439.34	166	563.278	3269	3489.08	10	254.165	189	152.219	3.07174		288	520.67	537	1859.96	79	105.091	1550	1236.42	194	1855.25	3.04746
ENSRNOG00000008734		10	6.69336	112	41.6189	116	661.851	123	500.626	45	104.642	2.4201		230	238.685	114	387.886	9	10.67	176	4089.74	0	0.801152	2.97569		38	70.2634	422	1462.38	35	47.2911	863	688.758	3	38.0565	2.66403
ENSRNOG00000012273		436	265.909	13	5.15633	1	11.3137	138	561.185	39	90.9926	2.27164		50	52.6967	76	259.715	2266	2418.88	101	2356.8	78	63.291	3.01295		108	196.377	5	20.743	2	3.94093	4385	3496.4	18	180.768	2.8919
ENSRNOG00000011237		6890	4193.09	2368	872.524	462	2619.12	863	3488.23	870	1981.36	3.4201		3901	4031.82	2850	9616.2	168	180.322	0	23.1059	1220	978.206	3.47216		4038	7276.77	4157	14374.9	246	324.47	4053	3231.74	203	1940.88	3.73478
ENSRNOG00000010058		402	245.22	91	33.8844	228	1295.42	979	3956.56	194	443.589	3.07734		199	206.654	115	391.259	650	694.614	45	1062.87	662	531.164	2.76141		117	212.592	37	131.372	0	1.31364	1068	852.179	211	2016.99	2.80814
ENSRNOG00000010737		868	528.775	5392	1986.29	198	1125.71	91	371.432	325	741.59	2.97807		728	753.253	372	1258.1	2655	2833.94	4	115.529	984	789.134	3.06069		860	1551.2	193	670.691	550	723.817	1266	1010.02	71	685.016	2.96762
ENSRNOG00000011511		3	2.43395	34	12.8908	7	45.2548	30	125.156	11	27.2978	1.62948		29	30.9981	5	20.2375	73	78.9577	17	415.906	197	158.628	2.14905		52	95.4862	9	34.5717	215	283.747	69	55.8021	5	57.0847	2.02259
ENSRNOG00000018651		1878	1143.35	665	245.294	293	1663.11	914	3694.13	931	2120.13	3.24876		948	980.572	78	266.461	1618	1727.47	243	5637.84	235	189.072	3.24558		10	19.8179	29	103.715	47	63.0548	11	9.56608	6	66.5988	1.72058
ENSRNOG00000022870		73	45.0281	268	99.0751	27	158.392	272	1102.18	22	52.3208	2.46449		21	22.7319	9	33.7292	175	187.791	17	415.906	224	180.259	2.22553		44	81.0732	17	62.229	387	509.693	204	163.421	4	47.5706	2.23754
ENSRNOG00000014170		174	106.485	703	259.289	9	56.5684	42	173.604	283	646.048	2.39515		154	160.157	77	263.088	2	3.20099	0	23.1059	7	6.40921	1.95996		374	675.61	98	342.26	26	35.4684	754	601.866	42	409.107	2.61581
ENSRNOG00000016680		2687	1635.61	826	304.591	295	1674.43	442	1788.53	644	1467.26	3.13801		406	420.541	179	607.126	629	672.207	0	23.1059	3382	2710.3	2.94775		966	1742.17	12	44.9432	20	27.5865	11	9.56608	47	456.677	2.65915
ENSRNOG00000000104		44	27.3819	46	17.3105	4	28.2842	27	113.045	263	600.551	2.19677		38	40.2975	5	20.2375	45	49.0818	0	23.1059	3	3.20461	1.43434		15	28.826	4	17.2858	9	13.1364	32	26.3067	6	66.5988	1.48331
ENSRNOG00000000105		1374	836.67	3137	1155.75	107	610.939	305	1235.42	74	170.611	2.90411		57	59.9296	631	2131.69	0	1.067	135	3142.4	1134	909.307	3.09652		1582	2851.97	7	27.6574	1769	2325.15	73	58.9908	12	123.683	3.03241
ENSRNOG00000018279		49	30.4244	91	33.8844	8	50.9116	129	524.85	32	75.0689	2.15542		38	40.2975	37	128.171	145	155.781	44	1039.77	289	232.334	2.50416		0	1.80163	51	179.773	101	133.992	80	64.5711	6	66.5988	1.95108
ENSRNOG00000016684		216	132.042	1230	453.388	8	50.9116	2	12.1119	2466	5611.97	3.09763		807	834.882	186	630.736	998	1065.93	2	69.3177	687	551.192	2.79962		846	1525.98	175	608.462	1	2.62729	30	24.7124	13	133.198	2.66181
ENSRNOG00000017060		2416	1470.71	5366	1976.71	30	175.362	4	20.1865	301	686.994	2.93751		1092	1129.36	549	1855.11	291	311.563	0	23.1059	412	330.876	2.86332		2426	4372.55	1376	4760.52	28	38.0956	4661	3716.42	7	76.1129	3.41376
ENSRNOG00000017163		947	576.846	593	218.776	67	384.665	180	730.752	2	6.82445	2.58385		256	265.55	337	1140.05	5	6.40197	326	7555.63	0	0.801152	3.25375		419	756.683	526	1821.93	2897	3806.94	659	526.135	22	218.825	3.15415
ENSRNOG00000019223		1947	1185.33	1835	676.215	91	520.43	2	12.1119	77	177.436	2.71122		396	410.208	699	2361.04	1800	1921.66	0	23.1059	120	96.9394	2.98344		122	221.6	4	17.2858	304	400.661	161	129.142	118	1132.18	2.57998
ENSRNOG00000010488		521	317.63	1021	376.412	188	1069.14	310	1255.6	277	632.399	2.86346		1149	1188.26	234	792.636	346	370.247	9	231.059	2541	2036.53	2.96555		2354	4242.83	0	3.45717	20	27.5865	719	573.965	109	1046.55	3.07147
ENSRNOG00000013147		3292	2003.75	1650	608.078	59	339.411	48	197.828	1821	4144.71	3.16398		2615	2703.03	358	1210.88	2508	2677.09	0	23.1059	2972	2381.82	3.25508		543	980.085	276	957.636	13	18.391	1172	935.085	44	428.135	2.82208
ENSRNOG00000028227		684	416.814	263	97.2336	24	141.421	27	113.045	105	241.13	2.3052		169	175.656	71	242.85	21	23.4739	19	462.118	13	11.2161	2.2626		28	52.2472	7	27.6574	29	39.4093	521	416.125	50	485.22	2.30991
ENSRNOG00000058662		360	219.664	1748	644.172	52	299.813	4	20.1865	2	6.82445	2.37682		102	106.427	15	53.9667	24	26.6749	0	23.1059	7	6.40921	1.63666		624	1126.02	103	359.546	41	55.173	121	97.2552	37	361.536	2.60196
ENSRNOG00000018452		1224	745.397	3166	1166.43	383	2172.23	25	104.97	9	22.7482	2.9255		1738	1796.86	253	856.722	2649	2827.54	0	23.1059	5917	4741.22	3.31156		1134	2044.85	9	34.5717	107	141.873	973	776.447	123	1179.75	2.92195
ENSRNOG00000018795		515	313.979	1479	545.097	50	288.499	1227	4957.81	1004	2286.19	3.22487		585	605.496	538	1818	2444	2608.8	9	231.059	4166	3338.4	3.23562		445	803.525	255	885.035	1259	1655.19	1390	1108.87	17	171.254	2.96604
ENSRNOG00000022753		2698	1642.31	5798	2135.82	629	3563.81	463	1873.31	135	309.375	3.27988		369	382.31	315	1065.84	596	636.996	220	5106.4	44	36.0518	3.16002		2663	4799.53	289	1002.58	3506	4606.94	2835	2260.78	29	285.423	3.41348
ENSRNOG00000019433		1518	924.292	316	116.754	15	90.5095	158	641.931	11	27.2978	2.55649		173	179.789	340	1150.17	187	200.595	35	831.812	0	0.801152	2.67452		756	1363.83	60	210.887	19	26.2729	219	175.378	37	361.536	2.63102
ENSRNOG00000019974		276	168.551	2094	771.607	202	1148.34	31	129.194	28	65.9697	2.65966		958	990.905	202	684.703	646	690.346	2	69.3177	0	0.801152	2.68772		21	39.6358	59	207.43	22	30.2138	17	14.3491	14	142.712	1.93886
ENSRNOG00000010830		1520	925.509	567	209.199	268	1521.69	22	92.858	409	932.675	2.86711		663	686.091	747	2522.94	957	1022.18	308	7139.72	13328	10678.6	3.64443		118	214.394	814	2817.59	7310	9604.04	769	613.824	223	2131.16	3.48801
ENSRNOG00000012108		54	33.4668	104	38.6724	7	45.2548	23	96.8953	26	61.42	1.74148		41	43.3973	16	57.3396	88	94.9626	7	184.847	45	36.853	1.92158		26	48.6439	10	38.0289	33	44.6639	42	34.2785	7	76.1129	1.68436
ENSRNOG00000028586		856	521.474	210	77.7132	13	79.1958	56	230.126	38	88.7178	2.29982		82	85.7613	6	23.6104	183	196.327	24	577.647	303	243.55	2.35291		14	27.0244	18	65.6862	342	450.579	193	154.652	58	561.333	2.40115
ENSRNOG00000024142		883	537.903	2543	936.978	41	237.587	23	96.8953	104	238.856	2.61241		174	180.822	81	276.579	242	259.28	72	1686.73	50	40.8587	2.68918		411	742.27	69	242.002	29	39.4093	1003	800.362	5	57.0847	2.57545
ENSRNOG00000030285		1276	777.038	948	349.525	4	28.2842	37	153.418	36	84.1682	2.4448		57	59.9296	15	53.9667	89	96.0296	2	69.3177	95	76.9106	1.85267		61	111.701	172	598.09	261	344.174	54	43.8445	5	57.0847	2.36357
ENSRNOG00000006997		104	63.8912	2574	948.395	20	118.794	606	2450.64	240	548.231	2.91698		308	319.28	154	522.803	1	2.13399	10	254.165	4780	3830.31	2.99376		810	1461.12	58	203.973	3734	4906.46	1614	1287.44	8	85.627	3.2011
ENSRNOG00000002051		1383	842.146	1560	574.93	435	2466.38	21	88.8207	840	1913.12	3.07081		1904	1968.38	346	1170.4	862	920.817	5	138.635	1495	1198.52	3.03316		539	972.878	1528	5286.01	679	893.277	243	194.51	35	342.508	3.18691
ENSRNOG00000002021		5934	3611.37	12222	4501.84	654	3705.23	214	868.021	2363	5377.66	3.55785		1944	2009.71	674	2276.72	2061	2200.14	0	23.1059	3424	2743.94	3.26734		1094	1972.78	650	2250.62	6269	8236.54	5614	4476.13	429	4091.07	3.62381
ENSRNOG00000001682		8146	4957.35	10187	3752.33	536	3037.73	373	1509.95	1272	2895.84	3.50929		3427	3542.05	980	3308.83	1455	1553.55	11	277.271	2	2.40346	3.23975		752	1356.62	531	1839.21	2135	2805.94	3159	2519.07	97	932.383	3.27661
ENSRNOG00000030314		891	542.771	8798	3240.75	538	3049.04	0	4.0373	15	36.3971	3.13818		2937	3035.74	644	2175.53	46	50.1488	2	69.3177	3708	2971.47	3.22022		577	1041.34	610	2112.33	1356	1782.61	871	695.135	55	532.79	3.09091
ENSRNOG00000001796		68	41.9856	5495	2024.23	112	639.223	5	24.2238	141	323.024	2.78571		449	464.971	38	131.544	29	32.0099	339	7856	8	7.21037	3.23003		132	239.616	28	100.258	10	14.4501	1511	1205.33	0	9.51411	2.4967
ENSRNOG00000029912		34	21.2971	904	333.32	176	1001.26	156	633.857	303	691.544	2.72937		1142	1181.03	367	1241.23	13	14.9379	77	1802.26	749	600.864	2.9859		394	711.642	487	1687.1	1248	1640.74	581	463.955	6	66.5988	2.96095
ENSRNOG00000060045		1141	694.892	2399	883.941	69	395.979	6	28.2611	956	2177	2.92221		419	433.973	326	1102.94	103	110.968	0	23.1059	441	354.109	2.60748		14	27.0244	1081	3740.66	12	17.0774	882	703.904	18	180.768	2.97029
ENSRNOG00000001813		1064	648.039	1571	578.982	3	22.6274	473	1913.68	139	318.474	2.84283		467	483.57	339	1146.79	21	23.4739	7	184.847	67	54.4783	2.57822		259	468.423	338	1171.98	0	1.31364	1173	935.882	80	770.643	2.82585
ENSRNOG00000015602		489	298.159	2535	934.031	88	503.459	68	278.574	257	586.903	2.71619		650	672.658	209	708.313	1641	1752.01	0	23.1059	7	6.40921	2.80106		2375	4280.66	73	255.831	3	5.25457	3324	2650.6	67	646.96	3.19531
ENSRNOG00000016671		597	363.875	1119	412.506	157	893.781	197	799.386	832	1894.92	2.94096		443	458.772	143	485.701	835	892.008	0	23.1059	19	16.023	2.57417		298	538.686	663	2295.56	25	34.1547	121	97.2552	206	1969.42	2.99432
ENSRNOG00000016632		716	436.285	1300	479.17	24	141.421	415	1679.52	176	402.642	2.79783		196	203.554	58	199.002	1958	2090.24	92	2148.85	1421	1139.24	3.06302		59	108.098	110	383.746	1787	2348.79	675	538.889	24	237.853	2.85942
ENSRNOG00000020423		835	508.695	9619	3543.13	311	1764.94	15	64.5969	9	22.7482	3.07218		1077	1113.86	392	1325.56	156	167.518	6	161.741	9	8.01152	2.74456		1152	2077.28	364	1261.87	1938	2547.15	1483	1183.01	162	1550.8	3.23654
ENSRNOG00000030247		978	595.709	3647	1343.59	57	328.097	14	60.5596	8	20.4733	2.67181		21	22.7319	374	1264.85	239	256.079	121	2818.92	0	0.801152	2.94085		21	39.6358	142	494.375	4	6.56821	979	781.23	7	76.1129	2.44651
ENSRNOG00000055527		604	368.135	32	12.1542	1	11.3137	112	456.215	28	65.9697	2.26188		16	17.5656	5	20.2375	1335	1425.51	30	716.283	985	789.936	2.77372		39	72.0651	31	110.629	324	426.934	118	94.8637	3	38.0565	2.17175
ENSRNOG00000024671		1063	647.43	3545	1306.02	300	1702.71	656	2652.51	77	177.436	3.11301		504	521.801	276	934.299	702	750.098	12	300.377	54	44.0633	2.70768		40	73.8667	596	2063.93	3	5.25457	952	759.706	91	875.299	2.8783
ENSRNOG00000023197		2610	1588.76	998	367.941	9	56.5684	2	12.1119	3	9.09926	2.60948		8	9.29942	76	259.715	987	1054.19	0	23.1059	2	2.40346	2.43095		304	549.496	531	1839.21	2	3.94093	1142	911.169	46	447.163	2.87518
ENSRNOG00000016433		54	33.4668	52	19.5204	10	62.2253	12	52.485	20	47.7711	1.63441		598	618.928	9	33.7292	54	58.6848	0	23.1059	24	20.0288	2.17868		7	14.413	27	96.8007	19	26.2729	33	27.1039	31	304.452	1.97224
ENSRNOG00000018712		2272	1383.09	5604	2064.37	443	2511.64	326	1320.2	710	1617.39	3.25026		316	327.546	729	2462.23	2885	3079.35	429	9935.53	3227	2586.12	3.56563		694	1252.13	115	401.032	2089	2745.51	2546	2030.4	195	1864.77	3.21979
ENSRNOG00000017106		136	83.3627	1029	379.358	6	39.5979	752	3040.09	66	152.413	2.86862		36	38.231	50	172.019	398	425.731	1	46.2118	40	32.8472	2.15536		116	210.79	22	79.5149	4980	6543.25	1109	884.863	23	228.339	3.20122
ENSRNOG00000012405		2373	1444.55	5622	2071	166	944.693	1541	6225.52	325	741.59	3.35898		1373	1419.71	497	1679.71	1450	1548.21	111	2587.86	3	3.20461	3.16069		692	1248.53	465	1611.04	931	1224.32	1360	1084.95	45	437.649	3.04972
ENSRNOG00000012482		628	382.738	1601	590.031	255	1448.15	293	1186.97	619	1410.39	3.00158		1090	1127.3	602	2033.87	583	623.125	309	7162.83	3128	2506.8	3.42988		256	463.018	345	1196.18	2	3.94093	1840	1467.6	46	447.163	2.85466
ENSRNOG00000016326		745	453.931	1131	416.926	2	16.9705	40	165.529	2	6.82445	2.32641		14	15.499	351	1187.27	696	743.696	0	23.1059	2603	2086.2	2.9091		395	713.444	787	2724.25	1121	1473.91	534	426.488	26	256.881	3.04883
ENSRNOG00000049302		723	440.545	1849	681.372	148	842.87	99	403.73	148	338.948	2.73359		106	110.56	379	1281.71	1676	1789.35	15	369.694	953	764.299	2.93607		2726	4913.04	6	24.2002	18	24.9592	1034	825.075	6	66.5988	3.06847
ENSRNOG00000021808		649	395.517	2121	781.552	3	22.6274	85	347.208	409	932.675	2.69541		541	560.032	294	995.011	78	84.2927	0	23.1059	7329	5872.44	3.17811		214	387.35	25	89.8864	59	78.8186	1583	1262.72	3	38.0565	2.5698
ENSRNOG00000029134		3934	2394.4	7749	2854.39	21	124.451	321	1300.01	672	1530.95	3.21507		682	705.723	88	300.19	2762	2948.11	0	23.1059	6	5.60806	2.90121		694	1252.13	78	273.116	2310	3035.83	778	620.998	469	4471.63	3.28572
ENSRNOG00000052707		6199	3772.62	7373	2715.91	305	1730.99	435	1760.26	225	514.108	3.32197		998	1032.24	166	563.278	1755	1873.64	1	46.2118	409	328.472	2.8858		1753	3160.05	302	1047.52	10	14.4501	1279	1020.38	156	1493.72	3.12944
ENSRNOG00000014257		57	35.2923	108	40.1457	9	56.5684	106	431.992	30	70.5193	2.10347		115	119.859	4	16.8646	146	156.848	5	138.635	319	256.369	2.13898		0	1.80163	42	148.658	35	47.2911	65	52.6135	36	352.022	2.08091
ENSRNOG00000018000		1248	760	24	9.20772	15	90.5095	27	113.045	121	277.528	2.39804		572	592.063	2	10.1188	5	6.40197	256	5938.21	18	15.2219	3.11807		363	655.792	0	3.45717	5	7.88186	1809	1442.88	5	57.0847	2.63691
ENSRNOG00000018668		582	354.748	202	74.7667	2	16.9705	8	36.3357	17	40.9467	2.02017		20	21.6987	22	77.5772	435	465.21	0	23.1059	8	7.21037	2.0754		308	556.703	174	605.005	3	5.25457	1184	944.651	14	142.712	2.65405
ENSRNOG00000017817		2779	1691.59	2084	767.924	416	2358.9	98	399.693	249	568.704	3.06347		11	12.3992	953	3217.77	2264	2416.75	197	4574.97	625	501.521	3.33136		3	7.20651	468	1621.41	2	3.94093	52	42.2502	198	1893.31	2.85347
ENSRNOG00000027906		4825	2936.56	15252	5617.82	892	5051.56	2175	8785.18	423	964.522	3.66942		2871	2967.55	1919	6476.01	1722	1838.43	111	2587.86	2951	2365	3.51148		2325	4190.58	4678	16176.1	3182	4181.32	7385	5887.92	113	1084.61	3.79962
ENSRNOG00000017023		1640	998.527	1845	679.898	383	2172.23	2213	8938.59	402	916.751	3.43794		932	964.04	691	2334.06	2567	2740.04	0	23.1059	500	401.377	3.11144		766	1381.85	323	1120.12	675	888.022	141	113.199	73	704.044	2.92503
ENSRNOG00000000774		1745	1062.42	836	308.275	106	605.282	7	32.2984	1444	3287.11	3.02493		602	623.061	163	553.159	434	464.143	0	23.1059	205	165.037	2.56313		205	371.135	56	197.059	3	5.25457	234	187.336	68	656.474	2.45248
ENSRNOG00000061216		2063	1255.92	90	33.5161	106	605.282	30	125.156	89	204.733	2.64828		1109	1146.93	485	1639.24	463	495.086	182	4228.38	225	181.06	3.187		762	1374.64	38	134.83	3283	4314	1105	881.674	0	9.51411	3.12805
ENSRNOG00000028505		247	150.905	5	2.20985	311	1764.94	181	734.789	142	325.299	2.77497		71	74.3954	80	273.207	357	381.984	0	23.1059	512	410.991	2.36686		2	5.40488	22	79.5149	254	334.979	222	177.77	13	133.198	2.16487
ENSRNOG00000052795		48	29.8159	127	47.1435	31	181.019	15	64.5969	33	77.3437	1.903		114	118.826	13	47.2209	235	251.811	14	346.588	178	143.406	2.25905		25	46.8423	20	72.6006	55	73.564	64	51.8163	3	38.0565	1.75263
ENSRNOG00000045860		113	69.3675	713	262.973	6	39.5979	2	12.1119	145	332.123	2.15605		3	4.13308	86	293.444	167	179.255	0	23.1059	8	7.21037	2.00617		2	5.40488	5	20.743	3	5.25457	21	17.5378	12	123.683	1.53813
ENSRNOG00000048682		2715	1652.65	5461	2011.7	851	4819.63	951	3843.51	1901	4326.7	3.52255		2954	3053.31	1710	5771.07	2385	2545.85	412	9542.73	5045	4042.61	3.6982		579	1044.94	950	3287.77	571	751.404	2638	2103.74	275	2625.9	3.29287
ENSRNOG00000053288		3887	2365.8	7473	2752.74	573	3247.03	128	520.812	3190	7258.94	3.50908		2019	2087.2	1043	3521.33	5178	5525.97	1	46.2118	4958	3972.91	3.48155		867	1563.81	1282	4435.55	1957	2572.11	5995	4779.85	274	2616.38	3.50427
ENSRNOG00000000648		5974	3635.71	4508	1660.7	457	2590.83	858	3468.04	2329	5300.32	3.52259		1532	1584	619	2091.21	729	778.907	0	23.1059	12	10.415	2.95305		710	1280.96	1285	4445.92	2674	3513.99	10673	8509.03	36	352.022	3.55875
ENSRNOG00000000796		1365	831.193	4776	1759.41	822	4655.58	1598	6455.65	378	862.155	3.46431		1950	2015.91	383	1295.2	771	823.721	49	1155.29	8	7.21037	3.02509		1401	2525.88	108	376.831	535	704.112	1601	1277.07	158	1512.74	3.10698
ENSRNOG00000000571		529	322.498	1262	465.174	2	16.9705	621	2511.2	477	1087.36	2.9448		1188	1228.56	535	1807.89	630	673.274	70	1640.52	31	25.6369	3.03148		49	90.0813	1409	4874.61	1557	2046.66	1396	1113.65	4	47.5706	3.21339
ENSRNOG00000000894		767	467.318	502	185.259	269	1527.35	19	80.7461	1638	3728.42	3.07839		960	992.972	617	2084.46	250	267.816	59	1386.35	0	0.801152	2.97611		44	81.0732	110	383.746	8	11.8228	718	573.168	81	780.157	2.56347
ENSRNOG00000000968		25	15.8207	1203	443.444	4	28.2842	7	32.2984	27	63.6948	2.0671		20	21.6987	26	91.0688	47	51.2158	0	23.1059	18	15.2219	1.60705		14	27.0244	4	17.2858	14	19.7046	14	11.9576	2	28.5423	1.32021
ENSRNOG00000025235		5790	3523.75	7991	2943.52	105	599.626	483	1954.06	2916	6635.64	3.49573		3665	3787.96	2156	7275.39	2025	2161.73	0	23.1059	860	689.792	3.44523		2613	4709.45	217	753.663	2505	3291.99	440	351.554	667	6355.43	3.4903
ENSRNOG00000001068		172	105.268	3	1.47324	27	158.392	3	16.1492	284	648.323	2.26933		201	208.72	18	64.0855	92	99.2306	27	646.965	19	16.023	2.31598		2	5.40488	1	6.91434	72	95.8959	448	357.931	43	418.621	2.24786
ENSRNOG00000034254		4865	2960.9	2395	882.468	61	350.724	240	972.99	1035	2356.71	3.17747		1156	1195.49	2291	7730.73	1573	1679.45	66	1548.09	4255	3409.7	3.49314		580	1046.75	418	1448.55	6140	8067.08	989	789.202	96	922.869	3.39003
ENSRNOG00000028733		220	134.476	51	19.1521	4	28.2842	19	80.7461	36	84.1682	1.84114		139	144.658	44	151.781	95	102.432	223	5175.72	83	67.2967	3.05245		6	12.6114	79	276.574	266	350.743	361	288.577	3	38.0565	2.28626
ENSRNOG00000028166		16	10.3443	29	11.0493	2	16.9705	200	811.498	63	145.588	2.29905		43	45.4638	4	16.8646	144	154.714	5	138.635	64	52.0749	1.91143		3	7.20651	0	3.45717	23	31.5274	164	131.534	4	47.5706	1.646
ENSRNOG00000001436		2098	1277.21	297	109.756	66	379.009	357	1445.36	235	536.857	2.87485		983	1016.74	203	688.076	1162	1240.92	29	693.177	1274	1021.47	2.96945		345	623.363	1025	3547.06	3447	4529.44	263	210.454	228	2178.73	3.34592
ENSRNOG00000001453		761	463.667	3045	1121.87	369	2093.03	0	4.0373	612	1394.46	3.00664		1090	1127.3	363	1227.74	1796	1917.39	131	3049.98	464	372.536	3.18724		1488	2682.62	51	179.773	134	177.342	4379	3491.62	32	313.966	3.13642
ENSRNOG00000001479		1687	1027.13	8490	3127.31	118	673.164	5	24.2238	88	202.459	3.00469		868	897.911	399	1349.17	1102	1176.9	0	23.1059	2	2.40346	2.83878		278	502.654	1438	4974.87	3751	4928.79	268	214.44	232	2216.79	3.40951
ENSRNOG00000000885		401	244.612	1089	401.457	84	480.832	1	8.07461	482	1098.74	2.65006		172	178.756	498	1683.09	2922	3118.83	248	5753.37	263	211.504	3.34027		1560	2812.34	289	1002.58	859	1129.73	3881	3094.63	37	361.536	3.22535
ENSRNOG00000024435		73	45.0281	15	5.89294	96	548.714	161	654.043	27	63.6948	2.42074		141	146.724	2	10.1188	44	48.0148	0	23.1059	20	16.8242	1.68982		266	481.034	4	17.2858	128	169.46	10	8.76891	5	57.0847	2.16651
ENSRNOG00000001004		3217	1958.11	7298	2688.29	864	4893.17	206	835.722	1456	3314.41	3.43742		4549	4701.37	592	2000.14	3267	3486.94	2	69.3177	1	1.6023	3.31215		4081	7354.24	2252	7789	16	22.3319	3868	3084.26	49	475.706	3.57346
ENSRNOG00000001238		1634	994.877	5347	1969.72	107	610.939	2000	8078.65	199	454.963	3.38414		418	432.94	268	907.316	127	136.575	39	924.236	0	0.801152	2.68158		173	313.483	817	2827.96	5992	7872.66	1608	1282.65	4	47.5706	3.3925
ENSRNOG00000001243		283	172.81	1255	462.596	14	84.8527	60	246.276	648	1476.36	2.68893		22	23.7652	73	249.596	173	185.657	13	323.483	161	129.787	2.26116		58	106.296	48	169.401	60	80.1322	68	55.005	35	342.508	2.17802
ENSRNOG00000001247		2486	1513.31	2519	928.139	59	339.411	285	1154.67	182	416.291	2.9397		656	678.858	492	1662.85	1265	1350.82	19	462.118	278	223.521	2.94232		762	1374.64	178	618.833	36	48.6048	76	61.3824	27	266.395	2.67575
ENSRNOG00000001285		2753	1675.77	240	88.7625	177	1006.92	87	355.283	1095	2493.2	3.05076		2548	2633.8	511	1726.94	3	4.26798	0	23.1059	2169	1738.5	3.08825		1789	3224.91	55	193.601	2564	3369.49	617	492.653	80	770.643	3.2069
ENSRNOG00000001352		3072	1869.88	4235	1560.16	1459	8258.99	438	1772.38	2415	5495.96	3.57881		1155	1194.46	537	1814.63	2862	3054.81	2	69.3177	182	146.611	3.09898		281	508.059	31	110.629	13999	18391	623	497.436	154	1474.69	3.62287
ENSRNOG00000021871		1150	700.369	4097	1509.33	21	124.451	531	2147.85	2122	4829.43	3.27005		323	334.779	212	718.432	147	157.915	0	23.1059	132	106.553	2.42839		947	1707.94	123	428.689	7	10.5091	29	23.9152	292	2787.64	2.9964
ENSRNOG00000025612		4005	2437.6	2163	797.021	7	45.2548	18	76.7088	512	1166.98	2.95651		1460	1509.61	260	880.332	2472	2638.68	22	531.436	856	686.587	3.09668		1943	3502.36	331	1147.78	921	1211.18	4050	3229.35	188	1798.17	3.33801
ENSRNOG00000030478		16087	9789.34	15553	5728.68	5366	30360.3	4845	19564.8	2660	6053.29	4.15531		17275	17850.8	3937	13282.6	5964	6364.63	820	18969.9	46667	37388.1	4.27349		3576	6444.42	2203	7619.6	49906	65560	9447	7531.7	254	2426.1	4.25325
ENSRNOG00000043866		46528	28312.3	40373	14870.1	8139	46046.7	8623	34817.7	7185	16346.8	4.44838		47801	49392.3	7966	26872.1	15845	16907.6	1199	27727.1	62385	49980.7	4.53372		2833	5105.81	5882	20338.5	79832	104872	29796	23753.4	879	8372.42	4.51173
ENSRNOG00000030644		1502	914.556	3205	1180.8	544	3082.98	685	2769.59	894	2035.96	3.30033		3167	3273.4	966	3261.61	5	6.40197	5	138.635	2134	1710.46	3.22482		46	84.6764	353	1223.84	18251	23976.6	2365	1886.11	109	1046.55	3.75155
ENSRNOG00000031033		1496	910.905	1068	393.722	182	1035.2	415	1679.52	648	1476.36	3.04105		2065	2134.73	457	1544.8	1350	1441.51	6	161.741	8022	6427.64	3.3696		282	509.86	380	1317.18	5193	6823.06	1031	822.683	1	19.0282	3.27838
ENSRNOG00000034234		21957	13361.2	14788	5446.92	5846	33075.6	5099	20590.3	4465	10159.3	4.21818		22408	23154.5	5399	18213.8	3256	3475.2	602	13932.9	36413	29173.1	4.24526		1448	2610.56	2465	8525.38	59453	78101.3	7754	6182.08	461	4395.52	4.30023
ENSRNOG00000032882		358	218.447	169	62.6125	118	673.164	94	383.544	82	188.81	2.48475		467	483.57	127	431.734	91	98.1636	3	92.4236	816	654.541	2.54665		15	28.826	35	124.458	1622	2132.04	261	208.859	15	152.226	2.72369
ENSRNOG00000030371		2303	1401.95	2082	767.188	716	4055.96	93	379.507	1306	2973.18	3.2823		3071	3174.2	1039	3507.84	2313	2469.03	72	1686.73	2413	1933.98	3.40728		249	450.407	173	601.547	12334	16203.8	1105	881.674	79	761.129	3.57746
ENSRNOG00000033299		1744	1061.81	766	282.493	237	1346.33	12	52.485	272	621.025	2.8279		1149	1188.26	390	1318.81	468	500.421	59	1386.35	1162	931.739	3.0274		39	72.0651	243	843.549	1171	1539.59	1021	814.711	40	390.079	2.86451
ENSRNOG00000031979		8241	5015.15	6232	2295.67	2070	11715.3	947	3827.36	1007	2293.01	3.70151		5857	6052.89	1478	4988.55	2056	2194.81	161	3743.15	4733	3792.65	3.61851		154	279.252	1583	5476.16	11176	14682.6	3633	2896.93	155	1484.2	3.69582
ENSRNOG00000030700		5409	3291.92	1604	591.136	1262	7144.59	819	3310.59	1148	2613.76	3.53025		5526	5710.88	1026	3463.99	1000	1068.06	135	3142.4	4807	3851.94	3.5375		129	234.211	1082	3744.11	9239	12138.1	2437	1943.51	45	437.649	3.56814
ENSRNOG00000029971		2027	1234.01	4169	1535.85	299	1697.05	641	2591.95	97	222.932	3.16327		1693	1750.36	497	1679.71	1086	1159.82	168	3904.9	1946	1559.84	3.3034		7	14.413	46	162.487	1060	1393.77	4670	3723.6	3	38.0565	3.02795
ENSRNOG00000031766		1897	1154.91	569	209.936	600	3399.76	856	3459.97	319	727.941	3.25298		2631	2719.56	933	3150.31	1336	1426.57	5	138.635	6537	5237.93	3.40391		30	55.8504	418	1448.55	5311	6978.07	979	781.23	3	38.0565	3.2696
ENSRNOG00000058328		58	35.9007	113	41.9872	4	28.2842	17	72.6715	24	56.8704	1.67342		43	45.4638	15	53.9667	98	105.633	0	23.1059	37	30.4438	1.71368		15	28.826	14	51.8575	31	42.0366	65	52.6135	4	47.5706	1.64915
ENSRNOG00000055987		172	105.268	577	212.883	45	260.215	248	1005.29	70	161.512	2.54287		44	46.4971	10	37.1021	4536	4840.96	22	531.436	329	264.38	3.05845		189	342.309	294	1019.86	611	803.949	811	647.305	37	361.536	2.80277
ENSRNOG00000055717		132	80.9288	8	3.31478	4	28.2842	49	201.865	10	25.023	1.83176		12	13.4325	4	16.8646	559	597.518	165	3835.58	34	28.0403	2.95341		1	3.60325	14	51.8575	107	141.873	54	43.8445	6	66.5988	1.78927

## Sheet: Fig.8-S2F
	Condition	CRISPR_CTRL						CRISPR_MDGA1
Gene	Cell #	1	2	3	4	5		1	2	3	4	5
Vangl2		11.1711	1.77953	1	1	1		9.41463	16.6235	38.3554	1	2.73934
Tbxas1		1	1	1	1	1		1	1	1	1	1
Tfb2m		1	1	3.73514	1	1		1	1	1	1	1
Scg2		1346.45	1024.72	1352.16	3878.86	729.799		2519.78	1699.16	864.982	1	1992.55
Nyap2		28.6445	2.94883	1	40.3192	71.6489		28.1138	1	22.0817	25.8428	24.771
Galnt18		1.2608	1.58465	1	2.6383	1		1.8796	4.25127	2.347	1.41536	12.5458
Ttc7b		1	34.52	1	1	285.455		23.439	95.9429	1.36986	1	7.95738
Srbd1		212.506	13.6674	66.6433	1	1		185.654	3.40362	277.652	9.28094	1
Slc9a9		1	210.305	6.47027	1	1		1	2.20181	1.36986	25.8428	16.0743
Adora1		1	1	72.1135	1	1.92959		3.63879	1	1	1	93.3667
Statistical test
Mann-Whitney
	Discovery?	P value	Mean rank of Control	Mean rank of MDGA1_KO	Mean rank diff.	Mann-Whitney U	q value
Vangl2	No	0.174603	4.1	6.9	-2.8	5.5	0.881746
Tbxas1	No	>0.999999	5.5	5.5	0	12.5	>0.999999
Tfb2m	No	>0.999999	6	5	1	10	>0.999999
Scg2	No	>0.999999	5.4	5.6	-0.2	12	>0.999999
Nyap2	No	0.460317	6.3	4.7	1.6	8.5	>0.999999
Galnt18	No	0.087302	3.8	7.2	-3.4	4	0.881746
Ttc7b	No	0.68254	5.1	5.9	-0.8	10.5	>0.999999
Srbd1	No	0.833333	5.2	5.8	-0.6	11	>0.999999
Slc9a9	No	0.555556	4.9	6.1	-1.2	9.5	>0.999999
Adora1	No	0.84127	5.3	5.7	-0.4	11.5	>0.999999

## Sheet: Fig.8-S2G
		CRISPR_CTRL							CRISPR_MDGA2
Gene	Cell #	1	2	3	4	5	6		1	2	3	4	5
Pex1		203.639	2.36418	1	1	1	25.3669		54.6553	1	56.2271	8.4765	87.5937
Ssbp2		49.2475	1	3.73514	1	6.57755	4.67172		1.8796	1	1	1	12.5458
Prune2		16.9086	135.47	1	1	355.174	1		3.63879	30.2615	1	2.66145	901.575
Crygs		1	1	1	1	1	1		1	1	1	1	1
Ift80		2.30399	1.19488	1	1	1	1.1669		1	5.80723	1	61.2274	1
Ccdc178		1	1.19488	1	4.2766	1	1.1669		1	1	1	1	1
U6		1	1	1	1	1	1		1	1	1	1	1
Tmem47		3.86877	1.19488	1	1	32.8772	32.8772		3.63879	1	33.3281	1	151.096
Camk2b		973.513	1104.43	922.741	767.725	164.608	854.175		1893.89	41.6409	1089.38	3897.09	595.61
Samd4a		3.60797	3.3386	17.4108	5.9149	1.92959	2.83586		1.8796	4.25127	3.0205	1.41536	6.77292
Statistical test
Mann-Whitney
		Discovery?	P value	Mean rank of Control	Mean rank of MDGA2_KO	Mean rank diff.	Mann-Whitney U	q value
Pex1		No	0.344156	5.083	7.1	-2.017	9.5	>0.999999
Ssbp2		No	0.393939	6.833	5	1.833	10	>0.999999
Prune2		No	0.670996	5.583	6.5	-0.9167	12.5	>0.999999
Crygs		No	>0.999999	6	6	0	15	>0.999999
Ift80		No	0.837662	5.75	6.3	-0.55	13.5	>0.999999
Ccdc178		No	0.181818	7.25	4.5	2.75	7.5	>0.999999
U6		No	>0.999999	6	6	0	15	>0.999999
Tmem47		No	0.744589	5.667	6.4	-0.7333	13	>0.999999
Camk2b		No	0.662338	5.5	6.6	-1.1	12	>0.999999
Samd4a		No	0.536797	6.667	5.2	1.467	11	>0.999999
