# Supplementary material for: MDGAs are fast-diffusing molecules that delay excitatory synapse development by altering neuroligin behavior
Source: eLife. 2022 May 9;11:e75233. doi: 10.7554/eLife.75233 (PMC9084894; doi:10.7554/eLife.75233)
Supplement: Figure 8—figure supplement 3—source data 1. — Each graph (B,C,D,E) is shown in a separate sheet within the file. [file elife-75233-fig8-figsupp3-data1.xlsx]

## Sheet: Fig.8-S3B
CRISPR CTRL	CRISPR MDGA1	CRISPR MDGA2
0.442515	0.625139	0.726707
0.358021	1.41366	0.31115
0.572261	0.451516	0.339387
0.335323	0.331737	0.471065
0.33385	0.148049	0.498482
0.510586	0.575662	0.992432
0.46197	0.47227	0.708431
0.658358	0.491243	0.352307
0.451869	0.523505	0.852002
0.6589	0.492412	0.45519
1.23458	0.475925	0.34057
0.855057	0.284791	0.598069
1.14226	0.246599	0.532476
1.5468	0.645075	0.353064
0.685517	0.42041	0.658712
1.09487	0.708608	0.764116
0.539887	0.575516	0.500586
1.09581	0.833386	0.520548
0.640128	0.479961	0.377831
0.398868	0.604821	0.714351
0.742097	0.371274	0.560164
0.765785	1.19245	0.397291
0.987882	0.377679	0.430418
0.763722	0.33672	0.374948
0.749326	0.439824	0.772451
0.652579	0.559269	0.737197
0.861592	0.486746	0.547267
0.993804	0.539702	0.71723
1.32192	0.265219	0.687291
0.815185	0.442201	0.366828
0.524244	0.69472	0.805212
0.632323	0.183243	1.06224
0.619199	0.543359	0.75062
0.789219	1.3294	0.652313
0.442986	0.792374	0.808206
0.931377	0.625888	0.821625
0.648549	0.451024	0.796543
0.62022	1.3415	0.359644
0.983029	0.854315	0.299506
0.786272	0.477565	0.82073
0.82408	0.545724	0.462442
0.448307	0.7073	0.744417
0.443239	0.839487	0.434236
0.571193	1.18608	1.03247
0.306252	0.394362	0.620706
0.318658	0.718613	0.770143
0.332313	0.798379	0.286592
0.334323	0.527456	0.7108
0.826222	0.430972	0.569478
0.443106	0.513575	0.788252
0.39606	0.382448	0.746512
0.422746	0.720513	0.584384
0.502651	1.33787	0.63834
0.598505	0.595027	0.404959
0.619991	0.646527	0.560531
0.523538	0.932886	0.741699
0.750437	0.542587	0.777546
1.21241	0.979087	0.332596
0.559524	0.651647	0.761683
0.306485	0.463028	0.372019
0.614381	0.639396	1.1641
0.772048	0.684819	0.889573
0.300998	0.968167	0.751548
0.769921	1.5193	0.764446
0.68956	1.05908	0.785189
1.46585	0.444329	0.374069
0.707779	1.33829	1.16953
0.778262	0.783397	0.508087
0.740708	0.89629	0.423548
0.765665	0.690033	0.532294
0.395111	0.799724	0.744417
0.345579	1.00453	0.434236
0.607024	1.15462	1.03247
0.220981	0.577603	0.620706
0.698113	0.527493	0.770143
0.811602	0.415103	0.286592
0.666715	0.695942	0.7108
0.430059	0.82762	0.569478
0.520509	0.718237	0.788252
0.540866	0.585698	0.746512
0.448307	0.390308	0.584384
0.443239	0.477565	0.63834
0.571193	0.545724	0.404959
0.306252	0.7073	0.560531
0.318658	0.839487	0.741699
0.332313	1.18608	0.777546
0.334323	0.394362	0.332596
0.826222	0.718613	0.761683
0.443106	0.798379	0.372019
0.39606	0.527456	1.1641
0.422746	0.430972	0.889573
0.502651	0.513575	0.751548
0.598505	0.382448	0.764446
0.619991	0.720513	0.785189
0.523538	1.33787	0.374069
0.750437	0.595027	1.16953
1.21241	0.646527	0.508087
0.559524	0.932886	0.423548
0.306485	0.542587	0.532294
0.614381	0.979087
0.772048	0.651647
0.300998	0.463028
0.769921	0.639396
0.68956	0.684819
1.46585	0.968167
0.707779	1.5193
0.778262	1.05908
0.740708	0.444329
0.765665	1.33829
0.395111	0.783397
0.345579	0.89629
0.607024	0.690033
0.220981	0.799724
0.698113	1.00453
0.811602	1.15462
0.666715	0.577603
0.430059	0.527493
0.520509	0.415103
0.540866	0.695942
	0.82762
	0.718237
	0.585698
	0.390308
DescriptiveStatistics
	CRISPR CTRL	CRISPR MDGA1	CRISPR MDGA2
Number of values	119	123	99
Minimum	0.221	0.148	0.2866
Maximum	1.547	1.519	1.17
Range	1.326	1.371	0.8829
Mean	0.6386	0.6898	0.6341
Std. Deviation	0.2678	0.2936	0.2184
Std. Error of Mean	0.02454	0.02647	0.02195
Kruskal Wallis test
Number of families	1
Number of comparisons per family	2
Alpha	0.05
Dunn's multiple comparisons test	Mean rank diff,	Significant?	Summary	Adjusted P Value	A-?
CRISPR CTRL vs. CRISPR MDGA1	-16.83	No	ns	0.3686	B	CRISPR MDGA1
CRISPR CTRL vs. CRISPR MDGA2	-5.692	No	ns	>0,9999	C	CRISPR MDGA2
Test details	Mean rank 1	Mean rank 2	Mean rank diff,	n1	n2	Z
CRISPR CTRL vs. CRISPR MDGA1	163.3	180.1	-16.83	119	123	1.328
CRISPR CTRL vs. CRISPR MDGA2	163.3	169	-5.692	119	99	0.4245

## Sheet: Fig.8-S3C
CRISPR CTRL	CRISPR MDGA1	CRISPR MDGA2
0.394272	0.521334	0.366017
0.488419	0.361164	0.443437
0.544862	0.365523	0.360503
0.376475	0.310307	0.413145
0.505597	0.641719	0.539451
0.488484	0.424701	0.540395
0.370838	0.462037	0.347574
0.539872	0.43808	0.4107
0.38988	0.355084	0.38295
0.56129	0.408687	0.480861
0.47175	0.405979	0.386891
0.363763	0.359825	0.39739
0.316801	0.320634	0.390165
0.378683	0.241588	0.299876
0.339368	0.309581	0.339398
0.402802	0.286838	0.318915
0.358982	0.325138	0.255618
0.318091	0.400588	0.257206
0.35677	0.34225	0.568991
0.315188	0.442717	0.359362
0.419501	0.462037	0.375468
0.384081	0.325613	0.376475
0.402486	0.315923	0.343961
0.494361	0.470143	0.241205
0.280645	0.441814	0.356125
0.594048	0.297758	0.408366
0.592241	0.441665	0.5106
0.460785	0.286476	0.371442
0.301658	0.315631	0.426346
0.557379	0.664686	0.368178
0.363437	0.375295	0.678277
0.510036	0.271661	0.280645
0.37341	0.586714	0.328346
0.578022	0.343518	0.3404
0.407471	0.317032	0.466578
0.325915	0.407962	0.330563
0.378863	0.523357	0.470277
0.374871	0.221778	0.346606
0.610149	0.282832	0.586289
0.444497	0.506679	0.290495
0.459185	0.539702	0.319693
0.385348	0.51093	0.310877
0.32856	0.480128	0.451444
0.431818	0.409749	0.486484
0.316953	0.414611	0.377045
0.433517	0.545699	0.480706
0.457534	0.432946	0.367699
0.334197	0.426257	0.420034
0.309655	0.471816	0.358462
0.435146	0.42518	0.357807
0.60179	0.423738	0.280275
0.401117	0.321715	0.453341
0.70949	0.524783	0.458173
0.442717	0.421116	0.322118
0.350073	0.377743	0.577409
0.404874	0.37186	0.487299
0.418034	0.414891	0.40164
0.396477	0.434346	0.438936
0.338447	0.382515	0.524783
0.469084	0.590381	0.556869
0.339139	0.368326	0.643858
0.355696	0.38824	0.335645
0.554017	0.543797	0.353658
0.4107	0.442643	0.313501
0.428882	0.392447	0.43772
0.339398	0.452486	0.298043
0.442358	0.337972	0.36963
0.383099	0.278768	0.370252
0.430924	0.297494	0.376475
0.317804	0.369372	0.385809
0.482192	0.386254	0.323997
0.391876	0.521273	0.451444
0.441665	0.434657	0.486484
0.621754	0.414123	0.377045
0.519242	0.344988	0.480706
0.38717	0.417117	0.367699
0.473984	0.297884	0.420034
0.45737	0.33827	0.358462
0.407278	0.27984	0.357807
0.470023	0.351662	0.280275
0.385348	0.383556	0.453341
0.32856	0.440556	0.458173
0.431818	0.539702	0.322118
0.316953	0.51093	0.577409
0.433517	0.480128	0.487299
0.457534	0.409749	0.40164
0.334197	0.414611	0.438936
0.309655	0.545699	0.524783
0.435146	0.432946	0.556869
0.60179	0.426257	0.643858
0.401117	0.471816	0.335645
0.70949	0.42518	0.353658
0.442717	0.423738	0.313501
0.350073	0.321715	0.43772
0.404874	0.524783	0.298043
0.418034	0.421116	0.36963
0.396477	0.377743	0.370252
0.338447	0.37186	0.376475
0.469084	0.414891	0.385809
0.339139	0.434346	0.323997
0.355696	0.382515
0.554017	0.590381
0.4107	0.368326
0.428882	0.38824
0.339398	0.543797
0.442358	0.442643
0.383099	0.392447
0.430924	0.452486
0.317804	0.337972
0.482192	0.278768
0.391876	0.297494
0.441665	0.369372
0.621754	0.386254
0.519242	0.521273
0.38717	0.434657
0.473984	0.414123
0.45737	0.344988
0.407278	0.417117
0.470023	0.297884
	0.33827
	0.27984
	0.351662
	0.383556
	0.440556
Descriptive Statistics
	CRISPR CTRL	CRISPR MDGA1	CRISPR MDGA2
Number of values	119	124	100
Minimum	0.2806	0.2218	0.2412
Maximum	0.7095	0.6647	0.6783
Range	0.4288	0.4429	0.4371
Mean	0.4272	0.4063	0.404
Std. Deviation	0.08744	0.08496	0.09071
Std. Error of Mean	0.008016	0.007629	0.009071
Kruscal Wallis test
Number of families	1
Number of comparisons per family	2
Alpha	0.05
Dunn's multiple comparisons test	Mean rank diff,	Significant?	Summary	Adjusted P Value	A-?
CRISPR CTRL vs. CRISPR MDGA1	21.23	No	ns	0.1904	B	CRISPR MDGA1
CRISPR CTRL vs. CRISPR MDGA2	28.65	No	ns	0.0663	C	CRISPR MDGA2
Test details	Mean rank 1	Mean rank 2	Mean rank diff,	n1	n2	Z
CRISPR CTRL vs. CRISPR MDGA1	188	166.8	21.23	119	124	1.668
CRISPR CTRL vs. CRISPR MDGA2	188	159.4	28.65	119	100	2.13

## Sheet: Fig.8-S3D
CRISPR CTRL	CRISPR MDGA1	CRISPR MDGA2
0.60182	0.610601	1.0295
0.835382	1.52526	0.595244
0.743939	0.366711	0.41932
0.586815	0.619242	0.790717
0.129802	0.33311	1.0207
0.709839	0.44483	0.914594
0.67684	0.47227	0.850117
0.736734	0.491243	0.369922
0.451869	0.763445	0.94411
0.578546	0.926894	0.409671
0.773916	0.771326	0.399799
0.950064	0.407944	0.631295
0.991395	0.622988	0.97367
0.457656	0.910694	0.437127
1.0203	0.821711	0.658712
1.09487	1.02917	0.677284
0.958765	0.778639	0.547516
1.2054	0.814446	0.804484
0.973529	0.651375	0.519518
0.797737	0.799924	0.850418
1.09768	0.515659	0.576639
0.96489	1.34151	0.587991
0.0346658	0.813463	0.817794
0.781079	0.443052	0.589204
0.749326	0.679728	0.876837
0.614192	0.820262	1.1058
0.958868	0.579459	0.828296
0.0795044	0.479735	1.31333
1.32192	0.41832	0.62481
0.956592	0.362931	0.767005
0.689529	0.53369	0.805212
0.920047	0.60788	0.879668
0.993469	0.680618	0.933203
0.915598	0.724478	0.865313
0.920933	0.746328	0.946192
1.05161	0.919154	0.699903
1.07832	0.39118	0.955852
0.95227	0.595351	0.594195
0.57864	0.633485	0.527702
0.405203	0.910031	0.839383
0.430874	0.657022	0.712931
0.551921	0.785934	0.0972153
0.61051	0.641484	0.214771
0.314596	1.25937	0.505901
0.515074	0.715217	0.402586
0.356047	0.341323	0.594178
0.663571	0.56044	0.315913
0.171098	0.675964	0.514293
0.2992	0.274932	0.547347
0.628197	0.596207	0.618826
0.908605	0.687675	0.566274
0.217271	0.704737	0.467629
0.524455	0.469287	0.613234
0.806837	0.607278	0.434119
0.706633	0.620229	0.307456
0.700153	0.539845	0.954215
0.597506	0.556713	0.895802
0.705831	0.511834	0.427462
1.23556	0.407566	0.631473
0.878548	0.604914	0.451466
1.36443	0.462329	0.565774
0.872685	1.16393	0.613371
1.12763	0.582724	0.673678
0.735313	0.476532	0.707431
0.966526	0.351575	0.774394
1.17678	0.0722367	1.25821
0.664978	0.905998	1.00166
0.800329	0.253456	0.945836
1.02635	0.494052	0.51273
0.925683	0.808368	0.506657
1.11538	1.10385	0.456912
1.55269	0.655402	0.891229
0.444268	0.571384	0.331511
0.899813	0.45216	0.34758
0.330577	0.445857	0.454483
0.46005	0.315729	1.14929
0.410958	0.66945	0.518372
	0.681077	0.837017
	0.984244	0.637976
		0.735596
		0.966799
		0.634346
		0.753434
		0.468479
		1.15889
Descriptive staticts
	CRISPR CTRL	CRISPR MDGA1	CRISPR MDGA2
Number of values	77	79	85
Minimum	0.03467	0.07224	0.09722
Maximum	1.553	1.525	1.313
Range	1.518	1.453	1.216
Mean	0.7537	0.6459	0.6842
Std. Deviation	0.309	0.2495	0.2436
Std. Error of Mean	0.03522	0.02807	0.02642
Kruskal Wallis test
Number of families	1
Number of comparisons per family	2
Alpha	0.05
Dunn's multiple comparisons test	Mean rank diff,	Significant?	Summary	Adjusted P Value	A-?
CRISPR CTRL vs. CRISPR MDGA1	31.47	Yes	**	0.0096	B	CRISPR MDGA1
CRISPR CTRL vs. CRISPR MDGA2	19.32	No	ns	0.1564	C	CRISPR MDGA2
Test details	Mean rank 1	Mean rank 2	Mean rank diff,	n1	n2	Z
CRISPR CTRL vs. CRISPR MDGA1	138.1	106.7	31.47	77	79	2.819
CRISPR CTRL vs. CRISPR MDGA2	138.1	118.8	19.32	77	85	1.761

## Sheet: Fig.8-S3E
CRISPR CTRL	CRISPR MDGA1	CRISPR MDGA2
0.448951	0.823845	0.428148
0.41233	0.405691	0.506374
0.402802	0.542167	0.470594
0.794858	0.37892	0.447838
0.750505	0.292814	0.390006
0.430214	0.384528	0.597117
0.443295	0.462037	0.413869
0.541183	0.43808	0.41233
0.560638	0.297269	0.528401
0.679747	0.372197	0.587529
0.400921	0.468227	0.559008
0.677655	0.397785	0.380078
0.449389	0.370771	0.397866
0.451993	0.253835	0.45019
0.485032	0.375679	0.541896
0.523536	0.332712	0.471252
0.653598	0.316209	0.461549
0.561212	0.433782	0.378488
0.464616	0.402594	0.482261
0.475728	0.457446	0.412069
0.492647	0.447663	0.441991
0.498164	0.428446	0.3626
0.521058	0.425368	0.440422
0.642669	0.600991	0.539303
0.763062	0.443918	0.527228
0.580969	0.522709	0.451148
0.638371	0.454508	0.471205
0.526209	0.333694	0.423221
0.56129	0.583381	0.370108
0.422715	0.625264	0.418686
0.41012	0.534888	0.549088
0.474647	0.382587	0.375791
0.487397	0.383057	0.490128
0.446193	0.376475	0.419628
0.451342	0.328346	0.428076
0.431378	0.346381	0.411413
0.473562	0.447207	0.494774
0.47915	0.372327	0.454778
0.378614	0.297959	0.568315
0.541018	0.558776	0.433825
0.436577	0.326207	0.447207
0.513375	0.370058	0.393125
0.695501	0.447777	0.226741
0.456333	0.425857	0.24642
0.484854	0.510523	0.449032
0.523643	0.297494	0.38332
0.417038	0.620157	0.394538
0.280645	0.633714	0.34225
0.352781	0.449203	0.347515
0.290913	0.369394	0.39644
0.392032	0.424862	0.413634
0.470966	0.332314	0.402403
0.612891	0.387883	0.539547
0.595515	0.455547	0.395577
0.41796	0.438301	0.363866
0.447609	0.403855	0.305743
0.551938	0.330516	0.411089
0.511236	0.437319	0.415164
0.504543	0.272431	0.361376
0.46805	0.492156	0.32569
0.441503	0.394728	0.325881
0.454578	0.327277	0.340294
0.382387	0.546399	0.404362
0.378757	0.363407	0.508677
0.377844	0.298898	0.426844
0.333286	0.435146	0.391686
0.516527	0.400669	0.401693
0.577177	0.290913	0.390419
0.490558	0.519079	0.34225
0.81215	0.352781	0.272244
0.624866	0.372137	0.412713
0.452935	0.292542	0.412069
0.486183	0.421231	0.347139
0.475459	0.386382	0.382994
0.443784	0.258969	0.322998
0.42496	0.352872	0.211054
0.373215	0.550642	0.339005
0.418598	0.383915	0.291465
0.350303	0.409254	0.407895
		0.653747
		0.491332
		0.50811
		0.2886
		0.425443
		0.278934
		0.314029
Descriptive Statistics
	CRISPR CTRL	CRISPR MDGA1	CRISPR MDGA2
Number of values	79	79	86
Minimum	0.2806	0.2538	0.2111
Maximum	0.8122	0.8238	0.6537
Range	0.5315	0.57	0.4427
Mean	0.4945	0.4162	0.4168
Std. Deviation	0.1085	0.09971	0.08386
Std. Error of Mean	0.0122	0.01122	0.009043
Kruskal Wallis test
Number of families	1
Number of comparisons per family	2
Alpha	0.05
Dunn's multiple comparisons test	Mean rank diff,	Significant?	Summary	Adjusted P Value	A-?
CRISPR CTRL vs. CRISPR MDGA1	57.65	Yes	****	<0,0001	B	CRISPR MDGA1
CRISPR CTRL vs. CRISPR MDGA2	51.83	Yes	****	<0,0001	C	CRISPR MDGA2
Test details	Mean rank 1	Mean rank 2	Mean rank diff,	n1	n2	Z
CRISPR CTRL vs. CRISPR MDGA1	159.4	101.8	57.65	79	79	5.133
CRISPR CTRL vs. CRISPR MDGA2	159.4	107.6	51.83	79	86	4.712
