# Supplementary material for: MDGAs are fast-diffusing molecules that delay excitatory synapse development by altering neuroligin behavior
Source: eLife. 2022 May 9;11:e75233. doi: 10.7554/eLife.75233 (PMC9084894; doi:10.7554/eLife.75233)
Supplement: Figure 8—figure supplement 4—source data 1. — Each graph (B,C,E,F) is shown in a separate sheet within the file. [file elife-75233-fig8-figsupp4-data1.xlsx]

## Sheet: Fig.8-S4B
CRISPR CTRL	CRSIPR MDGA1	CRISPR MDGA2
0.224107	0.152135	0.454424
0.172047	0.200934	0.353469
0.36611	0.322672	0.387301
0.589282	0.154938	0.575494
0.486309	0.183092	0.403639
0.115292	0.474166	0.345298
0.206941	0.296173	0.356341
0.130851	0.271751	0.504494
0.416415	0.270074	0.328933
0.8039	0.396481	0.267678
0.276027	0.398369	0.354426
0.26149	0.187977	0.172516
0.248108	0.444295	0.419895
0.208753	0.476863	0.466522
0.396172	0.307471	0.279211
0.304032	0.117102	0.71283
0.358071	0.373453	0.267698
0.41004	0.222725	0.137054
0.270539	0.510112	0.403644
	0.431982	0.26889
		0.393308
0.325623	0.40562	0.260513
0.220541	0.306734	0.259316
0.379679	0.314829	0.256956
0.292037	0.540406	0.461381
0.339778	0.861567	0.571449
0.529979		0.100992
0.423106		0.260238
0.594153		0.244395
0.667011		0.300429
0.171628		0.530715
		0.426231
		0.386839
0.168004
0.207909	0.462164	0.46605
0.293574	0.464087	0.337666
0.227639	0.191045	0.276948
0.576069	0.262384	0.222752
0.236457	0.187028	0.245446
0.236068	0.192856	0.254251
0.235088	0.518953
0.200185	0.17369
0.471625
Descriptive Statistics
	CRISPR CTRL	CRSIPR MDGA1	CRISPR MDGA2
Number of values	39	33	39
Minimum	0.1153	0.1171	0.101
Maximum	0.8039	0.8616	0.7128
Range	0.6886	0.7445	0.6118
Mean	0.3344	0.3356	0.3517
Std. Deviation	0.1586	0.1568	0.1269
Std. Error of Mean	0.0254	0.02729	0.02033
Normality Test
	CRISPR CTRL	CRSIPR MDGA1	CRISPR MDGA2
Test for normal distribution
Anderson-Darling test
A2*	1.134	0.6735	0.485
P value	0.005	0.0715	0.2146
Passed normality test (alpha=0.05)?	No	Yes	Yes
P value summary	**	ns	ns
D'Agostino & Pearson test
K2	8.454	11.23	3.239
P value	0.0146	0.0036	0.198
Passed normality test (alpha=0.05)?	No	No	Yes
P value summary	*	**	ns
Shapiro-Wilk test
W	0.9127	0.9077	0.968
P value	0.0052	0.0085	0.3248
Passed normality test (alpha=0.05)?	No	No	Yes
P value summary	**	**	ns
Kolmogorov-Smirnov test
KS distance	0.14	0.1086	0.1262
P value	0.0523	>0,1000	>0,1000
Passed normality test (alpha=0.05)?	Yes	Yes	Yes
P value summary	ns	ns	ns
Number of values	39	33	39
ANOVA Kruskal Wallis
Table Analyzed	gephyrin density
Kruskal-Wallis test
P value	0.5809
Exact or approximate P value?	Approximate
P value summary	ns
Do the medians vary signif. (P < 0.05)?	No
Number of groups	3
Kruskal-Wallis statistic	1.086
Data summary
Number of treatments (columns)	3
Number of values (total)	111
Number of families	1
Number of comparisons per family	3
Alpha	0.05
Dunn's multiple comparisons test	Mean rank diff,	Significant?	Summary	Adjusted P Value
CRISPR CTRL vs. CRSIPR MDGA1	-1.657	No	ns	>0,9999	A-B
CRISPR CTRL vs. CRISPR MDGA2	-7.282	No	ns	0.9533	A-C
CRSIPR MDGA1 vs. CRISPR MDGA2	-5.625	No	ns	>0,9999	B-C
Test details	Mean rank 1	Mean rank 2	Mean rank diff,	n1	n2	Z
CRISPR CTRL vs. CRSIPR MDGA1	52.95	54.61	-1.657	39	33	0.2177
CRISPR CTRL vs. CRISPR MDGA2	52.95	60.23	-7.282	39	39	0.9991
CRSIPR MDGA1 vs. CRISPR MDGA2	54.61	60.23	-5.625	33	39	0.7388

## Sheet: Fig.8-S4C
CRISPR CTRL	CRSIPR MDGA1	CRISPR MDGA2
0.39701	0.229796	0.34062
0.308025	0.21904	0.313729
0.349331	0.352029	0.584845
0.315188	0.402144	0.305091
0.293052	0.280217	0.428446
0.17797	0.264359	0.459756
0.277603	0.329268	0.461137
0.2738	0.286963	0.322285
0.280424	0.311828	0.224602
0.279943	0.284801	0.448951
0.214357	0.240755	0.277749
0.283579	0.311828	0.290913
0.252885	0.334916	0.312746
0.23713	0.407589	0.267577
0.443556	0.223779	0.247724
0.295802	0.260966	0.363009
0.327039	0.290279	0.452259
0.30558	0.224174	0.302321
0.260637	0.251554	0.355288
	0.277009	0.476298
		0.384081
0.391448	0.511745	0.385982
0.264021	0.412126	0.329416
0.254786	0.674721	0.269693
0.357461	0.320859	0.377512
0.316078	0.222763	0.26049
0.252885		0.330842
0.223207		0.24202
0.454432		0.245798
0.258881		0.241286
0.209628		0.254786
		0.267462
		0.278216
0.544967
0.337361	0.352945	0.247561
0.340111	0.400921	0.317359
0.403855	0.403855	0.320248
0.375468	0.553552	0.39701
0.277403	0.248131	0.325138
0.296617	0.510264	0.308025
0.463178	0.398675
0.4107	0.265244
0.320737
Descriptie Statistics
	CRISPR CTRL	CRSIPR MDGA1	CRISPR MDGA2
Number of values	39	33	39
Minimum	0.178	0.219	0.2246
Maximum	0.545	0.6747	0.5848
Range	0.367	0.4557	0.3602
Mean	0.3161	0.3351	0.3338
Std. Deviation	0.07816	0.1075	0.08148
Std. Error of Mean	0.01252	0.01871	0.01305
Normality Test
	CRISPR CTRL	CRSIPR MDGA1	CRISPR MDGA2
Test for normal distribution
Anderson-Darling test
A2*	0.7022	1.259	1.001
P value	0.0615	0.0024	0.0109
Passed normality test (alpha=0.05)?	Yes	No	No
P value summary	ns	**	*
D'Agostino & Pearson test
K2	6.246	13.01	8.377
P value	0.044	0.0015	0.0152
Passed normality test (alpha=0.05)?	No	No	No
P value summary	*	**	*
Shapiro-Wilk test
W	0.9496	0.8698	0.9142
P value	0.0798	0.001	0.0058
Passed normality test (alpha=0.05)?	Yes	No	No
P value summary	ns	***	**
Kolmogorov-Smirnov test
KS distance	0.1171	0.1466	0.1555
P value	>0,1000	0.0694	0.0184
Passed normality test (alpha=0.05)?	Yes	Yes	No
P value summary	ns	ns	*
Number of values	39	33	39
ANOVA Kruskal Wallis
Table Analyzed	gephyrin area
Kruskal-Wallis test
P value	0.6709
Exact or approximate P value?	Approximate
P value summary	ns
Do the medians vary signif. (P < 0.05)?	No
Number of groups	3
Kruskal-Wallis statistic	0.7983
Data summary
Number of treatments (columns)	3
Number of values (total)	111
Number of families	1
Number of comparisons per family	3
Alpha	0.05
Dunn's multiple comparisons test	Mean rank diff,	Significant?	Summary	Adjusted P Value
CRISPR CTRL vs. CRSIPR MDGA1	-2.883	No	ns	>0,9999	A-B
CRISPR CTRL vs. CRISPR MDGA2	-6.5	No	ns	>0,9999	A-C
CRSIPR MDGA1 vs. CRISPR MDGA2	-3.617	No	ns	>0,9999	B-C
Test details	Mean rank 1	Mean rank 2	Mean rank diff,	n1	n2	Z
CRISPR CTRL vs. CRSIPR MDGA1	52.86	55.74	-2.883	39	33	0.3788
CRISPR CTRL vs. CRISPR MDGA2	52.86	59.36	-6.5	39	39	0.8918
CRSIPR MDGA1 vs. CRISPR MDGA2	55.74	59.36	-3.617	33	39	0.4751

## Sheet: Fig.8-S4E
CRISPR CTRL	CRISPR MDGA1	CRISPR MDGA2
0.631399	1.77178	0.338095
1.3057	0.0694915	5.14286
8.40533	19.3333	27.0536
41.8439	4.76771	15.9667
1.06652	22.1588	0.0579495
5.64444	32.5307	5.86885
40.0521		2.44068
26.3708		5.2
15.9665		28.1696
Descriptive Statistics
	CRISPR CTRL	CRISPR MDGA1	CRISPR MDGA2
Number of values	9	6	9
Minimum	0.6314	0.06949	0.05795
Maximum	41.84	32.53	28.17
Range	41.21	32.46	28.11
Mean	15.7	13.44	10.03
Std. Deviation	16.56	13.16	11.01
Std. Error of Mean	5.519	5.371	3.67
ANOVA Kruskal Wallis
Table Analyzed	mIPSC frequency
Kruskal-Wallis test
P value	0.8183
Exact or approximate P value?	Approximate
P value summary	ns
Do the medians vary signif. (P < 0.05)?	No
Number of groups	3
Kruskal-Wallis statistic	0.4011
Data summary
Number of treatments (columns)	3
Number of values (total)	24
Number of families	1
Number of comparisons per family	3
Alpha	0.05
Dunn's multiple comparisons test	Mean rank diff,	Significant?	Summary	Adjusted P Value
CRISPR CTRL vs. CRISPR MDGA1	1.056	No	ns	>0,9999	A-B
CRISPR CTRL vs. CRISPR MDGA2	2.111	No	ns	>0,9999	A-C
CRISPR MDGA1 vs. CRISPR MDGA2	1.056	No	ns	>0,9999	B-C
Test details	Mean rank 1	Mean rank 2	Mean rank diff,	n1	n2	Z
CRISPR CTRL vs. CRISPR MDGA1	13.56	12.5	1.056	9	6	0.2832
CRISPR CTRL vs. CRISPR MDGA2	13.56	11.44	2.111	9	9	0.6333
CRISPR MDGA1 vs. CRISPR MDGA2	12.5	11.44	1.056	6	9	0.2832

## Sheet: Fig.8-S4F
CRISPR CTRL	CRISPR MDGA1	CRISPR MDGA2
12.4374	14.1153	9.05367
18.3432	10.7063	12.786
13.8295	7.9879	10.7555
9.5042	9.71608	15.1062
10.8142	11.261	11.8092
10.0155		13.0992
9.62593
9.93009
Descriptive Statistics
	CRISPR CTRL	CRISPR MDGA1	CRISPR MDGA2
Number of values	9	6	9
Minimum	7.763	7.988	8.154
Maximum	18.34	14.12	15.77
Range	10.58	6.127	7.614
Mean	11.36	11.18	12.33
Std. Deviation	3.154	2.259	2.639
Std. Error of Mean	1.051	0.9224	0.8796
ANOVA Kruskal Wallis
Table Analyzed	mIPSC amplitude
Kruskal-Wallis test
P value	0.5356
Exact or approximate P value?	Approximate
P value summary	ns
Do the medians vary signif. (P < 0.05)?	No
Number of groups	3
Kruskal-Wallis statistic	1.249
Data summary
Number of treatments (columns)	3
Number of values (total)	24
Number of families	1
Number of comparisons per family	3
Alpha	0.05
Dunn's multiple comparisons test	Mean rank diff,	Significant?	Summary	Adjusted P Value
CRISPR CTRL vs. CRISPR MDGA1	-0.6667	No	ns	>0,9999	A-B
CRISPR CTRL vs. CRISPR MDGA2	-3.556	No	ns	0.8584	A-C
CRISPR MDGA1 vs. CRISPR MDGA2	-2.889	No	ns	>0,9999	B-C
Test details	Mean rank 1	Mean rank 2	Mean rank diff,	n1	n2	Z
CRISPR CTRL vs. CRISPR MDGA1	11	11.67	-0.6667	9	6	0.1789
CRISPR CTRL vs. CRISPR MDGA2	11	14.56	-3.556	9	9	1.067
CRISPR MDGA1 vs. CRISPR MDGA2	11.67	14.56	-2.889	6	9	0.7752
