# Supplementary material for: MDGAs are fast-diffusing molecules that delay excitatory synapse development by altering neuroligin behavior
Source: eLife. 2022 May 9;11:e75233. doi: 10.7554/eLife.75233 (PMC9084894; doi:10.7554/eLife.75233)
Supplement: Figure 8—figure supplement 5—source data 1. — Each graph (B,C,E,F) is shown in a separate sheet within the file. [file elife-75233-fig8-figsupp5-data1.xlsx]

## Sheet: Fig.8-S5B
CRISPR CONTROL	CRISPR MDGA1	CRISPR MDGA2	CRISPR MDGA2+rescue
1.46167	1.07314	1.15845	1.4769
1.37134	0.926824	0.763108	1.61779
1.00223	0.97275	0.732974	1.36761
1.42709	1.2936	1.01713	1.35694
1.54428	1.4761	1.89376	1.07706
2.52179	1.25712	0.858538	1.07613
0.961234	1.44308	1.60812	0.0246995
1.46778	2.28007	1.35555	1.31545
1.47432	1.76248	0.993658	1.33439
	1.37082	1.10103	2.01243
	1.7024	1.67084	0.807918
	1.55064	1.10785	0.978553
	0.934301	2.17468	1.967
	1.76363	1.3389
	1.19977
Descriptive Statistics
	CRISPR CONTROL	CRISPR MDGA1	CRISPR MDGA2	CRISPR MDGA2+rescue
Number of values	9	15	14	13
Minimum	0.9612	0.9268	0.733	0.0247
Maximum	2.522	2.28	2.175	2.012
Range	1.561	1.353	1.442	1.988
Mean	1.47	1.4	1.27	1.263
Std. Deviation	0.4474	0.3744	0.4312	0.5121
Std. Error of Mean	0.1491	0.09668	0.1152	0.142
Kruskal Wallis test
Number of families	1
Number of comparisons per family	3
Alpha	0.05
Dunn's multiple comparisons test	Mean rank diff,	Significant?	Summary	Adjusted P Value	A-?
CRISPR CONTROL vs. CRISPR MDGA1	2.422	No	ns	>0,9999	B	CRISPR MDGA1
CRISPR CONTROL vs. CRISPR MDGA2	7.651	No	ns	0.6851	C	CRISPR MDGA2
CRISPR CONTROL vs. CRISPR MDGA2+rescue	5.53	No	ns	>0,9999	D	CRISPR MDGA2+rescue
Test details	Mean rank 1	Mean rank 2	Mean rank diff,	n1	n2	Z
CRISPR CONTROL vs. CRISPR MDGA1	30.22	27.8	2.422	9	15	0.3864
CRISPR CONTROL vs. CRISPR MDGA2	30.22	22.57	7.651	9	14	1.205
CRISPR CONTROL vs. CRISPR MDGA2+rescue	30.22	24.69	5.53	9	13	0.8578

## Sheet: Fig.8-S5C
CRISPR CONTROL	CRISPR MDGA1	CRISPR MDGA2	CRISPR MDGA2+rescue
0.816225	0.352089	1.20857	1.06195
0.395916	0.297375	0.351979	0.383666
0.413814	0.184222	0.637903	0.657999
0.347448	0.482132	0.820584	0.44546
0.416431	0.438624	1.29618	0.593441
0.292172	0.315589	1.00167	0.814593
0.389339	0.350535	0.755232	0.3301
0.397248	0.466784	0.230789	0.326662
0.620666	0.189807	0.868309	0.515763
	0.505339	0.971192	0.62032
	0.419643	1.72511	0.711945
	0.409961	1.12265	0.589854
	0.350523	1.66661	0.330856
	0.30723	1.35616	0.370357
	0.888594	0.689865
	0.443586	0.739322
	0.629535
Descriptive Statistics
	CRISPR CONTROL	CRISPR MDGA1	CRISPR MDGA2	CRISPR MDGA2+rescue
Number of values	9	17	16	14
Minimum	0.2922	0.1842	0.2308	0.3267
Maximum	0.8162	0.8886	1.725	1.062
Range	0.5241	0.7044	1.494	0.7353
Mean	0.4544	0.4136	0.9651	0.5538
Std. Deviation	0.1621	0.1656	0.4196	0.2142
Std. Error of Mean	0.05405	0.04016	0.1049	0.05725
Kruskal Wallis test
Number of comparisons per family	3
Alpha	0.05
Dunn's multiple comparisons test	Mean rank diff,	Significant?	Summary	Adjusted P Value	A-?
CRISPR CONTROL vs. CRISPR MDGA1	2.542	No	ns	>0,9999	B	CRISPR MDGA1
CRISPR CONTROL vs. CRISPR MDGA2	-21.03	Yes	**	0.0059	C	CRISPR MDGA2
CRISPR CONTROL vs. CRISPR MDGA2+rescue	-5.937	No	ns	>0,9999	D	CRISPR MDGA2+rescue
Test details	Mean rank 1	Mean rank 2	Mean rank diff,	n1	n2	Z
CRISPR CONTROL vs. CRISPR MDGA1	21.78	19.24	2.542	9	17	0.3782
CRISPR CONTROL vs. CRISPR MDGA2	21.78	42.81	-21.03	9	16	3.095
CRISPR CONTROL vs. CRISPR MDGA2+rescue	21.78	27.71	-5.937	9	14	0.8519

## Sheet: Fig.8-S5E
CRISPR CONTROL	CRISPR MDGA1	CRISPR MDGA2	CRISPR MDGA2+rescue
1.22881	1.13624	0.58437	1.08002
1.20974	1.34269	0.838035	1.78465
1.00864	1.73821	1.1144	1.63757
1.46268	0.885638	1.65634	1.24498
1.06933	1.02129	1.27321	1.03465
1.36932	1.21456	1.01958
1.47379	1.23107	0.974944
1.94368	1.11397	1.3596
0.893311	0.721466	1.28176
2.13093	1.23407	0.0914223
1.64709	1.34173	1.60237
	0.982129	0.935535
		1.41191
Descriptive Statistics
	CRISPR CONTROL	CRISPR MDGA1	CRISPR MDGA2	CRISPR MDGA2+rescue
Number of values	11	12	13	5
Minimum	0.8933	0.7215	0.09142	1.035
Maximum	2.131	1.738	1.656	1.785
Range	1.238	1.017	1.565	0.75
Mean	1.403	1.164	1.088	1.356
Std. Deviation	0.3855	0.2585	0.4271	0.3372
Std. Error of Mean	0.1162	0.07463	0.1185	0.1508
Kruskal Wallis test
Number of families	1
Number of comparisons per family	3
Alpha	0.05
Dunn's multiple comparisons test	Mean rank diff,	Significant?	Summary	Adjusted P Value	A-?
CRISPR CONTROL vs. CRISPR MDGA1	7.22	No	ns	0.4464	B	CRISPR MDGA1
CRISPR CONTROL vs. CRISPR MDGA2	7.79	No	ns	0.3373	C	CRISPR MDGA2
CRISPR CONTROL vs. CRISPR MDGA2+rescue	0.4364	No	ns	>0,9999	D	CRISPR MDGA2+rescue
Test details	Mean rank 1	Mean rank 2	Mean rank diff,	n1	n2	Z
CRISPR CONTROL vs. CRISPR MDGA1	25.64	18.42	7.22	11	12	1.444
CRISPR CONTROL vs. CRISPR MDGA2	25.64	17.85	7.79	11	13	1.587
CRISPR CONTROL vs. CRISPR MDGA2+rescue	25.64	25.2	0.4364	11	5	0.06754

## Sheet: Fig.8-S5F
CRISPR CONTROL	CRISPR MDGA1	CRISPR MDGA2	CRISPR MDGA2 + rescue MDGA2
0.0635228	0.500078	0.509068	0.385386
0.318784	0.237636	0.52669	0.50779
0.194063	0.529682	0.444571	0.356313
0.193726	0.410155	0.425207	0.404325
0.266179	0.396043	0.508634	0.136494
0.253137	0.125136	0.540131	0.326928
0.0962388	0.492536	0.518332	0.175726
0.156693	0.294067	0.597308	0.307931
0.322999	0.414273	0.47001	0.212842
0.317947	0.153241	0.573681	0.257898
0.115567	0.354312	0.872318	0.346708
0.266037	0.243301	0.470022	0.221779
0.423376	0.248834	0.511501	0.191461
0.334242	0.351961	0.496648	0.188605
0.346867	0.354916	0.229989	0.14227
0.335414	0.316717	0.573556	0.164623
0.118062	0.260102	0.595849	0.235801
0.240911	0.221991	0.498715	0.117039
0.465453	0.302962	0.535504
	0.592339	0.385596
	0.176352	0.278087
	0.287285	0.275932
	0.265413	0.277601
	0.0921625	0.19132
	0.335318	0.200908
	0.278889	0.255635
	0.272336
	0.194263
Descriptive Statistics
	CRISPR CONTROL	CRISPR MDGA1	CRISPR MDGA2	CRISPR MDGA2 + rescue
Number of values	20	28	26	19
Minimum	0	0.09216	0.1913	0.117
Maximum	0.4655	0.5923	0.8723	0.5078
Range	0.4655	0.5002	0.681	0.3908
Mean	0.2415	0.3108	0.4524	0.2656
Std. Deviation	0.1226	0.1215	0.1553	0.1086
Std. Error of Mean	0.02741	0.02296	0.03047	0.0249
Kruska Wallis test
Number of families	1
Number of comparisons per family	3
Alpha	0.05
Dunn's multiple comparisons test	Mean rank diff,	Significant?	Summary	Adjusted P Value	A-?
CRISPR CONTROL vs. CRISPR MDGA1	-12.15	No	ns	0.3725	B	CRISPR MDGA1
CRISPR CONTROL vs. CRISPR MDGA2	-34.67	Yes	****	<0,0001	C	CRISPR MDGA2
CRISPR CONTROL vs. CRISPR MDGA2 + rescue	-2.689	No	ns	>0,9999	D	CRISPR MDGA2 + rescue
Test details	Mean rank 1	Mean rank 2	Mean rank diff,	n1	n2	Z
CRISPR CONTROL vs. CRISPR MDGA1	33.1	45.25	-12.15	20	28	1.538
CRISPR CONTROL vs. CRISPR MDGA2	33.1	67.77	-34.67	20	26	4.319
CRISPR CONTROL vs. CRISPR MDGA2 + rescue	33.1	35.79	-2.689	20	19	0.311
