# Supplementary material for: MDGAs are fast-diffusing molecules that delay excitatory synapse development by altering neuroligin behavior
Source: eLife. 2022 May 9;11:e75233. doi: 10.7554/eLife.75233 (PMC9084894; doi:10.7554/eLife.75233)
Supplement: Figure 8—source data 1. — Each graph (B,C,D,E,G,H) is shown in a separate sheet within the file. [file elife-75233-fig8-data1.xlsx]

## Sheet: Fig.8B
CRISPR CONTROL	CRISPR MDGA1	CRISPR MDGA2	CRISPR MDGA2+rescue MDGA2
0.640543	1.16681	1.01138	0.203045		Mean +/- SEM of tabulated data
0.524698	0.972363	1.04885	0.238365
0.744041	0.876481	1.23432	0.31312
0.651128	0.944442	1.11004	0.3615
0.48382	0.597292	0.639825	0.349943
0.444374	0.775833	0.684014	0.412396
0.191113	1.75602	0.365989	0.0880442
0.477146	1.02458	1.32971	0.301113
0.885543	0.888064	0.890503	0.433144
1.03862	0.550029	0.600881	0.195869
0.340616	1.47441	0.355239	0.68948
0.233875	0.452625	0.600885	0.631893
0.353978	0.211435	0.461166	0.511023
0.215134	0.408227	0.47519	0.662504
0.21674	0.434931	0.334706	0.42764
0.49331	0.241099	0.390746	0.408016
0.394052	0.219375	0.393933	0.355762
0.262455	0.645724	0.608473
0.255388	0.343652	0.344056
0.271183	0.380784	0.519786
0.313189	0.477983	0.834374
0.262823	0.504854	0.531721
0.317976	0.321833	0.374466
0.17361	0.914188	0.361718
0.609827	0.928812	0.513114
0.217531	0.571463	0.811574
0.357385	0.517431	0.684264
0.329929	0.925075	0.410025
0.521651	0.395107	0.481257
0.644901	0.349774	0.662564
0.313693	0.654706	0.668959
0.369263	0.306548
0.551188	0.357043
0.339619	0.449698
0.361177	0.472013
0.337215	0.514974
0.247077	0.620591
0.165646	0.852509
0.243624	0.79555
0.336037	0.239205
0.233885
0.497837
0.250774
0.387281
Descriptive statistics
	CRISPR CONTROL	CRISPR MDGA1	CRISPR MDGA2	CRISPR MDGA2+rescue
Number of values	44	40	31	17
Minimum	0.1656	0.2114	0.3347	0.08804
Maximum	1.039	1.756	1.33	0.6895
Range	0.873	1.545	0.995	0.6014
Mean	0.3977	0.6383	0.6366	0.3872
Std. Deviation	0.1913	0.3424	0.2757	0.1668
Std. Error of Mean	0.02883	0.05414	0.04952	0.04046
Kruskal Wallis test
Number of families	1
Number of comparisons per family	6
Alpha	0.05
Dunn's multiple comparisons test	Mean rank diff,	Significant?	Summary	Adjusted P Value
CRISPR CONTROL vs. CRISPR MDGA1	-32.41	Yes	***	0.0006	A-B
CRISPR CONTROL vs. CRISPR MDGA2	-37.78	Yes	***	0.0002	A-C
CRISPR CONTROL vs. CRISPR MDGA2+rescue	-1.305	No	ns	>0,9999	A-D
CRISPR MDGA1 vs. CRISPR MDGA2	-5.369	No	ns	>0,9999	B-C
CRISPR MDGA1 vs. CRISPR MDGA2+rescue	31.11	Yes	*	0.0298	B-D
CRISPR MDGA2 vs. CRISPR MDGA2+rescue	36.48	Yes	**	0.0095	C-D
Test details	Mean rank 1	Mean rank 2	Mean rank diff,	n1	n2	Z
CRISPR CONTROL vs. CRISPR MDGA1	47.64	80.05	-32.41	44	40	3.879
CRISPR CONTROL vs. CRISPR MDGA2	47.64	85.42	-37.78	44	31	4.213
CRISPR CONTROL vs. CRISPR MDGA2+rescue	47.64	48.94	-1.305	44	17	0.1195
CRISPR MDGA1 vs. CRISPR MDGA2	80.05	85.42	-5.369	40	31	0.5867
CRISPR MDGA1 vs. CRISPR MDGA2+rescue	80.05	48.94	31.11	40	17	2.809
CRISPR MDGA2 vs. CRISPR MDGA2+rescue	85.42	48.94	36.48	31	17	3.16
Normality test
	CRISPR CONTROL	CRISPR MDGA1	CRISPR MDGA2	CRISPR MDGA2+rescue
Test for normal distribution
Anderson-Darling test
A2*	1.561	1.081	1.151	0.3077
P value	0.0004	0.0069	0.0044	0.5255
Passed normality test (alpha=0.05)?	No	No	No	Yes
P value summary	***	**	**	ns
D'Agostino & Pearson test
K2	16.61	13.23	5.943	0.3685
P value	0.0002	0.0013	0.0512	0.8317
Passed normality test (alpha=0.05)?	No	No	Yes	Yes
P value summary	***	**	ns	ns
Shapiro-Wilk test
W	0.8779	0.8978	0.8857	0.9599
P value	0.0002	0.0017	0.0032	0.6291
Passed normality test (alpha=0.05)?	No	No	No	Yes
P value summary	***	**	**	ns
Kolmogorov-Smirnov test
KS distance	0.1728	0.138	0.1733	0.1563
P value	0.002	0.0532	0.0185	>0,1000
Passed normality test (alpha=0.05)?	No	Yes	No	Yes
P value summary	**	ns	*	ns
Number of values	44	40	31	17

## Sheet: Fig.8C
CRISPR CONTROL	CRISPR MDGA1	CRISPR MDGA2	CRISPR MDGA2+rescue
0.486196	0.487136	0.570417	0.357807
0.321969	0.300585	0.653698	0.4107		Mean +/- SEM of tabulated data
0.450329	0.38667	0.441529	0.31487
0.314292	0.254455	0.561927	0.435798
0.366803	0.397429	0.496751	0.3848
0.522207	0.326008	0.648983	0.308025
0.496262	0.467246	0.384081	0.276008
0.687922	0.235595	0.517026	0.296617
0.498164	0.297758	0.463178	0.4107
0.503108	0.340167	0.470966	0.358618
0.713321	0.354015	0.459489	0.290913
0.419256	0.322693	0.440036	0.360829
0.463178	0.35814	0.336546	0.295349
0.435146	0.327151	0.480492	0.470594
0.431479	0.366059	0.340636	0.292468
0.483817	0.398477	0.353323	0.314065
0.319433	0.428668	0.400505	0.376475
0.526209	0.326278	0.420353
0.308025	0.350464	0.402551
0.372327	0.299972	0.305049
0.412601	0.327039	0.481163
0.318948	0.420967	0.436711
0.266955	0.380666	0.398966
0.274471	0.283817	0.33136
0.369141	0.339398	0.47915
0.339805	0.347954	0.4163
0.405811	0.311828	0.3478
0.385535	0.398796	0.50653
0.414611	0.336546	0.409274
0.308025	0.340982	0.299469
0.376475	0.502335	0.419914
0.341349	0.407589	0.546008
0.356343	0.383556	0.459805
0.382427	0.284216	0.354097
0.313977	0.340539	0.378809
0.328858	0.400525	0.38717
0.414726	0.527319
0.431762	0.363493
0.48519
0.367919
0.452703
0.332314
0.455341
0.413552
Descriptive statistics
	CRISPR CONTROL	CRISPR MDGA1	CRISPR MDGA2	CRISPR MDGA2+rescue
Number of values	44	38	36	17
Minimum	0.267	0.2356	0.2995	0.276
Maximum	0.7133	0.5273	0.6537	0.4706
Range	0.4464	0.2917	0.3542	0.1946
Mean	0.4106	0.3611	0.4389	0.3503
Std. Deviation	0.09435	0.06453	0.08676	0.05801
Std. Error of Mean	0.01422	0.01047	0.01446	0.01407
Kruskal wallis test
Number of families	1
Number of comparisons per family	6
Alpha	0.05
Dunn's multiple comparisons test	Mean rank diff,	Significant?	Summary	Adjusted P Value
CRISPR CONTROL vs. CRISPR MDGA1	21.88	No	ns	0.0693	A-B
CRISPR CONTROL vs. CRISPR MDGA2	-13.95	No	ns	0.6752	A-C
CRISPR CONTROL vs. CRISPR MDGA2+rescue	28.46	No	ns	0.065	A-D
CRISPR MDGA1 vs. CRISPR MDGA2	-35.83	Yes	***	0.0005	B-C
CRISPR MDGA1 vs. CRISPR MDGA2+rescue	6.586	No	ns	>0,9999	B-D
CRISPR MDGA2 vs. CRISPR MDGA2+rescue	42.41	Yes	**	0.0014	C-D
Test details	Mean rank 1	Mean rank 2	Mean rank diff,	n1	n2	Z
CRISPR CONTROL vs. CRISPR MDGA1	74.02	52.14	21.88	44	38	2.526
CRISPR CONTROL vs. CRISPR MDGA2	74.02	87.97	-13.95	44	36	1.587
CRISPR CONTROL vs. CRISPR MDGA2+rescue	74.02	45.56	28.46	44	17	2.548
CRISPR MDGA1 vs. CRISPR MDGA2	52.14	87.97	-35.83	38	36	3.938
CRISPR MDGA1 vs. CRISPR MDGA2+rescue	52.14	45.56	6.586	38	17	0.577
CRISPR MDGA2 vs. CRISPR MDGA2+rescue	87.97	45.56	42.41	36	17	3.685

## Sheet: Fig.8D
CRISPR CONTROL	CRISPR MDGA1	CRISPR MDGA2	CRISPR MDGA2 + rescueMDGA2
0.454154	0.495059	1.11313	0.147669
0.283112	0.18123	1.01325	0.268161		Mean +/- SEM of tabulated data
0.589964	0.211403	0.438824	0.203528
0.200792	0.575644	0.703163	0.3615
0.263184	0.534611	0.614888	0.893155
0.387601	0.344731	0.746727	0.299951
0.519433	0.613438	0.552993	0.186243
0.328068	0.504023	0.551642	0.0880442
0.266029	0.441709	0.535749	0.253569
0.338978	0.506099	0.921402	0.338982
0.49351	0.467457	0.406611	0.22385
0.204418	0.402292	0.594041	0.590983
0.480346	1.10076	0.478209	0.6787
0.196758	1.06474	0.273507	0.31939
0.681571	0.666707	0.557274	0.702656
0.233069	0.643634	0.601318	0.466516
0.344621	1.17737	0.298051	0.480019
0.471327	0.702412	0.572077	0.56922
0.644392	0.672687	0.839569
0.958139	0.478906	0.622088
0.351336	0.384054	0.940526
0.369263	0.252106	0.580148
0.609208	0.604544	0.53723
0.527615	0.721125	1.24398
0.794739	0.674768	0.388012
0.515112	0.340218	0.479316
0.666928	0.638719	0.482291
0.576226	0.30553	0.545183
0.722909	0.395957	0.702324
0.550016	0.409938	0.700177
0.609688	0.478711	0.356544
0.719815	0.429103	0.610826
0.3102	0.834613	0.933612
0.468257	0.72852	0.773484
0.359596	1.19351
0.28266	0.967561
0.571562	0.292361
0.513153	0.466845
0.305212
0.407745
0.372601
0.432048
0.403983
0.513896
0.30529
0.387281
Descriptive statistics
	CRISPR CONTROL	CRISPR MDGA1	CRISPR MDGA2	CRISPR MDGA2+rescue
Number of values	46	38	34	18
Minimum	0.1968	0.1812	0.2735	0.08804
Maximum	0.9581	1.194	1.244	0.8932
Range	0.7614	1.012	0.9705	0.8051
Mean	0.4562	0.5764	0.6385	0.3929
Std. Deviation	0.1699	0.2578	0.2268	0.2202
Std. Error of Mean	0.02505	0.04183	0.03889	0.0519
Kruskal wallis test
Number of families	1
Number of comparisons per family	6
Alpha	0.05
Dunn's multiple comparisons test	Mean rank diff,	Significant?	Summary	Adjusted P Value
CRISPR CONTROL vs. CRISPR MDGA1	-18.05	No	ns	0.2199	A-B
CRISPR CONTROL vs. CRISPR MDGA2	-31.41	Yes	**	0.0025	A-C
CRISPR CONTROL vs. CRISPR MDGA2+rescue	12.35	No	ns	>0,9999	A-D
CRISPR MDGA1 vs. CRISPR MDGA2	-13.36	No	ns	0.906	B-C
CRISPR MDGA1 vs. CRISPR MDGA2+rescue	30.4	Yes	*	0.0421	B-D
CRISPR MDGA2 vs. CRISPR MDGA2+rescue	43.76	Yes	***	0.0008	C-D
Test details	Mean rank 1	Mean rank 2	Mean rank diff,	n1	n2	Z
CRISPR CONTROL vs. CRISPR MDGA1	57.24	75.29	-18.05	46	38	2.09
CRISPR CONTROL vs. CRISPR MDGA2	57.24	88.65	-31.41	46	34	3.524
CRISPR CONTROL vs. CRISPR MDGA2+rescue	57.24	44.89	12.35	46	18	1.127
CRISPR MDGA1 vs. CRISPR MDGA2	75.29	88.65	-13.36	38	34	1.436
CRISPR MDGA1 vs. CRISPR MDGA2+rescue	75.29	44.89	30.4	38	18	2.696
CRISPR MDGA2 vs. CRISPR MDGA2+rescue	88.65	44.89	43.76	34	18	3.81

## Sheet: Fig.8E
CRISPR CONTROL	CRISPR MDGA1	CRISPR MDGA2	CRISPR MDGA2 + rescue MDGA2
0.847069	0.332277	0.511093	0.453481
0.675572	0.364741	0.386822	0.306124		Mean +/- SEM of tabulated data
0.503108	0.46489	0.345826	0.329087
0.81536	0.371754	0.51582	0.495122
0.708659	0.496643	0.474794	0.520981
0.701612	0.538205	0.441634	0.262392
0.434303	0.427812	0.316198	0.298246
0.312588	0.453932	0.310727	0.399292
0.791282	0.4107	0.430665	0.511236
0.468882	0.378835	0.307018	0.406897
0.50811	0.298518	0.384224	0.243853
0.54047	0.417545	0.605519	0.361644
0.516267	0.45177	0.717095	0.431943
0.529481	0.369514	0.289357	0.536192
0.297818	0.33424	0.323063	0.359851
0.476868	0.444925	0.561083	0.798583
0.311828	0.593233	0.346199	0.4107
0.62974	0.285208	0.610346	0.604642
0.446555	0.348667	0.415116
0.416624	0.373499	0.250698
0.487706	0.278264	0.314014
0.618902	0.55473	0.378007
0.321063	0.569602	0.47915
0.432781	0.371586	0.395014
0.362215	0.319827	0.396092
0.535051	0.389561	0.486756
0.298246	0.382698	0.438508
0.369394	0.426183	0.432091
0.50653	0.408255	0.397614
0.459087	0.485774	0.541516
0.444047	0.401316	0.562379
0.366539	0.571454	0.812844
0.359362	0.306884	0.433517
0.21279	0.442012	0.367091
0.309926	0.448094	0.539275
0.399292	0.554934
0.3657	0.615289
0.365719	0.456333
0.335731	0.337116
0.359362
0.584458
0.414503
0.348555
0.382892
0.66861
0.636015
Dscriptive statistics
	CRISPR CONTROL	CRISPR MDGA1	CRISPR MDGA2	CRISPR MDGA2+rescue
Number of values	46	39	35	18
Minimum	0.2128	0.2783	0.2507	0.2439
Maximum	0.8471	0.6153	0.8128	0.7986
Range	0.6343	0.337	0.5621	0.5547
Mean	0.4756	0.4225	0.4433	0.4295
Std. Deviation	0.1505	0.08902	0.123	0.136
Std. Error of Mean	0.0222	0.01425	0.02079	0.03205
Kruskal Wallis test
Number of families	1
Number of comparisons per family	6
Alpha	0.05
Dunn's multiple comparisons test	Mean rank diff,	Significant?	Summary	Adjusted P Value
CRISPR CONTROL vs. CRISPR MDGA1	11.05	No	ns	>0,9999	A-B
CRISPR CONTROL vs. CRISPR MDGA2	6.865	No	ns	>0,9999	A-C
CRISPR CONTROL vs. CRISPR MDGA2+rescue	13.04	No	ns	>0,9999	A-D
CRISPR MDGA1 vs. CRISPR MDGA2	-4.187	No	ns	>0,9999	B-C
CRISPR MDGA1 vs. CRISPR MDGA2+rescue	1.985	No	ns	>0,9999	B-D
CRISPR MDGA2 vs. CRISPR MDGA2+rescue	6.172	No	ns	>0,9999	C-D
Test details	Mean rank 1	Mean rank 2	Mean rank diff,	n1	n2	Z
CRISPR CONTROL vs. CRISPR MDGA1	76.07	65.01	11.05	46	39	1.27
CRISPR CONTROL vs. CRISPR MDGA2	76.07	69.2	6.865	46	35	0.7655
CRISPR CONTROL vs. CRISPR MDGA2+rescue	76.07	63.03	13.04	46	18	1.173
CRISPR MDGA1 vs. CRISPR MDGA2	65.01	69.2	-4.187	39	35	0.4498
CRISPR MDGA1 vs. CRISPR MDGA2+rescue	65.01	63.03	1.985	39	18	0.1742
CRISPR MDGA2 vs. CRISPR MDGA2+rescue	69.2	63.03	6.172	35	18	0.5323

## Sheet: Fig.8G
CRISPR CONTROL	CRISPR MDGA1	CRISPR MDGA2	CRISPR MDGA2 + rescueMDGA2
5.91	3.57	10.93	3.75
4.89	6.68	21.83	4.63
0.78	3.5	14.6	3.22
0.85	15.4	15.69	3.26
0.1	6.56	8.7	2.51
1.22	14.07	9.2	3.63
2.03	18.38	4.47
		12.92
		4.28
		1.51
		13.94
		11.32
Descriptive statistics
	CRISPR CONTROL	CRISPR MDGA1	CRISPR MDGA2	CRISPR MDGA2+rescue
Number of values	7	7	12	6
Minimum	0.1	3.5	1.51	2.51
Maximum	5.91	18.38	21.83	4.63
Range	5.81	14.88	20.32	2.12
Mean	2.254	9.737	10.78	3.5
Std. Deviation	2.244	6.082	5.645	0.7032
Std. Error of Mean	0.8482	2.299	1.63	0.2871
Normality test
	CRISPR CONTROL	CRISPR MDGA1	CRISPR MDGA2	CRISPR MDGA2+rescue
Test for normal distribution
Anderson-Darling test
A2*	N too small	N too small	0.1966	N too small
P value			0.8563
Passed normality test (alpha=0.05)?			Yes
P value summary			ns
D'Agostino & Pearson test
K2	N too small	N too small	0.1388	N too small
P value			0.9329
Passed normality test (alpha=0.05)?			Yes
P value summary			ns
Shapiro-Wilk test
W	0.838	0.8727	0.9746	0.9649
P value	0.0952	0.196	0.9526	0.8565
Passed normality test (alpha=0.05)?	Yes	Yes	Yes	Yes
P value summary	ns	ns	ns	ns
Kolmogorov-Smirnov test
KS distance	0.2541	0.2638	0.1183	0.1944
P value	>0,1000	>0,1000	>0,1000	>0,1000
Passed normality test (alpha=0.05)?	Yes	Yes	Yes	Yes
P value summary	ns	ns	ns	ns
Number of values	7	7	12	6
Kruskal wallis test
Number of families	1
Number of comparisons per family	6
Alpha	0.05
Dunn's multiple comparisons test	Mean rank diff,	Significant?	Summary	Adjusted P Value
CRISPR CONTROL vs. CRISPR MDGA1	-13.71	Yes	*	0.0374	A-B
CRISPR CONTROL vs. CRISPR MDGA2	-14.8	Yes	**	0.0055	A-C
CRISPR CONTROL vs. CRISPR MDGA2+rescue	-3.548	No	ns	>0,9999	A-D
CRISPR MDGA1 vs. CRISPR MDGA2	-1.083	No	ns	>0,9999	B-C
CRISPR MDGA1 vs. CRISPR MDGA2+rescue	10.17	No	ns	0.3085	B-D
CRISPR MDGA2 vs. CRISPR MDGA2+rescue	11.25	No	ns	0.0988	C-D
Test details	Mean rank 1	Mean rank 2	Mean rank diff,	n1	n2	Z
CRISPR CONTROL vs. CRISPR MDGA1	7.286	21	-13.71	7	7	2.735
CRISPR CONTROL vs. CRISPR MDGA2	7.286	22.08	-14.8	7	12	3.317
CRISPR CONTROL vs. CRISPR MDGA2+rescue	7.286	10.83	-3.548	7	6	0.6797
CRISPR MDGA1 vs. CRISPR MDGA2	21	22.08	-1.083	7	12	0.2428
CRISPR MDGA1 vs. CRISPR MDGA2+rescue	21	10.83	10.17	7	6	1.948
CRISPR MDGA2 vs. CRISPR MDGA2+rescue	22.08	10.83	11.25	12	6	2.399

## Sheet: Fig.8H
CRISPR CONTROL	CRISPR MDGA1	CRISPR MDGA2	CRISPR MDGA2+rescue
13.82	14.07	15.07	25.25
13.8	9.94	13.41	20.16
8.16	10.71	18.12	9.95
20.79	23.23	19.94	12.36
34.32	12.64	31.06	9.34
15.91	21.05	28.03	15.68
17.28	23.57	11.5
		20.21
		34.67
		13.46
		16.87
		27.11
Descriptive Statistics								Normality test
	CRISPR CONTROL	CRISPR MDGA1	CRISPR MDGA2	CRISPR MDGA2+rescue					CRISPR CONTROL	CRISPR MDGA1	CRISPR MDGA2	CRISPR MDGA2+rescue
Number of values	7	7	12	6				Test for normal distribution
								Anderson-Darling test
Minimum	8.16	9.94	11.5	9.34				A2*	N too small	N too small	0.4321	N too small
Maximum	34.32	23.57	34.67	25.25				P value			0.2528
Range	26.16	13.63	23.17	15.91				Passed normality test (alpha=0.05)?			Yes
								P value summary			ns
Mean	17.73	16.46	20.79	15.46
Std. Deviation	8.271	5.963	7.635	6.252				D'Agostino & Pearson test
Std. Error of Mean	3.126	2.254	2.204	2.552				K2	N too small	N too small	1.57	N too small
								P value			0.456
Kruskal Wallis								Passed normality test (alpha=0.05)?			Yes
								P value summary			ns
Number of families	1
Number of comparisons per family	6							Shapiro-Wilk test
Alpha	0.05							W	0.871	0.851	0.9169	0.9174
								P value	0.1893	0.1255	0.2612	0.4866
Dunn's multiple comparisons test	Mean rank diff,	Significant?	Summary	Adjusted P Value				Passed normality test (alpha=0.05)?	Yes	Yes	Yes	Yes
CRISPR CONTROL vs. CRISPR MDGA1	1.143	No	ns	>0,9999	A-B			P value summary	ns	ns	ns	ns
CRISPR CONTROL vs. CRISPR MDGA2	-3.667	No	ns	>0,9999	A-C
CRISPR CONTROL vs. CRISPR MDGA2+rescue	3.333	No	ns	>0,9999	A-D			Kolmogorov-Smirnov test
CRISPR MDGA1 vs. CRISPR MDGA2	-4.81	No	ns	>0,9999	B-C			KS distance	0.2358	0.2271	0.1968	0.1898
CRISPR MDGA1 vs. CRISPR MDGA2+rescue	2.19	No	ns	>0,9999	B-D			P value	>0,1000	>0,1000	>0,1000	>0,1000
CRISPR MDGA2 vs. CRISPR MDGA2+rescue	7	No	ns	0.8136	C-D			Passed normality test (alpha=0.05)?	Yes	Yes	Yes	Yes
								P value summary	ns	ns	ns	ns
Test details	Mean rank 1	Mean rank 2	Mean rank diff,	n1	n2	Z
CRISPR CONTROL vs. CRISPR MDGA1	16	14.86	1.143	7	7	0.2279		Number of values	7	7	12	6
CRISPR CONTROL vs. CRISPR MDGA2	16	19.67	-3.667	7	12	0.8219
CRISPR CONTROL vs. CRISPR MDGA2+rescue	16	12.67	3.333	7	6	0.6387
CRISPR MDGA1 vs. CRISPR MDGA2	14.86	19.67	-4.81	7	12	1.078
CRISPR MDGA1 vs. CRISPR MDGA2+rescue	14.86	12.67	2.19	7	6	0.4197
CRISPR MDGA2 vs. CRISPR MDGA2+rescue	19.67	12.67	7	12	6	1.492
