# Supplementary material for: MDGAs are fast-diffusing molecules that delay excitatory synapse development by altering neuroligin behavior
Source: eLife. 2022 May 9;11:e75233. doi: 10.7554/eLife.75233 (PMC9084894; doi:10.7554/eLife.75233)
Supplement: Figure 9—figure supplement 1—source data 1. — Each graph (A,B,D) is shown in a separate sheet within the file. [file elife-75233-fig9-figsupp1-data1.xlsx]

## Sheet: Fig.9-S1A
Raw data
	CRISPR CONTROL			CRISPR MDGA1			CRISPR MDGA2
	Non electro	electro		Non electro	electro		Non electro	electro
	-7.86336	-8.14718		-14.6419	-12.7362		-3.49517	-17.1081
	-9.5885	-4.97737		-9.12068	-10.9493		-8.3	-12
	-18.0705	-16.7669		-27.5743	-27.9838		-17.1873	-37.1064
	-29.204	-27.1475		-15.2173	-12.0924		-21.3339	-71.6199
	-11.7746	-18.5836		-3.63197	-8.69319		-10.5232	-15.1805
				-25.5799	-70.5688		-2.9	-4.7
				-21.0392	-98.754		-2.73754	-6.08091
				-37.6218	-85.8379		-12.7833	-42.2198
				-100.871	-96.6335
				-4.83541	-18.2761
				-12.7658	-47.9722
				-16.8529	-32.5136
				-31.6869	-60.5908
Descriptive statistics										Normality test
	CRISPR CONTROL			CRISPR MDGA1			CRISPR MDGA2				CRISPR CONTROL			CRISPR MDGA1			CRISPR MDGA2
	Non electro	electro		Non electro	electro		Non electro	electro		Test for normal distribution	Non electro	electro		Non electro	electro		Non electro	electro
Number of values	5	5		13	13		8	8		Anderson-Darling test
										A2*	N too small	N too small		1.356	0.6044		0.3054	0.5167
Minimum	-29.2	-27.15		-100.9	-98.75		-21.33	-71.62		P value				0.001	0.0912		0.4858	0.129
Maximum	-7.863	-4.977		-3.632	-8.693		-2.738	-4.7		Passed normality test (alpha=0.05)?				No	Yes		Yes	Yes
Range	21.34	22.17		97.24	90.06		18.6	66.92		P value summary				***	ns		ns	ns
Mean	-15.3	-15.12		-24.73	-44.89		-9.908	-25.75		D'Agostino & Pearson test
Std. Deviation	8.68	8.816		25.03	34.02		6.933	23.02		K2	N too small	N too small		24.08	3.06		0.8392	3.58
Std. Error of Mean	3.882	3.942		6.941	9.436		2.451	8.139		P value				<0.0001	0.2166		0.6573	0.167
										Passed normality test (alpha=0.05)?				No	Yes		Yes	Yes
Wilcoxon matched-pairs signed rank test							Paired t-test			P value summary				****	ns		ns	ns
	CRISPR CONTROL			CRISPR MDGA1			CRISPR MDGA2
	Electro			electro				electro		Shapiro-Wilk test
	vs.			vs.				vs.		W	0.8742	0.9577		0.6991	0.8734		0.9127	0.8583
	Non electro			Non electro				Non electro		P value	0.2839	0.7917		0.0005	0.0581		0.3736	0.1154
										Passed normality test (alpha=0.05)?	Yes	Yes		No	Yes		Yes	Yes
Wilcoxon matched-pairs signed rank test							Paired t test			P value summary	ns	ns		***	ns		ns	ns
P value	0.8125			0.0171			P value	0.0335
Exact or approximate P value?	Exact			Exact			P value summary	*		Kolmogorov-Smirnov test
P value summary	ns			*			Significantly different (P < 0.05)?	Yes		KS distance	0.2577	0.1857		0.2366	0.1805		0.1975	0.2713
Significantly different (P < 0.05)?	No			Yes			One- or two-tailed P value?	Two-tailed		P value	>0.1000	>0.1000		0.045	>0.1000		>0.1000	0.085
One- or two-tailed P value?	Two-tailed			Two-tailed			t, df	t=2.639, df=7		Passed normality test (alpha=0.05)?	Yes	Yes		No	Yes		Yes	Yes
Sum of positive, negative ranks	9.000 , -6.000			12.00 , -79.00			Number of pairs	8		P value summary	ns	ns		*	ns		ns	ns
Sum of signed ranks (W)	3			-67
Number of pairs	5			13			How big is the difference?			Number of values	5	5		13	13		8	8
Number of ties (ignored)	0			0			Mean of differences (B - A)	-15.84
							SD of differences	16.98
Median of differences							SEM of differences	6.004
Median	1.304			-13.44			95% confidence interval	-30.04 to -1.647
							R squared (partial eta squared)	0.4987
How effective was the pairing?
rs (Spearman)	0.8			0.7692			How effective was the pairing?
P value (one tailed)	0.0667			0.0015			Correlation coefficient (r)	0.9074
P value summary	ns			**			P value (one tailed)	0.0009
Was the pairing significantly effective?	No			Yes			P value summary	***
							Was the pairing significantly effective?	Yes

## Sheet: Fig.9-S1B
Raw data
	CRISPR CONTROL			CRISPR MDGA1			CRISPR MDGA2
	Non electro	electro		Non electro	electro		Non electro	electro
	21	15		24.6	19.1		7.4	44.1
	1.5	1.4		21.3	17.1		46.2	7.3
	7.2	4.2		34.1	22.8		32	16.2
	28.9	24.7		13.5	10.2		20.2	20.6
	20.5	37.1		2.8	6.9		30.2	10.5
				40.4	62.8		79.4	51.4
				58.6	58		13.4	29.8
				34.2	52.2		78.7	90.3
				40.1	20
				23.5	14.5
				36.3	18.4
				27.7	17
				70.3	31.4
Descriptive statistics										Normality test
	CRISPR CONTROL			CRISPR MDGA1			CRISPR MDGA2				CRISPR CONTROL			CRISPR MDGA1			CRISPR MDGA2
	Non electro	electro		Non electro	electro		Non electro	electro		Test for normal distribution	Non electro	electro		Non electro	electro		Non electro	electro
Number of values	5	5		13	13		8	8		Anderson-Darling test
										A2*	N too small	N too small		0.3086	1.115		0.4315	0.4236
Minimum	1.5	1.4		2.8	6.9		7.4	7.3		P value				0.5136	0.0041		0.2244	0.236
Maximum	28.9	37.1		70.3	62.8		79.4	90.3		Passed normality test (alpha=0.05)?				Yes	No		Yes	Yes
Range	27.4	35.7		67.5	55.9		72	83		P value summary				ns	**		ns	ns
Mean	15.82	16.48		32.88	26.95		38.44	33.78		D'Agostino & Pearson test
Std. Deviation	11.17	14.77		17.76	18.58		27.75	27.65		K2	N too small	N too small		1.635	3.382		1.28	4.506
Std. Error of Mean	4.996	6.607		4.925	5.152		9.812	9.777		P value				0.4416	0.1843		0.5274	0.1051
										Passed normality test (alpha=0.05)?				Yes	Yes		Yes	Yes
Wilcoxon matched-pairs signed rank test							Paired t-test			P value summary				ns	ns		ns	ns
	CRISPR CONTROL			CRISPR MDGA1			CRISPR MDGA2
	Electro			electro				electro		Shapiro-Wilk test
	vs.			vs.				vs.		W	0.9296	0.9417		0.9594	0.8155		0.8798	0.8781
	Non electro			Non electro				Non electro		P value	0.5937	0.6783		0.7441	0.0105		0.1877	0.1807
										Passed normality test (alpha=0.05)?	Yes	Yes		Yes	No		Yes	Yes
Wilcoxon matched-pairs signed rank test							Paired t test			P value summary	ns	ns		ns	*		ns	ns
P value	0.625			0.1677			P value	0.6195
Exact or approximate P value?	Exact			Exact			P value summary	ns		Kolmogorov-Smirnov test
P value summary	ns			ns			Significantly different (P < 0.05)?	No		KS distance	0.2624	0.1971		0.182	0.2808		0.2167	0.1831
Significantly different (P < 0.05)?	No			No			One- or two-tailed P value?	Two-tailed		P value	>0.1000	>0.1000		>0.1000	0.0061		>0.1000	>0.1000
One- or two-tailed P value?	Two-tailed			Two-tailed			t, df	t=0.5195, df=7		Passed normality test (alpha=0.05)?	Yes	Yes		Yes	No		Yes	Yes
Sum of positive, negative ranks	5.000 , -10.00			25.00 , -66.00			Number of pairs	8		P value summary	ns	ns		ns	**		ns	ns
Sum of signed ranks (W)	-5			-41
Number of pairs	5			13			How big is the difference?			Number of values	5	5		13	13		8	8
Number of ties (ignored)	0			0			Mean of differences (B - A)	-4.663
							SD of differences	25.39
Median of differences							SEM of differences	8.976
Median	-3			-5.5			95% confidence interval	-25.89 to 16.56
							R squared (partial eta squared)	0.03712
How effective was the pairing?
rs (Spearman)	0.7			0.8571			How effective was the pairing?
P value (one tailed)	0.1167			0.0002			Correlation coefficient (r)	0.5801
P value summary	ns			***			P value (one tailed)	0.0658
Was the pairing significantly effective?	No			Yes			P value summary	ns
							Was the pairing significantly effective?	No

## Sheet: Fig.9-S1D
Raw data
	Non electro	CRISPR CONTROL	CRISPR-MDGA1	CRISPR-MDGA2
	1.6694	2.25771	1.53744	1.53209
	2.22892	2.91319	1.65064	1.625
	1.02189	1.424	1.73454	1.23852
	1.045	1.60246	1.40621	1.47241
	1.73277	1.38171	1.93575	1.15126
	1.6196		1.76831	1.57447
	1.61155		1.15318	1.57108
	3.65517		1.40175	1.33633
	1.13044		1.11609
	1.60497		1.14829
	1.26216		1.69592
	1.48903		1.55248
	2.41399		0.964808
	1.64195		1.45684
	1.02932
	1.91304
	1.47768
	1.49892
	1.45614
	1.29145
	1.42084
	1.43588
	1.61354
	1.53821
	2.36352
	1.52496
	1.07369
	1.18664
	1.13902
Descriptive statistics								Normality test
	Non electro	CRISPR CONTROL	CRISPR-MDGA1	CRISPR-MDGA2					Non electro	CRISPR CONTROL	CRISPR-MDGA1	CRISPR-MDGA2
Number of values	29	8	14	5				Test for normal distribution
								Anderson-Darling test
Minimum	1.022	1.151	0.9648	1.382				A2*	1.673	0.4117	0.2671	N too small
Maximum	3.655	1.625	1.936	2.913				P value	0.0002	0.2543	0.6299
Range	2.633	0.4737	0.9709	1.531				Passed normality test (alpha=0.05)?	No	Yes	Yes
								P value summary	***	ns	ns
Mean	1.589	1.438	1.466	1.916
Std. Deviation	0.5401	0.1747	0.2861	0.659				D'Agostino & Pearson test
Std. Error of Mean	0.1003	0.06177	0.07646	0.2947				K2	28.5	1.425	0.7142	N too small
								P value	<0.0001	0.4903	0.6997
								Passed normality test (alpha=0.05)?	No	Yes	Yes
Kruskal-Wallis test								P value summary	****	ns	ns
Number of families	1
Number of comparisons per family	6							Shapiro-Wilk test
Alpha	0.05							W	0.788	0.8952	0.9619	0.8556
								P value	<0.0001	0.2616	0.7546	0.213
Dunn's multiple comparisons test	Mean rank diff.	Significant?	Summary	Adjusted P Value				Passed normality test (alpha=0.05)?	No	Yes	Yes	Yes
Control vs. CRISPR-MDGA2	2.983	No	ns	>0.9999	A-B			P value summary	****	ns	ns	ns
Control vs. CRISPR-MDGA1	0.9828	No	ns	>0.9999	A-C
Control vs. CRISPR-CTRL	-7.717	No	ns	>0.9999	A-D			Kolmogorov-Smirnov test
CRISPR-MDGA2 vs. CRISPR-MDGA1	-2	No	ns	>0.9999	B-C			KS distance	0.2342	0.2056	0.1485	0.2828
CRISPR-MDGA2 vs. CRISPR-CTRL	-10.7	No	ns	>0.9999	B-D			P value	0.0003	>0.1000	>0.1000	>0.1000
CRISPR-MDGA1 vs. CRISPR-CTRL	-8.7	No	ns	>0.9999	C-D			Passed normality test (alpha=0.05)?	No	Yes	Yes	Yes
								P value summary	***	ns	ns	ns
Test details	Mean rank 1	Mean rank 2	Mean rank diff.	n1	n2	Z
Control vs. CRISPR-MDGA2	28.48	25.5	2.983	29	8	0.458		Number of values	29	8	14	5
Control vs. CRISPR-MDGA1	28.48	27.5	0.9828	29	14	0.1852
Control vs. CRISPR-CTRL	28.48	36.2	-7.717	29	5	0.9772
CRISPR-MDGA2 vs. CRISPR-MDGA1	25.5	27.5	-2	8	14	0.2767
CRISPR-MDGA2 vs. CRISPR-CTRL	25.5	36.2	-10.7	8	5	1.151
CRISPR-MDGA1 vs. CRISPR-CTRL	27.5	36.2	-8.7	14	5	1.024
