# Supplementary material for: MDGAs are fast-diffusing molecules that delay excitatory synapse development by altering neuroligin behavior
Source: eLife. 2022 May 9;11:e75233. doi: 10.7554/eLife.75233 (PMC9084894; doi:10.7554/eLife.75233)
Supplement: Figure 9—source data 1. — Each graph (C,D,E) is shown in a separate sheet within the file. [file elife-75233-fig9-data1.xlsx]

## Sheet: Fig.9C
Descriptive Statistics
	CRISPR CONTROL	CRISPR MDGA1	CRISPR MDGA2
	103.609	86.984	489.478
	51.9097	120.049	144.578
	92.786	101.485
	92.9581	79.4648
	157.828	239.352
		275.876	215.894
		469.38	335.71
		228.16	144.258
		95.7989	162.069
			222.131
		377.964	330.272
		375.787
		192.926
		191.217
Descriptive Statistics								Normality test
	CRISPR CONTROL	CRISPR MDGA1	CRISPR MDGA2						CRISPR-CTRL	CRISPR-MDGA1	CRISPR-MDGA2
Number of values	5	13	8					Test for normal distribution
								Anderson-Darling test
Minimum	51.91	79.46	144.3					A2*	N too small	0.472	0.4621
Maximum	157.8	469.4	489.5					P value		0.2023	0.1844
Range	105.9	389.9	345.2					Passed normality test (alpha=0.05)?		Yes	Yes
								P value summary		ns	ns
Mean	99.82	218	255.5
Std. Deviation	37.98	126.9	121.2					D'Agostino & Pearson test
Std. Error of Mean	16.99	35.21	42.86					K2	N too small	1.498	2.382
								P value		0.4729	0.3039
Kruskal Wallis								Passed normality test (alpha=0.05)?		Yes	Yes
								P value summary		ns	ns
Number of families	1
Number of comparisons per family	3							Shapiro-Wilk test
Alpha	0.05							W	0.9236	0.9038	0.87
								P value	0.5535	0.1509	0.1506
Dunn's multiple comparisons test	Mean rank diff.	Significant?	Summary	Adjusted P Value				Passed normality test (alpha=0.05)?	Yes	Yes	Yes
CRISPR-CTRL vs. CRISPR-MDGA1	-8.231	No	ns	0.1226	A-B			P value summary	ns	ns	ns
CRISPR-CTRL vs. CRISPR-MDGA2	-11	Yes	*	0.0349	A-C
CRISPR-MDGA1 vs. CRISPR-MDGA2	-2.769	No	ns	>0.9999	B-C			Kolmogorov-Smirnov test
								KS distance	0.2602	0.1645	0.2336
Test details	Mean rank 1	Mean rank 2	Mean rank diff.	n1	n2	Z		P value	>0.1000	>0.1000	>0.1000
CRISPR-CTRL vs. CRISPR-MDGA1	6	14.23	-8.231	5	13	2.045		Passed normality test (alpha=0.05)?	Yes	Yes	Yes
CRISPR-CTRL vs. CRISPR-MDGA2	6	17	-11	5	8	2.523		P value summary	ns	ns	ns
CRISPR-MDGA1 vs. CRISPR-MDGA2	14.23	17	-2.769	13	8	0.8057
								Number of values	5	13	8

## Sheet: Fig.9D
Raw data
	CRISPR CONTROL	CRISPR MDGA1	CRISPR MDGA2
	71.4286	77.6423	595.946
	93.3333	80.2817	15.8009
	58.3333	66.8622	50.625
	85.4671	75.5556	101.98
	180.976	246.429	34.7682
		155.446	64.7355
		98.9761	222.388
		152.632	114.74
		49.8753
		61.7021
		50.6887
		61.3718
		44.6657
Descriptive Statistics								Normality test
	CRISPR CONTROL	CRISPR MDGA1	CRISPR MDGA2						CRISPR-CTRL	CRISPR-MDGA1	CRISPR-MDGA2
Number of values	5	13	8					Test for normal distribution
								Anderson-Darling test
Minimum	58.33	44.67	15.8					A2*	N too small	1.171	1.056
Maximum	181	246.4	595.9					P value		0.0029	0.0042
Range	122.6	201.8	580.1					Passed normality test (alpha=0.05)?		No	No
								P value summary		**	**
Mean	97.91	94.01	150.1
Std. Deviation	48.33	58	191.3					D'Agostino & Pearson test
Std. Error of Mean	21.61	16.09	67.62					K2	N too small	11.63	15.08
								P value		0.003	0.0005
Kruskal Wallis								Passed normality test (alpha=0.05)?		No	No
								P value summary		**	***
Number of families	1
Number of comparisons per family	3							Shapiro-Wilk test
Alpha	0.05							W	0.8064	0.7746	0.701
								P value	0.0912	0.0035	0.0023
Dunn's multiple comparisons test	Mean rank diff.	Significant?	Summary	Adjusted P Value				Passed normality test (alpha=0.05)?	Yes	No	No
CRISPR-CTRL vs. CRISPR-MDGA1	2	No	ns	>0.9999	A-B			P value summary	ns	**	**
CRISPR-CTRL vs. CRISPR-MDGA2	1.625	No	ns	>0.9999	A-C
CRISPR-MDGA1 vs. CRISPR-MDGA2	-0.375	No	ns	>0.9999	B-C			Kolmogorov-Smirnov test
								KS distance	0.3377	0.2859	0.3234
Test details	Mean rank 1	Mean rank 2	Mean rank diff.	n1	n2	Z		P value	0.0639	0.0047	0.0137
CRISPR-CTRL vs. CRISPR-MDGA1	15	13	2	5	13	0.4969		Passed normality test (alpha=0.05)?	Yes	No	No
CRISPR-CTRL vs. CRISPR-MDGA2	15	13.38	1.625	5	8	0.3727		P value summary	ns	**	*
CRISPR-MDGA1 vs. CRISPR-MDGA2	13	13.38	-0.375	13	8	0.1091
								Number of values	5	13	8

## Sheet: Fig.9E
Raw data
CRISPR CONTROL			CRISPR MDGA1			CRISPR MDGA2
Non electro	Electro		Non electro	Electro		Non electro	Electro
0.374446	0.543145		0.595201	0.666814		0.472321	0.387939
6.39234	3.55526		0.428201	0.640308		0.179654	1.64384
2.50979	3.99211		0.80863	1.22736
1.01052	1.09909		1.12721	1.18553
0.574372	0.500906		1.29713	1.25988
			0.633166	1.12371		0.537104	2.29052
			0.359031	1.70266		1.05613	3.4767
			1.10005	1.6444		0.34845	1.44576
			2.51549	4.83167		0.0365239	0.0914397
						0.204294	0.204057
			0.205762	1.26042		0.162431	0.46755
			0.351675	2.60718
			0.608408	1.91256
			0.450739	1.92964
Descriptive Statistics										Normality test
	CRISPR CONTROL			CRISPR MDGA1			CRISPR MDGA2				CRISPR CONTROL			CRISPR MDGA1			CRISPR MDGA2
	Non electro	Electro		Non electro	Electro		Non electro	Electro			Non electro	Electro		Non electro	Electro		Non electro	Electro
Number of values	5	5		13	13		8	8		Test for normal distribution
										Anderson-Darling test
Minimum	0.3744	0.5009		0.2058	0.6403		0.03652	0.09144		A2*	N too small	N too small		0.9226	1.105		0.4836	0.4135
Maximum	6.392	3.992		2.515	4.832		1.056	3.477		P value				0.0132	0.0043		0.1604	0.2515
Range	6.018	3.491		2.31	4.191		1.02	3.385		Passed normality test (alpha=0.05)?				No	No		Yes	Yes
										P value summary				*	**		ns	ns
Mean	2.172	1.938		0.8062	1.692		0.3746	1.251
Std. Deviation	2.503	1.699		0.6125	1.085		0.3224	1.197		D'Agostino & Pearson test
Std. Error of Mean	1.119	0.7599		0.1699	0.3009		0.114	0.4231		K2	N too small	N too small		15.26	18.74		6.279	1.606
										P value				0.0005	<0.0001		0.0433	0.448
										Passed normality test (alpha=0.05)?				No	No		No	Yes
Wilcoxon matched-pairs signed rank test							Paired t test			P value summary				***	****		*	ns
	CRISPR CONTROL			CRISPR MDGA1			CRISPR MDGA2			Shapiro-Wilk test
										W	0.7963	0.8041		0.7963	0.7627		0.8684	0.8878
Column B	Electro			Electro			Column B	Electro		P value	0.0755	0.0874		0.0062	0.0025		0.1455	0.2231
vs.	vs.			vs.			vs.	vs.		Passed normality test (alpha=0.05)?	Yes	Yes		No	No		Yes	Yes
Column A	Non electro			Non electro			Column A	Control		P value summary	ns	ns		**	**		ns	ns
Wilcoxon matched-pairs signed rank test							Paired t test			Kolmogorov-Smirnov test
P value	0.8125			0.0005			P value	0.0342		KS distance	0.2787	0.2893		0.2266	0.2594		0.2014	0.2436
Exact or approximate P value?	Exact			Exact			P value summary	*		P value	>0.1000	>0.1000		0.0666	0.0169		>0.1000	>0.1000
P value summary	ns			***			Significantly different (P < 0.05)?	Yes		Passed normality test (alpha=0.05)?	Yes	Yes		Yes	No		Yes	Yes
Significantly different (P < 0.05)?	No			Yes			One- or two-tailed P value?	Two-tailed		P value summary	ns	ns		ns	*		ns	ns
One- or two-tailed P value?	Two-tailed			Two-tailed			t, df	t=2.625, df=7
Sum of positive, negative ranks	9.000 , -6.000			90.00 , -1.000			Number of pairs	8		Number of values	5	5		13	13		8	8
Sum of signed ranks (W)	3			89
Number of pairs	5			13			How big is the difference?
Number of ties (ignored)	0			0			Mean of differences (B - A)	0.8764
							SD of differences	0.9442
Median of differences							SEM of differences	0.3338
Median	0.08857			0.5444			95% confidence interval	0.08699 to 1.666
							R squared (partial eta squared)	0.4961
How effective was the pairing?
rs (Spearman)	0.8			-0.02198			How effective was the pairing?
P value (one tailed)	0.0667			0.4747			Correlation coefficient (r)	0.8355
P value summary	ns			ns			P value (one tailed)	0.0049
Was the pairing significantly effective?	No			No			P value summary	**
							Was the pairing significantly effective?	Yes
