# Supplementary material for: MDGAs are fast-diffusing molecules that delay excitatory synapse development by altering neuroligin behavior
Source: eLife journal article supplement (doi:10.7554/elife.75233), 2022-04-13
Supplement: supp2 [file elife-75233-supp2-v1.pdf]

**Cell Line: COS-7**

**Acc No : 87021302**

**Lot: 15I032**

**P +4**

**5th October 2015**

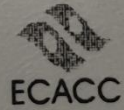

**ECACC**

**Cell Line: 293T**

**Acc No : 12022001**

**Lot: 16G020**

**p +6**

**2nd August 2016**

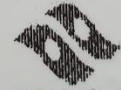

**ECACC**
